# Supplementary material
Source: PubMed Central journal article supplement (PMC3667417)
Supplement: NIHMS464028-supplement-2_si_002.pdf [file NIHMS464028-supplement-2_si_002.pdf]

# Supporting Information

## **Z-Selective Ethenolysis With a Ruthenium Metathesis Catalyst: Experiment and Theory**

Hiroshi Miyazaki,<sup>†,§</sup> Myles B. Herbert,<sup>†,§</sup> Peng Liu,<sup>‡</sup> Xiaofei Dong,<sup>‡</sup> Xiufang Xu,<sup>‡,#</sup> Benjamin K. Keitz,<sup>†</sup> Thay Ung,<sup>§</sup> Garik Mkrtumyan,<sup>§</sup> K. N. Houk,<sup>\*,‡</sup> and Robert H. Grubbs<sup>\*,†</sup>

<sup>†</sup> Arnold and Mabel Beckman Laboratory of Chemical Synthesis, Division of Chemistry and Chemical Engineering, California Institute of Technology, Pasadena, California 91125, United States

<sup>‡</sup> Department of Chemistry and Biochemistry, University of California, Los Angeles, 90095-1569, United States.

<sup>#</sup> Department of Chemistry, Nankai University, Tianjin 300071, P. R. China

<sup>§</sup> Materia Inc., 60 N. San Gabriel Blvd., Pasadena, CA, 91107, United States

## Computational Details

The geometries of all intermediates and transition states were optimized with B3LYP in gas phase. A mixed basis set of LANL2DZ for Ru and 6-31G(d) for other atoms were used in geometry optimizations. Single point energy calculations were performed with the M06 functional and a mixed basis set of SDD for Ru and 6-311+G(d,p) for other atoms. The SMD solvation model was used in M06 single point energy calculations. THF was used as solvent. The reported free energies and enthalpies include zero-point energies and thermal corrections calculated at 298K by B3LYP. All calculations were performed with Gaussian 09. The 3D structures of molecules were generated using CYLView (<http://www.cylview.org>).

The Gibbs free energies in Gaussian were calculated under  $p = 1$  atm. The standard free energies in solution were calculated under the standard state in solution, *i.e.*  $M = 1$  mol/L. The correction was made by adding  $RT \ln(c_{0s}/c_{0g})$  (*i.e.*, about 1.84 kcal/mol) to energies of all structures, where  $c_{0s}$  is the standard molar concentration in aqueous solution (1 mol/L),  $c_{0g}$  the standard molar concentration in gas phase (0.0446 mol/L), and  $R$  the gas constant.

## Complete Reference of Gaussian 09 (Ref. 23)

Gaussian 09, Revision B.01, M. J. Frisch, G. W. Trucks, H. B. Schlegel, G. E. Scuseria, M. A. Robb, J. R. Cheeseman, G. Scalmani, V. Barone, B. Mennucci, G. A. Petersson, H. Nakatsuji, M. Caricato, X. Li, H. P. Hratchian, A. F. Izmaylov, J. Bloino, G. Zheng, J. L. Sonnenberg, M. Hada, M. Ehara, K. Toyota, R. Fukuda, J. Hasegawa, M. Ishida, T. Nakajima, Y. Honda, O. Kitao, H. Nakai, T. Vreven, J. A. Montgomery, Jr., J. E. Peralta, F. Ogliaro, M. Bearpark, J. J. Heyd, E. Brothers, K. N. Kudin, V. N. Staroverov, T. Keith, R. Kobayashi, J. Normand, K. Raghavachari, A. Rendell, J. C. Burant, S. S. Iyengar, J. Tomasi, M. Cossi, N. Rega, J. M. Millam, M. Klene, J. E. Knox, J. B. Cross, V. Bakken, C. Adamo, J. Jaramillo, R. Gomperts, R. E. Stratmann, O. Yazyev, A. J. Austin, R. Cammi, C. Pomelli, J. W. Ochterski, R. L. Martin, K. Morokuma, V. G. Zakrzewski, G. A. Voth, P. Salvador, J. J. Dannenberg, S. Dapprich, A. D. Daniels, O. Farkas, J. B. Foresman, J. V. Ortiz, J. Cioslowski, and D. J. Fox, Gaussian, Inc., Wallingford CT, **2010**.

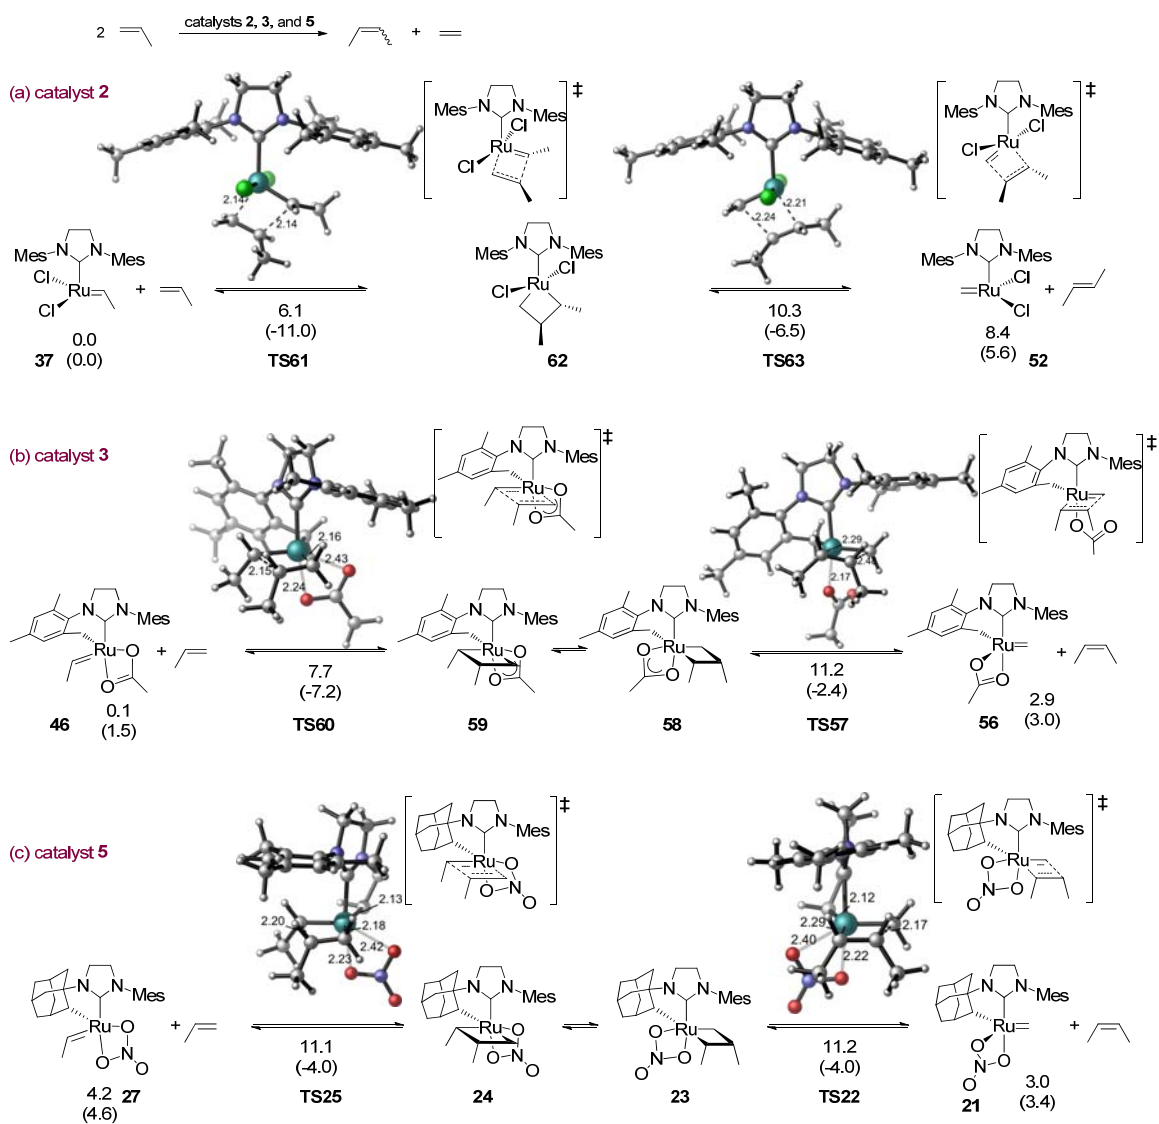

**Figure S1.** Free energies and enthalpies (in parenthesis) of the reaction of propene with ruthenium ethylidene complexes from (a) catalyst **2**; (b) catalyst **3**; and (c) catalyst **5**. All energies are with respect to the most stable isomer of ruthenium alkylidene complexes (**37**, **41**, and **47**, respectively) and are given in kcal/mol. For clarity, the chelating adamantyl group is not shown in the 3D structures of **TS22** and **TS25**.

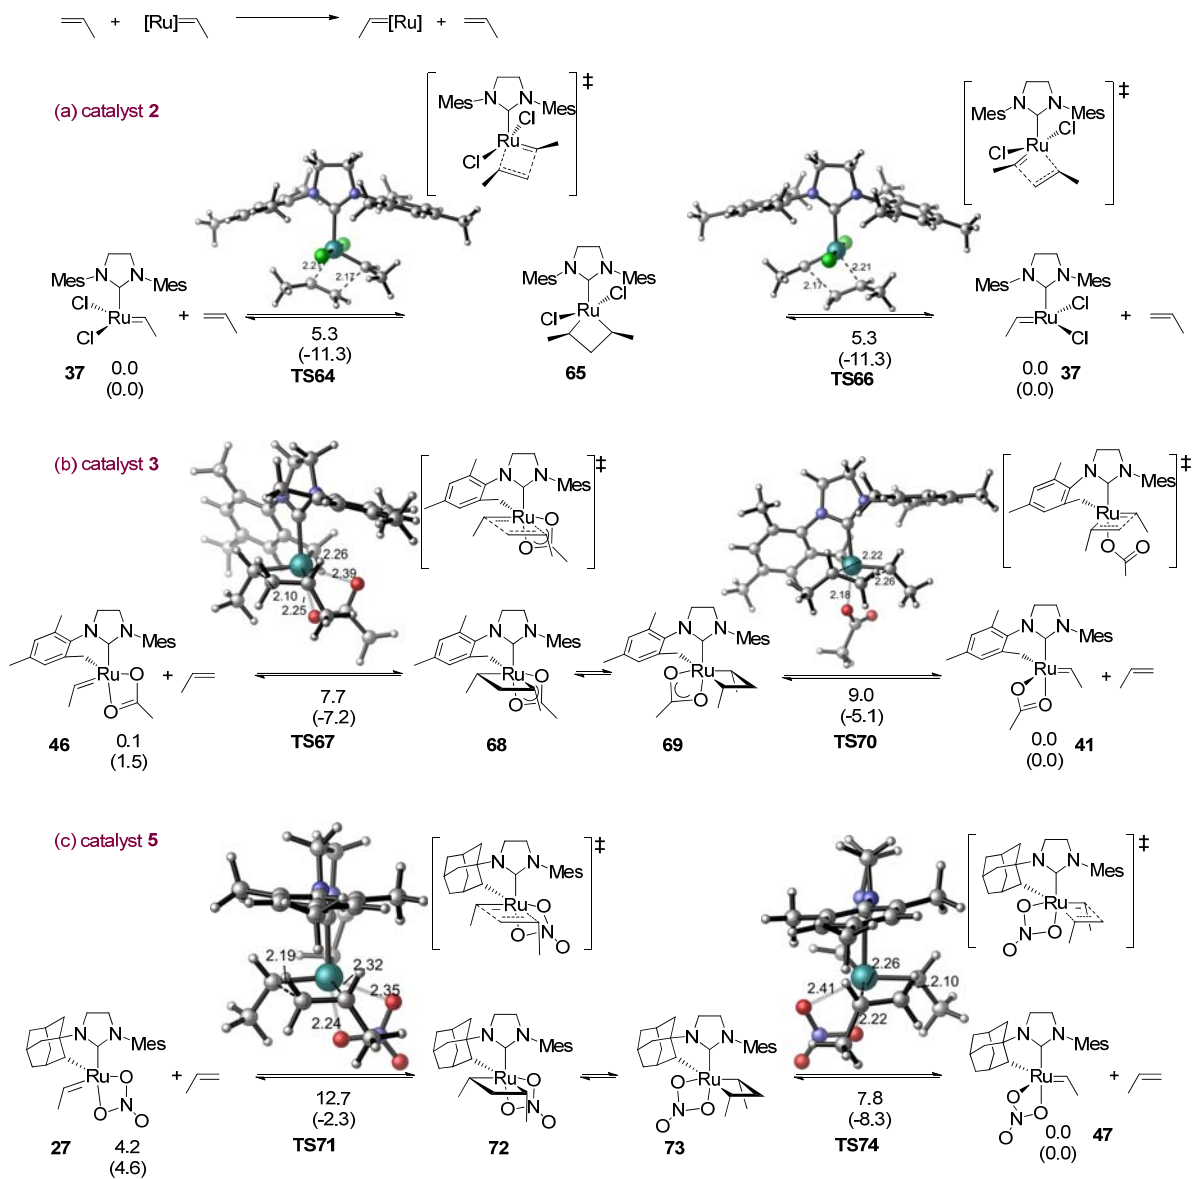

**Figure S2.** Free energies and enthalpies (in parenthesis) of the transition states and ruthenacyclobutane intermediates in the non-productive metathesis pathways of the reaction of propene and ruthenium ethylidene complexes from (a) catalyst **2**; (b) catalyst **3**; and (c) catalyst **5**. All energies are with respect to the most stable isomer of ruthenium alkylidene complexes (**37**, **41**, and **47**, respectively) and are given in kcal/mol. For clarity, the chelating adamantyl group is not shown in the 3D structures of **TS71** and **TS74**.

## Direct productive cleavage of ruthenacyclobutane **23**

In the ethenolysis of *Z*-2-butene with catalyst **5** (Figure 2 in the manuscript), the first metathesis transition state **TS22** leads to a ruthenacyclobutane intermediate **23**, in which the nitrate is syn to the  $\alpha$ -H atom on the chelating adamantyl group. Direct productive cleavage of **23** via metathesis transition state **TS25'** would lead to a propene-ruthenium ethylidene complex, an isomer of **26**. This direct cleavage pathway is highly unfavorable due to the high activation energy of **TS25'** ( $\Delta G^\ddagger = 20.9$  kcal/mol). Thus, **23** undergoes isomerization (see next page for more details) to form another ruthenacyclobutane intermediate **24**, in which the nitrate is anti to the  $\alpha$ -H atom on the adamantyl. Subsequent productive cleavage of **24** (via **TS23**,  $\Delta G^\ddagger = 8.6$  kcal/mol) is much more favorable than the direct cleavage of **23** via **TS25'**. The 3D structure of **TS25'** is shown below. In **TS25'**, the forming alkylidene is trans to the chelating adamantyl group. Both alkylidene and adamantyl are strongly electron-donating ligands and thus prefer to not be *trans* to each other due to trans influences.

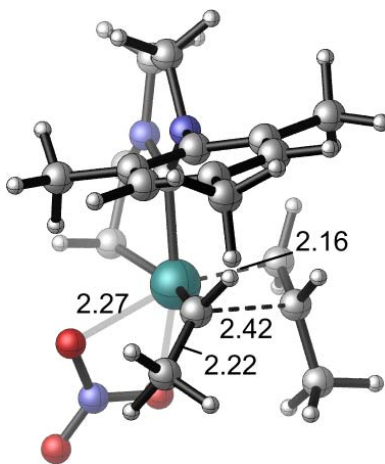

**TS25'**

$$\Delta G^\ddagger = 20.9 \text{ kcal/mol}$$

## Interconversion of Ruthenacyclopropane Intermediates **23** and **24**

The interconversion of the ruthenacyclopropane intermediates **23** and **24** occurs via monodentate nitrate complexes **23'** and **24'**, which are five-coordinated trigonal bipyramidal geometry. Both **23'** and **24'** are lower in energy than corresponding bidentate nitrate complexes. The interconversion between **23'** and **24'** involves rotation of the Ru–O dative single bond. This rotation step is expected to have low barrier. Thus, the interconversion between **23** and **24** should be facile.

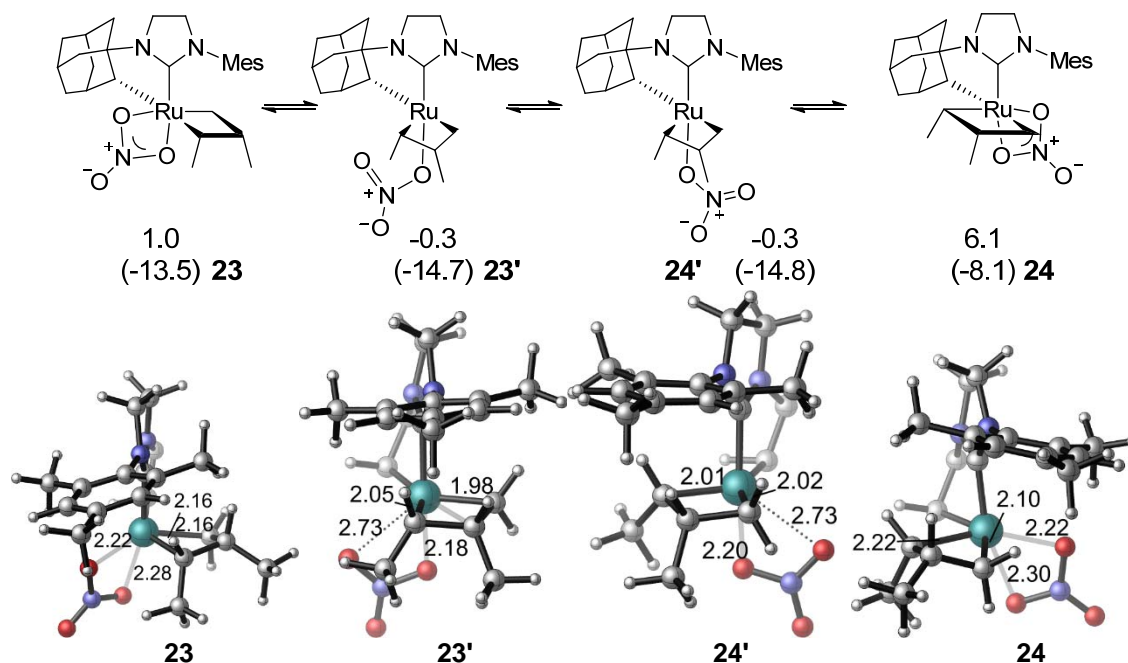

The interconversion between the metallacycle intermediates **34** and **35** from the ethenolysis of *E*-2-butene proceeds via a similar mechanism involving mono-dentate nitrate complexes **34'** and **35'**.

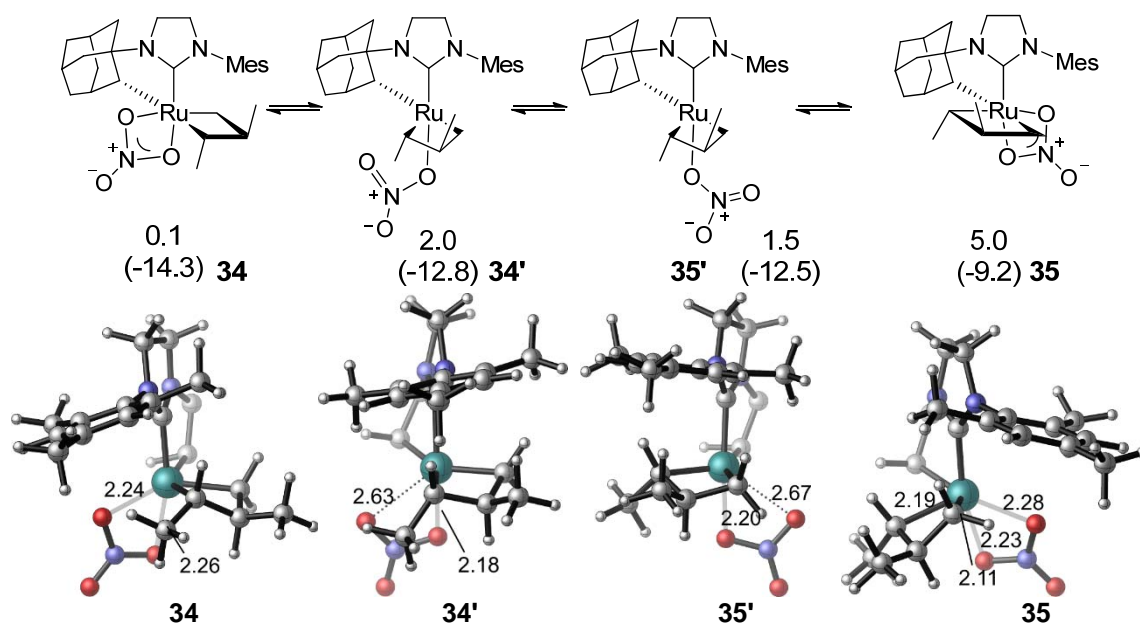

Similarly, the interconversion between the mono-substituted ruthenacyclopentane intermediates **31** and **30** also readily occurs via stable monodentate intermediates **31'** and **30'**.

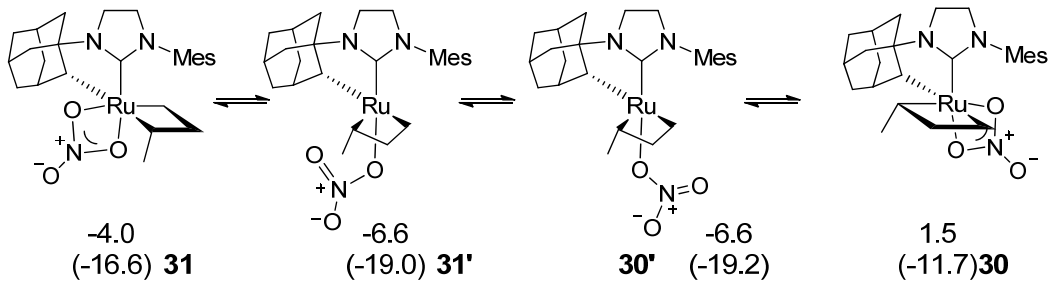

## Monodentate Transition State Structures

In the ethenolysis reaction of *Z*-2-butene with catalyst **5**, the nitrate binds to the ruthenium in a bidentate fashion in all four metathesis transition states in the catalytic cycle (Figure 2 in the manuscript). The monodentate TS structures are 1~4 kcal/mol less stable than corresponding bidentate TSs. The 3D structures of the rate-determining transition state **TS22** and the monodentate nitrate isomer (**TS22-mono**) are shown below. The chelating adamantyl groups are not shown for clarity.

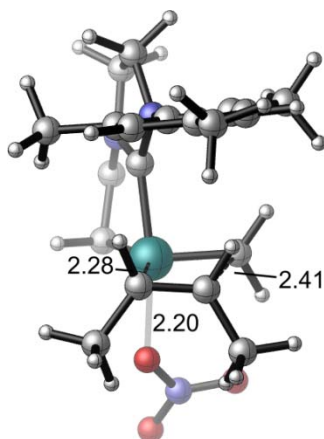

**TS22-mono**  
 $\Delta G^\ddagger = 9.4$  kcal/mol  
 $\Delta H^\ddagger = -2.9$  kcal/mol

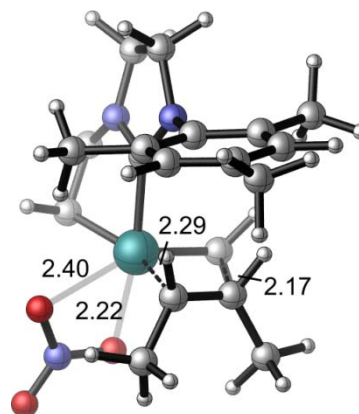

**TS22**  
 $\Delta G^\ddagger = 8.8$  kcal/mol  
 $\Delta H^\ddagger = -5.8$  kcal/mol



**The Cartesian coordinates (Å), SCF energies, enthalpies at 298K, and Gibbs free energies at 298K for the optimized structures.**

**21**  
 B3LYP SCF energy: -1378.80943708 a.u.  
 B3LYP enthalpy: -1378.265763 a.u.  
 B3LYP free energy: -1378.354118 a.u.  
 M06 SCF energy in solution: -1379.29385334 a.u.  
 M06 enthalpy in solution: -1378.750179 a.u.  
 M06 free energy in solution: -1378.838534 a.u.

|   |           |           |           |
|---|-----------|-----------|-----------|
| H | 3.186240  | -0.051666 | -3.308237 |
| H | 1.965875  | 0.811699  | -2.363930 |
| C | -0.261883 | 0.694957  | 2.031838  |
| H | 0.029991  | -0.230924 | 2.539756  |
| O | 1.325983  | 4.517681  | -0.402945 |
| N | 0.806457  | 3.449497  | -0.168269 |
| H | -0.533445 | 1.524256  | 2.701229  |

**Cartesian coordinates**

| ATOM | X         | Y         | Z         |
|------|-----------|-----------|-----------|
| Ru   | -0.221418 | 1.045699  | 0.243937  |
| O    | 1.352359  | 2.324036  | -0.558184 |
| O    | -0.297726 | 3.317514  | 0.459632  |
| N    | -0.964268 | -1.605015 | -0.626983 |
| N    | 1.209359  | -1.639479 | -0.285630 |
| C    | 0.103342  | -0.857736 | -0.238986 |
| C    | -0.628955 | -3.025515 | -0.772929 |
| H    | -1.081353 | -3.459521 | -1.669284 |
| H    | -0.973574 | -3.598781 | 0.098740  |
| C    | 0.908273  | -2.973131 | -0.848922 |
| H    | 1.395351  | -3.763558 | -0.271661 |
| H    | 1.271207  | -3.032358 | -1.883623 |
| C    | -2.299978 | -1.060345 | -0.353653 |
| C    | -2.811052 | -1.536223 | 1.029452  |
| H    | -2.059455 | -1.296431 | 1.788749  |
| H    | -2.942951 | -2.627595 | 1.021662  |
| C    | -4.146559 | -0.845916 | 1.366419  |
| H    | -4.495606 | -1.195140 | 2.347247  |
| C    | -5.188073 | -1.202974 | 0.287028  |
| H    | -5.364972 | -2.287919 | 0.275121  |
| H    | -6.150209 | -0.725176 | 0.516083  |
| C    | -4.681976 | -0.727697 | -1.090604 |
| H    | -5.420086 | -0.980600 | -1.862935 |
| C    | -3.346595 | -1.439324 | -1.425774 |
| H    | -2.984694 | -1.135476 | -2.417004 |
| H    | -3.505234 | -2.527734 | -1.454619 |
| C    | -4.481277 | 0.803561  | -1.046853 |
| H    | -4.159731 | 1.175224  | -2.029193 |
| H    | -5.437886 | 1.293826  | -0.817999 |
| C    | -3.422948 | 1.164754  | 0.030301  |
| H    | -3.272824 | 2.251021  | 0.048468  |
| C    | -2.112089 | 0.471115  | -0.364329 |
| H    | -1.882899 | 0.761426  | -1.416989 |
| C    | -3.922354 | 0.679703  | 1.405035  |
| H    | -3.190265 | 0.933413  | 2.181311  |
| H    | -4.859681 | 1.191777  | 1.662043  |
| C    | 2.569791  | -1.196367 | -0.148358 |
| C    | 3.264708  | -1.513879 | 1.034303  |
| C    | 4.600969  | -1.121890 | 1.146629  |
| H    | 5.142644  | -1.361405 | 2.059284  |
| C    | 5.256611  | -0.430354 | 0.122587  |
| C    | 4.541980  | -0.145244 | -1.043254 |
| H    | 5.036735  | 0.384207  | -1.854850 |
| C    | 3.202172  | -0.514957 | -1.204319 |
| C    | 2.593690  | -2.249893 | 2.170345  |
| H    | 3.295208  | -2.406695 | 2.995123  |
| H    | 2.218278  | -3.234268 | 1.864158  |
| H    | 1.737099  | -1.688086 | 2.558674  |
| C    | 6.691343  | 0.016130  | 0.281250  |
| H    | 6.742784  | 1.044401  | 0.662781  |
| H    | 7.225092  | -0.001118 | -0.675145 |
| H    | 7.235187  | -0.621390 | 0.986354  |
| C    | 2.478040  | -0.150627 | -2.479327 |
| H    | 1.726716  | -0.893901 | -2.763664 |

**23**  
 B3LYP SCF energy: -1536.03762970 a.u.  
 B3LYP enthalpy: -1535.374117 a.u.  
 B3LYP free energy: -1535.472050 a.u.  
 M06 SCF energy in solution: -1536.45146189 a.u.  
 M06 enthalpy in solution: -1535.787949 a.u.  
 M06 free energy in solution: -1535.885882 a.u.

**Cartesian coordinates**

| ATOM | X         | Y         | Z         |
|------|-----------|-----------|-----------|
| Ru   | -0.278681 | 0.951366  | -0.094649 |
| O    | 1.099384  | 1.939049  | -1.528488 |
| O    | -0.556305 | 3.113991  | -0.747766 |
| N    | -0.989926 | -1.842127 | -0.218439 |
| N    | 1.193625  | -1.803733 | 0.010867  |
| C    | 0.079712  | -1.012280 | -0.051054 |
| C    | -0.656005 | -3.262560 | -0.111839 |
| H    | -1.127747 | -3.852557 | -0.904004 |
| H    | -0.980858 | -3.668723 | 0.855868  |
| C    | 0.874947  | -3.227319 | -0.232585 |
| H    | 1.374886  | -3.871021 | 0.496349  |
| H    | 1.217531  | -3.518747 | -1.234312 |
| C    | -2.342501 | -1.297370 | -0.224589 |
| C    | -3.128535 | -1.694188 | 1.051329  |
| H    | -2.554749 | -1.422300 | 1.942791  |
| H    | -3.254641 | -2.785933 | 1.072526  |
| C    | -4.513810 | -1.014027 | 1.054664  |
| H    | -5.051187 | -1.299792 | 1.968226  |
| C    | -5.309046 | -1.477064 | -0.182354 |
| H    | -5.461386 | -2.565136 | -0.152180 |
| H    | -6.305176 | -1.015011 | -0.184896 |
| C    | -4.539826 | -1.082115 | -1.459105 |
| H    | -5.100318 | -1.407243 | -2.345203 |
| C    | -3.159862 | -1.780901 | -1.456679 |
| H    | -2.603129 | -1.551377 | -2.374326 |
| H    | -3.296402 | -2.871489 | -1.421153 |
| C    | -4.363481 | 0.452100  | -1.494333 |
| H    | -3.856170 | 0.758905  | -2.418593 |
| H    | -5.347342 | 0.941010  | -1.493855 |
| C    | -3.546643 | 0.917671  | -0.253111 |
| H    | -3.410668 | 2.004240  | -0.291311 |
| C    | -2.182372 | 0.224514  | -0.357769 |
| H    | -1.801206 | 0.432766  | -1.404672 |
| C    | -4.337852 | 0.517299  | 1.011262  |
| H    | -3.837781 | 0.874935  | 1.915494  |
| H    | -5.323662 | 1.001766  | 0.985035  |
| C    | 2.563261  | -1.396707 | -0.151354 |
| C    | 3.441334  | -1.530015 | 0.943834  |
| C    | 4.784201  | -1.188079 | 0.769064  |
| H    | 5.462567  | -1.280026 | 1.614835  |
| C    | 5.277265  | -0.732600 | -0.458773 |
| C    | 4.390076  | -0.649843 | -1.533422 |
| H    | 4.758500  | -0.322232 | -2.503373 |
| C    | 3.034996  | -0.981990 | -1.410992 |

|   |           |           |           |
|---|-----------|-----------|-----------|
| C | 2.961613  | -2.039262 | 2.283262  |
| H | 3.725597  | -1.883740 | 3.050914  |
| H | 2.743667  | -3.115523 | 2.255546  |
| H | 2.046172  | -1.534183 | 2.604226  |
| C | 6.725921  | -0.331403 | -0.612090 |
| H | 6.871870  | 0.725394  | -0.352076 |
| H | 7.071346  | -0.462460 | -1.642982 |
| H | 7.377546  | -0.919874 | 0.043023  |
| C | 2.141935  | -0.887458 | -2.626661 |
| H | 1.318521  | -1.607384 | -2.597426 |
| H | 2.720699  | -1.072629 | -3.537722 |
| H | 1.703490  | 0.112780  | -2.707152 |
| C | -1.089136 | 1.108761  | 1.896867  |
| C | 1.137457  | 1.366942  | 1.476790  |
| C | 0.233377  | 0.945504  | 2.627711  |
| H | -1.463244 | 2.140962  | 1.909947  |
| H | -1.874242 | 0.437962  | 2.236703  |
| H | 0.383143  | -0.127165 | 2.812293  |
| H | 1.985989  | 0.702530  | 1.299904  |
| C | 1.597186  | 2.818366  | 1.466081  |
| H | 2.250672  | 3.008125  | 2.332144  |
| H | 2.181783  | 3.042355  | 0.568995  |
| H | 0.766971  | 3.530150  | 1.519260  |
| C | 0.354969  | 1.676760  | 3.974012  |
| H | -0.391355 | 1.297256  | 4.683586  |
| H | 1.346432  | 1.532298  | 4.423041  |
| H | 0.189754  | 2.754294  | 3.864711  |
| N | 0.450288  | 3.068326  | -1.535900 |
| O | 0.788558  | 3.994837  | -2.242538 |

#### 24

B3LYP SCF energy: -1536.03033809 a.u.  
 B3LYP enthalpy: -1535.366408 a.u.  
 B3LYP free energy: -1535.464862 a.u.  
 M06 SCF energy in solution: -1536.44322417 a.u.  
 M06 enthalpy in solution: -1535.779294 a.u.  
 M06 free energy in solution: -1535.877748 a.u.

#### Cartesian coordinates

| ATOM | X         | Y         | Z         |
|------|-----------|-----------|-----------|
| Ru   | 0.412524  | 0.823417  | 0.007527  |
| O    | 0.065171  | 1.658132  | -2.020255 |
| O    | 1.259606  | 2.860394  | -0.656685 |
| N    | 0.771300  | -1.962358 | 0.102984  |
| N    | -1.399606 | -1.745059 | -0.164076 |
| C    | -0.244230 | -1.052741 | 0.022711  |
| C    | 0.359108  | -3.301202 | -0.327614 |
| H    | 0.793524  | -4.081761 | 0.302843  |
| H    | 0.658552  | -3.491327 | -1.368713 |
| C    | -1.169529 | -3.205923 | -0.181571 |
| H    | -1.711907 | -3.668094 | -1.011191 |
| H    | -1.516864 | -3.661038 | 0.754027  |
| C    | 2.139210  | -1.426428 | 0.019764  |
| C    | 2.554471  | -1.149450 | -1.452823 |
| H    | 1.820161  | -0.491666 | -1.939740 |
| H    | 2.556813  | -2.092703 | -2.018004 |
| C    | 3.952449  | -0.499083 | -1.495829 |
| H    | 4.230741  | -0.315074 | -2.541447 |
| C    | 4.977182  | -1.448492 | -0.843151 |
| H    | 5.030439  | -2.394564 | -1.400292 |
| H    | 5.979094  | -1.000171 | -0.877899 |
| C    | 4.570860  | -1.714009 | 0.621144  |
| H    | 5.297528  | -2.390034 | 1.090492  |
| C    | 3.177213  | -2.383007 | 0.649363  |
| H    | 2.878984  | -2.619238 | 1.679021  |
| H    | 3.213076  | -3.330546 | 0.090583  |
| C    | 4.535866  | -0.375032 | 1.390262  |
| H    | 4.284233  | -0.548058 | 2.445285  |
| H    | 5.531763  | 0.089227  | 1.369206  |
| C    | 3.494052  | 0.577422  | 0.740312  |
| H    | 3.478542  | 1.528045  | 1.284479  |

|   |           |           |           |
|---|-----------|-----------|-----------|
| C | 2.123244  | -0.114475 | 0.859341  |
| H | 1.976979  | -0.416216 | 1.897482  |
| C | 3.910299  | 0.833186  | -0.723026 |
| H | 3.216929  | 1.535867  | -1.194943 |
| H | 4.901458  | 1.306644  | -0.743472 |
| C | -2.728199 | -1.218261 | -0.285661 |
| C | -3.152422 | -0.694363 | -1.524176 |
| C | -4.461804 | -0.213708 | -1.625452 |
| H | -4.794233 | 0.193498  | -2.578125 |
| C | -5.354897 | -0.252249 | -0.549807 |
| C | -4.914214 | -0.813369 | 0.651333  |
| H | -5.598515 | -0.869940 | 1.495550  |
| C | -3.614403 | -1.307675 | 0.805643  |
| C | -2.243908 | -0.653133 | -2.730244 |
| H | -2.834650 | -0.575853 | -3.648474 |
| H | -1.622641 | -1.552485 | -2.801084 |
| H | -1.565605 | 0.206169  | -2.697768 |
| C | -6.752394 | 0.306433  | -0.683845 |
| H | -6.757951 | 1.395107  | -0.541105 |
| H | -7.430376 | -0.124566 | 0.060093  |
| H | -7.168608 | 0.109564  | -1.677989 |
| C | -3.213332 | -1.943010 | 2.118640  |
| H | -3.403979 | -3.025068 | 2.112417  |
| H | -3.793856 | -1.521360 | 2.945147  |
| H | -2.152702 | -1.796567 | 2.341670  |
| C | -1.231525 | 1.946327  | 0.676008  |
| C | 0.069960  | 0.953594  | 2.200299  |
| H | 0.182321  | -0.021498 | 2.686922  |
| C | -1.398013 | 1.385143  | 2.059662  |
| H | -2.015964 | 0.485507  | 1.999248  |
| H | -2.001829 | 1.735277  | -0.074052 |
| C | -2.004928 | 2.313678  | 3.122046  |
| H | -3.048921 | 2.543076  | 2.874276  |
| H | -1.992219 | 1.846111  | 4.115164  |
| H | -1.464456 | 3.264140  | 3.190682  |
| C | 0.980338  | 1.987558  | 2.850147  |
| H | 0.654001  | 2.199602  | 3.879807  |
| H | 2.016096  | 1.642245  | 2.912672  |
| H | 0.982973  | 2.939865  | 2.306607  |
| H | -0.915999 | 2.994266  | 0.646801  |
| N | 0.723268  | 2.764977  | -1.812824 |
| O | 0.816296  | 3.620721  | -2.668163 |

#### 26

B3LYP SCF energy: -1536.02641534 a.u.  
 B3LYP enthalpy: -1535.364599 a.u.  
 B3LYP free energy: -1535.470096 a.u.  
 M06 SCF energy in solution: -1536.43822690 a.u.  
 M06 enthalpy in solution: -1535.776411 a.u.  
 M06 free energy in solution: -1535.881908 a.u.

#### Cartesian coordinates

| ATOM | X         | Y         | Z         |
|------|-----------|-----------|-----------|
| Ru   | 0.296125  | 0.866820  | 0.281549  |
| O    | 1.071631  | 1.704964  | -1.771191 |
| O    | 1.194432  | 2.911060  | 0.033813  |
| N    | 0.764258  | -1.984588 | 0.226704  |
| N    | -1.412955 | -1.792024 | 0.091567  |
| C    | -0.249087 | -1.080477 | 0.177775  |
| C    | 0.333194  | -3.358999 | -0.041014 |
| H    | 0.797609  | -4.067077 | 0.650753  |
| H    | 0.594290  | -3.660358 | -1.065232 |
| C    | -1.185984 | -3.250626 | 0.157079  |
| H    | -1.760343 | -3.766766 | -0.617806 |
| H    | -1.502801 | -3.640761 | 1.133456  |
| C    | 2.145258  | -1.506249 | 0.080735  |
| C    | 2.550286  | -1.469847 | -1.416003 |
| H    | 1.836083  | -0.850045 | -1.970287 |
| H    | 2.510678  | -2.484617 | -1.838907 |
| C    | 3.972792  | -0.895117 | -1.565889 |
| H    | 4.248522  | -0.890333 | -2.628671 |

|   |           |           |           |
|---|-----------|-----------|-----------|
| C | 4.968837  | -1.764278 | -0.774147 |
| H | 4.982441  | -2.790579 | -1.169329 |
| H | 5.986396  | -1.365813 | -0.885603 |
| C | 4.564994  | -1.772972 | 0.714307  |
| H | 5.275767  | -2.383292 | 1.287567  |
| C | 3.153770  | -2.392819 | 0.846897  |
| H | 2.855234  | -2.458148 | 1.901916  |
| H | 3.168457  | -3.417665 | 0.445624  |
| C | 4.574511  | -0.323092 | 1.251655  |
| H | 4.332204  | -0.314668 | 2.323282  |
| H | 5.584891  | 0.098211  | 1.149620  |
| C | 3.550878  | 0.541315  | 0.463265  |
| H | 3.560532  | 1.565482  | 0.854306  |
| C | 2.162520  | -0.093228 | 0.705260  |
| H | 2.092913  | -0.246609 | 1.787816  |
| C | 3.982900  | 0.545769  | -1.019607 |
| H | 3.323033  | 1.168933  | -1.625518 |
| H | 4.994224  | 0.968256  | -1.101753 |
| C | -2.745061 | -1.303838 | -0.096965 |
| C | -3.190766 | -1.052820 | -1.413022 |
| C | -4.509903 | -0.636377 | -1.603498 |
| H | -4.854557 | -0.432592 | -2.615193 |
| C | -5.399099 | -0.479400 | -0.532657 |
| C | -4.939387 | -0.772352 | 0.752461  |
| H | -5.620955 | -0.677494 | 1.595700  |
| C | -3.625202 | -1.196431 | 0.994129  |
| C | -2.272238 | -1.247250 | -2.598407 |
| H | -2.774838 | -0.961311 | -3.527093 |
| H | -1.962741 | -2.295504 | -2.698713 |
| H | -1.355995 | -0.653423 | -2.510829 |
| C | -6.810903 | 0.005518  | -0.766406 |
| H | -6.838809 | 1.096009  | -0.891479 |
| H | -7.465720 | -0.245059 | 0.074379  |
| H | -7.240238 | -0.433419 | -1.673961 |
| C | -3.212595 | -1.570110 | 2.399582  |
| H | -2.131263 | -1.508231 | 2.540765  |
| H | -3.518463 | -2.598266 | 2.636739  |
| H | -3.692836 | -0.917524 | 3.136477  |
| C | -1.740369 | 2.115360  | -0.911239 |
| H | -2.067238 | 1.231601  | -1.441388 |
| C | -0.219031 | 0.969259  | 2.061333  |
| H | -1.040248 | 0.388313  | 2.509993  |
| C | -2.168448 | 2.381188  | 0.342340  |
| H | -2.805167 | 1.651592  | 0.840063  |
| C | -1.962271 | 3.694382  | 1.045050  |
| H | -2.884856 | 4.289736  | 0.988961  |
| H | -1.735587 | 3.561616  | 2.107886  |
| H | -1.151160 | 4.267589  | 0.587943  |
| H | -1.187608 | 2.853331  | -1.483167 |
| C | 0.439803  | 1.876479  | 3.057687  |
| H | -0.292604 | 2.419694  | 3.673567  |
| H | 1.019500  | 1.247608  | 3.756377  |
| H | 1.128404  | 2.590669  | 2.597644  |
| O | 1.984760  | 3.699584  | -1.854870 |
| N | 1.440180  | 2.807761  | -1.225456 |

## 27

B3LYP SCF energy: -1418.12464492 a.u.  
 B3LYP enthalpy: -1417.550645 a.u.  
 B3LYP free energy: -1417.643262 a.u.  
 M06 SCF energy in solution: -1418.58692432 a.u.  
 M06 enthalpy in solution: -1418.012924 a.u.  
 M06 free energy in solution: -1418.105541 a.u.

### Cartesian coordinates

| ATOM | X         | Y         | Z         |
|------|-----------|-----------|-----------|
| Ru   | -0.309338 | 0.900446  | -0.522082 |
| O    | 0.487957  | 2.429573  | 0.835372  |
| O    | -0.897750 | 3.130949  | -0.687820 |
| N    | -0.784329 | -1.741242 | 0.440211  |
| N    | 1.396130  | -1.486276 | 0.524969  |

|   |           |           |           |
|---|-----------|-----------|-----------|
| C | 0.235095  | -0.888600 | 0.154146  |
| C | -0.360481 | -2.859461 | 1.285423  |
| H | -0.823146 | -3.800725 | 0.975854  |
| H | -0.618155 | -2.679042 | 2.339351  |
| C | 1.164874  | -2.845468 | 1.059721  |
| H | 1.737358  | -2.999635 | 1.978760  |
| H | 1.474503  | -3.603926 | 0.329794  |
| C | -2.145785 | -1.211769 | 0.276675  |
| C | -2.595958 | -0.420799 | 1.533613  |
| H | -1.845587 | 0.346550  | 1.778500  |
| H | -2.653051 | -1.093356 | 2.401866  |
| C | -3.964845 | 0.240755  | 1.277177  |
| H | -4.274893 | 0.791076  | 2.175025  |
| C | -5.001608 | -0.855573 | 0.954539  |
| H | -5.112114 | -1.537034 | 1.810039  |
| H | -5.985901 | -0.400969 | 0.779458  |
| C | -4.553094 | -1.637411 | -0.297389 |
| H | -5.291036 | -2.416588 | -0.529218 |
| C | -3.186796 | -2.310329 | -0.018493 |
| H | -2.862574 | -2.899490 | -0.886493 |
| H | -3.284108 | -3.002347 | 0.831963  |
| C | -4.438527 | -0.659303 | -1.488801 |
| H | -4.151355 | -1.202984 | -2.399074 |
| H | -5.419293 | -0.202742 | -1.684205 |
| C | -3.387739 | 0.436620  | -1.170824 |
| H | -3.308783 | 1.126892  | -2.019871 |
| C | -2.036361 | -0.264432 | -0.947590 |
| H | -1.831778 | -0.897963 | -1.816691 |
| C | -3.840194 | 1.211293  | 0.084361  |
| H | -3.124752 | 2.011922  | 0.310616  |
| H | -4.807985 | 1.696290  | -0.103590 |
| C | 2.722844  | -0.991486 | 0.292092  |
| C | 3.304048  | -0.110938 | 1.224032  |
| C | 4.607184  | 0.339364  | 0.985540  |
| H | 5.060754  | 1.022505  | 1.700561  |
| C | 5.339204  | -0.061003 | -0.135469 |
| C | 4.741453  | -0.956291 | -1.027755 |
| H | 5.299005  | -1.291692 | -1.900218 |
| C | 3.443100  | -1.437069 | -0.834021 |
| C | 2.561629  | 0.358025  | 2.452812  |
| H | 3.266332  | 0.694956  | 3.219773  |
| H | 1.941843  | -0.435261 | 2.883804  |
| H | 1.899569  | 1.197944  | 2.215203  |
| C | 6.730435  | 0.472382  | -0.387360 |
| H | 6.699322  | 1.379472  | -1.005492 |
| H | 7.351993  | -0.259060 | -0.915153 |
| H | 7.234620  | 0.735135  | 0.548591  |
| C | 2.863406  | -2.431849 | -1.815122 |
| H | 3.026728  | -3.466015 | -1.481812 |
| H | 3.342560  | -2.333369 | -2.794255 |
| H | 1.785691  | -2.300509 | -1.950344 |
| C | 0.502647  | 0.715441  | -2.148157 |
| H | 1.185949  | -0.114118 | -2.369857 |
| O | -0.032898 | 4.563348  | 0.733592  |
| N | -0.151011 | 3.437116  | 0.301248  |
| C | 0.360019  | 1.702140  | -3.271811 |
| H | 1.344308  | 2.100371  | -3.562942 |
| H | -0.045254 | 1.190314  | -4.159748 |
| H | -0.293869 | 2.541897  | -3.022839 |

## 28

B3LYP SCF energy: -1496.70937437 a.u.  
 B3LYP enthalpy: -1496.077119 a.u.  
 B3LYP free energy: -1496.177201 a.u.  
 M06 SCF energy in solution: -1497.14232971 a.u.  
 M06 enthalpy in solution: -1496.510074 a.u.  
 M06 free energy in solution: -1496.610156 a.u.

### Cartesian coordinates

| ATOM | X        | Y        | Z        |
|------|----------|----------|----------|
| Ru   | 0.269356 | 0.967328 | 0.331471 |

|   |           |           |           |                              |                     |           |           |
|---|-----------|-----------|-----------|------------------------------|---------------------|-----------|-----------|
| O | 1.211557  | 1.863815  | -1.638205 | B3LYP SCF energy:            | -1496.71777081 a.u. |           |           |
| O | 1.268850  | 2.971326  | 0.231838  | B3LYP enthalpy:              | -1496.083214 a.u.   |           |           |
| N | 0.612882  | -1.900801 | 0.135854  | B3LYP free energy:           | -1496.178109 a.u.   |           |           |
| N | -1.552820 | -1.602800 | 0.015801  | M06 SCF energy in solution:  | -1497.15197226 a.u. |           |           |
| C | -0.356078 | -0.948303 | 0.134593  | M06 enthalpy in solution:    | -1496.517415 a.u.   |           |           |
| C | 0.119115  | -3.239650 | -0.196314 | M06 free energy in solution: | -1496.612310 a.u.   |           |           |
| H | 0.549461  | -4.000382 | 0.460736  |                              |                     |           |           |
| H | 0.369094  | -3.503202 | -1.233442 |                              |                     |           |           |
| C | -1.393203 | -3.071668 | 0.005377  | Cartesian coordinates        |                     |           |           |
| H | -1.987927 | -3.520871 | -0.795481 | ATOM                         | X                   | Y         | Z         |
| H | -1.733266 | -3.496324 | 0.959583  | Ru                           | 0.351748            | 0.906896  | 0.224345  |
| C | 2.018613  | -1.490648 | 0.021373  | O                            | -0.722724           | 2.104326  | -1.391838 |
| C | 2.447379  | -1.427207 | -1.467397 | O                            | 1.008873            | 2.951152  | -0.389685 |
| H | 1.776940  | -0.749371 | -2.008258 | N                            | 0.724081            | -1.995267 | 0.297015  |
| H | 2.358330  | -2.422955 | -1.926599 | N                            | -1.444760           | -1.682551 | 0.174337  |
| C | 3.902604  | -0.928870 | -1.577378 | C                            | -0.246879           | -1.035116 | 0.273303  |
| H | 4.195011  | -0.906047 | -2.635552 | C                            | 0.221854            | -3.326549 | -0.050126 |
| C | 4.836373  | -1.877637 | -0.801048 | H                            | 0.668440            | -4.101597 | 0.578851  |
| H | 4.798356  | -2.890492 | -1.228261 | H                            | 0.437826            | -3.568942 | -1.100603 |
| H | 5.876160  | -1.533979 | -0.886694 | C                            | -1.282199           | -3.153348 | 0.197751  |
| C | 4.409727  | -1.909528 | 0.680720  | H                            | -1.905872           | -3.617220 | -0.571139 |
| H | 5.077212  | -2.575389 | 1.244248  | H                            | -1.581199           | -3.554504 | 1.173786  |
| C | 2.965626  | -2.456419 | 0.771183  | C                            | 2.065186            | -1.510433 | -0.032260 |
| H | 2.645986  | -2.540403 | 1.818728  | C                            | 2.215955            | -1.350249 | -1.570524 |
| H | 2.933315  | -3.466970 | 0.335916  | H                            | 1.391412            | -0.732979 | -1.954802 |
| C | 4.488802  | -0.480039 | 1.265026  | H                            | 2.137015            | -2.331804 | -2.059245 |
| H | 4.229462  | -0.493127 | 2.332707  | C                            | 3.566303            | -0.697856 | -1.909732 |
| H | 5.522521  | -0.112586 | 1.192298  | H                            | 3.660939            | -0.597839 | -2.998942 |
| C | 3.526799  | 0.463762  | 0.490451  | C                            | 4.705826            | -1.584563 | -1.367310 |
| H | 3.586576  | 1.472827  | 0.915562  | H                            | 4.682816            | -2.569502 | -1.855010 |
| C | 2.101111  | -0.102181 | 0.689613  | H                            | 5.679475            | -1.134541 | -1.603712 |
| H | 2.009407  | -0.287167 | 1.766465  | C                            | 4.555961            | -1.740166 | 0.160493  |
| C | 3.986461  | 0.490520  | -0.984298 | H                            | 5.368693            | -2.367664 | 0.549021  |
| H | 3.376736  | 1.172249  | -1.578936 | C                            | 3.201237            | -2.419459 | 0.480476  |
| H | 5.023021  | 0.852823  | -1.034407 | H                            | 3.090353            | -2.573754 | 1.561651  |
| C | -2.868850 | -1.054353 | -0.115176 | H                            | 3.163283            | -3.409335 | 0.001027  |
| C | -3.349642 | -0.763666 | -1.411941 | C                            | 4.625080            | -0.340011 | 0.810169  |
| C | -4.652475 | -0.282712 | -1.550400 | H                            | 4.567750            | -0.422186 | 1.903803  |
| H | -5.022323 | -0.048445 | -2.546506 | H                            | 5.591774            | 0.126971  | 0.573444  |
| C | -5.495976 | -0.099636 | -0.446089 | C                            | 3.463506            | 0.546729  | 0.282455  |
| C | -5.007153 | -0.436000 | 0.816359  | H                            | 3.525926            | 1.537688  | 0.738126  |
| H | -5.655088 | -0.325692 | 1.684066  | C                            | 2.148929            | -0.153928 | 0.696056  |
| C | -3.706403 | -0.925677 | 1.006130  | H                            | 2.202665            | -0.380187 | 1.764318  |
| C | -2.483944 | -0.983811 | -2.632091 | C                            | 3.611308            | 0.691179  | -1.247298 |
| H | -2.999139 | -0.647680 | -3.536775 | H                            | 2.817930            | 1.334365  | -1.649715 |
| H | -2.241278 | -2.045778 | -2.766163 | H                            | 4.562593            | 1.190262  | -1.477471 |
| H | -1.531160 | -0.448079 | -2.563694 | C                            | -2.754577           | -1.138913 | -0.049349 |
| C | -6.890545 | 0.453800  | -0.624328 | C                            | -3.092953           | -0.659538 | -1.330858 |
| H | -6.868827 | 1.542678  | -0.763255 | C                            | -4.389614           | -0.177089 | -1.536610 |
| H | -7.519060 | 0.246316  | 0.247581  | H                            | -4.653698           | 0.199794  | -2.522436 |
| H | -7.381113 | 0.026756  | -1.506245 | C                            | -5.353548           | -0.176213 | -0.524393 |
| C | -3.272250 | -1.336640 | 2.395199  | C                            | -4.998588           | -0.701693 | 0.720968  |
| H | -2.206072 | -1.565639 | 2.441865  | H                            | -5.738857           | -0.729106 | 1.518143  |
| H | -3.822677 | -2.227447 | 2.724849  | C                            | -3.715541           | -1.193648 | 0.979003  |
| H | -3.481892 | -0.546357 | 3.125336  | C                            | -2.113538           | -0.674627 | -2.480759 |
| C | -1.591706 | 2.185331  | -0.780161 | H                            | -2.648008           | -0.622428 | -3.434494 |
| H | -2.119695 | 1.432914  | -1.349563 | H                            | -1.502891           | -1.584258 | -2.484384 |
| C | -0.290853 | 1.020341  | 2.111376  | H                            | -1.433538           | 0.182467  | -2.436969 |
| H | -1.051832 | 0.361131  | 2.553546  | C                            | -6.734469           | 0.386080  | -0.768582 |
| C | -1.881999 | 2.396858  | 0.533377  | H                            | -6.752660           | 1.471908  | -0.606315 |
| H | -2.635903 | 1.805351  | 1.042521  | H                            | -7.474058           | -0.057341 | -0.093581 |
| O | 2.245823  | 3.797399  | -1.551028 | H                            | -7.063499           | 0.208009  | -1.798181 |
| N | 1.601883  | 2.913471  | -1.011128 | C                            | -3.404843           | -1.778219 | 2.338631  |
| H | -0.993147 | 2.891625  | -1.341945 | H                            | -3.584658           | -2.861869 | 2.359267  |
| C | 0.257220  | 1.992757  | 3.113823  | H                            | -4.045030           | -1.332973 | 3.106643  |
| H | 0.837864  | 1.420083  | 3.857046  | H                            | -2.362709           | -1.615165 | 2.629293  |
| H | 0.917308  | 2.742730  | 2.670018  | C                            | -1.361071           | 1.282435  | 1.403701  |
| H | -0.544129 | 2.495747  | 3.676457  | C                            | 0.695076            | 1.429364  | 2.328036  |
| H | -1.495837 | 3.266955  | 1.055106  | C                            | -0.633384           | 2.165571  | 2.385642  |
|   |           |           |           | H                            | -1.780611           | 0.398463  | 1.876009  |
|   |           |           |           | H                            | -1.078827           | 2.222883  | 3.395127  |
|   |           |           |           | H                            | 0.648653            | 0.503532  | 2.910414  |
|   |           |           |           | C                            | 1.913224            | 2.258233  | 2.691535  |
|   |           |           |           | H                            | 2.832336            | 1.669577  | 2.761396  |

|   |           |          |           |
|---|-----------|----------|-----------|
| H | 2.072815  | 3.077914 | 1.982047  |
| H | 1.747878  | 2.713188 | 3.681732  |
| H | -2.071738 | 1.738172 | 0.709326  |
| N | 0.110024  | 3.088769 | -1.304308 |
| O | 0.051450  | 4.061093 | -2.025826 |
| H | -0.525262 | 3.189506 | 2.009364  |

**31**

B3LYP SCF energy: -1496.72453047 a.u.  
 B3LYP enthalpy: -1496.090787 a.u.  
 B3LYP free energy: -1496.186569 a.u.  
 M06 SCF energy in solution: -1497.15895055 a.u.  
 M06 enthalpy in solution: -1496.525207 a.u.  
 M06 free energy in solution: -1496.620989 a.u.

Cartesian coordinates

| ATOM | X         | Y         | Z         |
|------|-----------|-----------|-----------|
| Ru   | -0.275328 | 0.985587  | 0.128628  |
| O    | 1.037735  | 2.152996  | -1.242456 |
| O    | -0.451372 | 3.235119  | -0.083003 |
| N    | -1.023961 | -1.757051 | -0.426659 |
| N    | 1.154841  | -1.769600 | -0.175745 |
| C    | 0.049081  | -0.968589 | -0.134332 |
| C    | -0.699139 | -3.181817 | -0.511408 |
| H    | -1.177665 | -3.658314 | -1.372647 |
| H    | -1.022386 | -3.710618 | 0.395601  |
| C    | 0.830653  | -3.138256 | -0.631204 |
| H    | 1.329794  | -3.886710 | -0.010073 |
| H    | 1.168370  | -3.274940 | -1.667160 |
| C    | -2.369340 | -1.213547 | -0.300335 |
| C    | -3.105573 | -1.793900 | 0.935517  |
| H    | -2.501458 | -1.632042 | 1.834598  |
| H    | -3.221167 | -2.879712 | 0.811778  |
| C    | -4.490830 | -1.136569 | 1.090033  |
| H    | -4.994534 | -1.564751 | 1.966400  |
| C    | -5.333842 | -1.397740 | -0.173322 |
| H    | -5.490452 | -2.476796 | -0.312147 |
| H    | -6.326740 | -0.941669 | -0.063556 |
| C    | -4.609787 | -0.803057 | -1.397879 |
| H    | -5.205043 | -0.979717 | -2.303088 |
| C    | -3.237969 | -1.497658 | -1.558323 |
| H    | -2.714785 | -1.130862 | -2.450581 |
| H    | -3.383608 | -2.580277 | -1.686621 |
| C    | -4.422731 | 0.717152  | -1.192447 |
| H    | -3.949647 | 1.167703  | -2.074883 |
| H    | -5.402330 | 1.200071  | -1.073964 |
| C    | -3.554310 | 0.975514  | 0.073988  |
| H    | -3.412389 | 2.054544  | 0.205757  |
| C    | -2.199353 | 0.308540  | -0.195273 |
| H    | -1.851643 | 0.685191  | -1.204323 |
| C    | -4.303825 | 0.378967  | 1.287039  |
| H    | -3.765243 | 0.571168  | 2.218765  |
| H    | -5.283218 | 0.868239  | 1.378557  |
| C    | 2.531615  | -1.361495 | -0.203312 |
| C    | 3.350408  | -1.674892 | 0.900847  |
| C    | 4.699120  | -1.314124 | 0.854703  |
| H    | 5.332196  | -1.541887 | 1.709894  |
| C    | 5.255209  | -0.672252 | -0.257338 |
| C    | 4.427441  | -0.419908 | -1.353374 |
| H    | 4.847284  | 0.051278  | -2.239723 |
| C    | 3.068882  | -0.760214 | -1.357081 |
| C    | 2.810349  | -2.408808 | 2.107258  |
| H    | 3.495849  | -2.315713 | 2.955030  |
| H    | 2.690262  | -3.482369 | 1.905548  |
| H    | 1.831812  | -2.028723 | 2.415499  |
| C    | 6.707212  | -0.254570 | -0.265808 |
| H    | 6.833723  | 0.738341  | 0.185736  |
| H    | 7.103134  | -0.200304 | -1.285340 |
| H    | 7.329994  | -0.952108 | 0.304928  |
| C    | 2.240233  | -0.478722 | -2.589311 |
| H    | 1.429504  | -1.201855 | -2.721196 |

|   |           |           |           |
|---|-----------|-----------|-----------|
| H | 2.869947  | -0.511236 | -3.484579 |
| H | 1.787531  | 0.516520  | -2.535987 |
| H | -1.069631 | 0.944487  | 2.138797  |
| C | 1.168078  | 1.112895  | 1.719556  |
| C | 0.161107  | 1.606259  | 2.736417  |
| H | 1.482308  | 0.094409  | 1.951529  |
| H | 0.376827  | 1.334741  | 3.784991  |
| H | -1.241984 | -0.061191 | 2.528332  |
| H | -1.981869 | 1.538880  | 2.201318  |
| C | 2.370025  | 1.999719  | 1.438563  |
| H | 2.075586  | 3.033933  | 1.229391  |
| H | 3.007679  | 2.024672  | 2.338267  |
| H | 2.983944  | 1.639484  | 0.609303  |
| N | 0.472012  | 3.291574  | -0.969884 |
| O | 0.805242  | 4.320610  | -1.519245 |
| H | 0.073252  | 2.698041  | 2.686812  |

**34**

B3LYP SCF energy: -1536.04068799 a.u.  
 B3LYP enthalpy: -1535.377028 a.u.  
 B3LYP free energy: -1535.474688 a.u.  
 M06 SCF energy in solution: -1536.45461758 a.u.  
 M06 enthalpy in solution: -1535.790958 a.u.  
 M06 free energy in solution: -1535.888618 a.u.

Cartesian coordinates

| ATOM | X         | Y         | Z         |
|------|-----------|-----------|-----------|
| Ru   | -0.290743 | 0.952299  | -0.101232 |
| O    | 0.984821  | 1.971680  | -1.629344 |
| O    | -0.487492 | 3.160801  | -0.556390 |
| N    | -1.041191 | -1.832796 | -0.360926 |
| N    | 1.139806  | -1.819906 | -0.130569 |
| C    | 0.034192  | -1.018852 | -0.159322 |
| C    | -0.715955 | -3.259257 | -0.311622 |
| H    | -1.195985 | -3.814290 | -1.123665 |
| H    | -1.037505 | -3.701396 | 0.641175  |
| C    | 0.814059  | -3.228433 | -0.438265 |
| H    | 1.314353  | -3.907648 | 0.257427  |
| H    | 1.150319  | -3.474235 | -1.454324 |
| C    | -2.385953 | -1.280600 | -0.264555 |
| C    | -3.094481 | -1.734794 | 1.038265  |
| H    | -2.470573 | -1.483504 | 1.902704  |
| H    | -3.209678 | -2.827600 | 1.026669  |
| C    | -4.478381 | -1.066579 | 1.154584  |
| H    | -4.963456 | -1.404628 | 2.079458  |
| C    | -5.344313 | -1.456288 | -0.059589 |
| H    | -5.498653 | -2.544252 | -0.085050 |
| H    | -6.337174 | -0.994502 | 0.023193  |
| C    | -4.647787 | -0.987588 | -1.352995 |
| H    | -5.260987 | -1.256439 | -2.222888 |
| C    | -3.276472 | -1.691560 | -1.470688 |
| H    | -2.771767 | -1.413686 | -2.404843 |
| H    | -3.419296 | -2.781848 | -1.487464 |
| C    | -4.461490 | 0.545558  | -1.307533 |
| H    | -4.005406 | 0.903295  | -2.240076 |
| H    | -5.439792 | 1.037994  | -1.221659 |
| C    | -3.570528 | 0.932887  | -0.090639 |
| H    | -3.430740 | 2.020017  | -0.071731 |
| C    | -2.218579 | 0.244569  | -0.317095 |
| H    | -1.892743 | 0.516889  | -1.365901 |
| C    | -4.293559 | 0.461429  | 1.191986  |
| H    | -3.737645 | 0.750551  | 2.088020  |
| H    | -5.272857 | 0.955775  | 1.252312  |
| C    | 2.518195  | -1.421718 | -0.194269 |
| C    | 3.330427  | -1.621358 | 0.940434  |
| C    | 4.682329  | -1.277445 | 0.862579  |
| H    | 5.309881  | -1.416772 | 1.740562  |
| C    | 5.248463  | -0.764647 | -0.309250 |
| C    | 4.426078  | -0.622101 | -1.429297 |
| H    | 4.852825  | -0.250827 | -2.358843 |
| C    | 3.064636  | -0.948746 | -1.402620 |

|   |           |           |           |
|---|-----------|-----------|-----------|
| C | 2.781920  | -2.219373 | 2.215964  |
| H | 3.417913  | -1.962766 | 3.068696  |
| H | 2.744953  | -3.316488 | 2.160716  |
| H | 1.766969  | -1.871905 | 2.428085  |
| C | 6.704785  | -0.364758 | -0.357623 |
| H | 6.835150  | 0.685146  | -0.063477 |
| H | 7.116776  | -0.471988 | -1.366654 |
| H | 7.311028  | -0.970917 | 0.324196  |
| C | 2.243997  | -0.790378 | -2.661889 |
| H | 1.411264  | -1.498578 | -2.709354 |
| H | 2.871941  | -0.947981 | -3.545190 |
| H | 1.821469  | 0.217318  | -2.728983 |
| C | -1.048780 | 1.133623  | 1.910264  |
| C | 1.173649  | 1.250124  | 1.442319  |
| C | 0.191992  | 1.841466  | 2.436599  |
| H | 1.504918  | 0.264927  | 1.777391  |
| H | -1.226011 | 0.176236  | 2.407884  |
| H | -1.956082 | 1.739762  | 1.918061  |
| C | 2.360741  | 2.104601  | 1.025763  |
| H | 2.052770  | 3.109516  | 0.716508  |
| H | 3.035189  | 2.226093  | 1.889647  |
| H | 2.941480  | 1.656176  | 0.215830  |
| N | 0.413403  | 3.127334  | -1.468172 |
| O | 0.720053  | 4.093582  | -2.134860 |
| H | 0.096299  | 2.917960  | 2.240306  |
| C | 0.507165  | 1.634535  | 3.925384  |
| H | 1.442985  | 2.132747  | 4.209400  |
| H | -0.292397 | 2.037638  | 4.560154  |
| H | 0.611635  | 0.566189  | 4.156974  |

### 34'

B3LYP SCF energy: -1536.03280947 a.u.  
 B3LYP enthalpy: -1535.368807 a.u.  
 B3LYP free energy: -1535.465833 a.u.  
 M06 SCF energy in solution: -1536.45265636 a.u.  
 M06 enthalpy in solution: -1535.788654 a.u.  
 M06 free energy in solution: -1535.885680 a.u.

### Cartesian coordinates

| ATOM | X         | Y         | Z         |
|------|-----------|-----------|-----------|
| Ru   | -0.495200 | 0.846753  | 0.283596  |
| O    | -1.426959 | 2.481998  | -1.551765 |
| O    | -1.580199 | 2.710965  | 0.612706  |
| N    | -0.655476 | -2.002349 | -0.187672 |
| N    | 1.496181  | -1.695198 | 0.032225  |
| C    | 0.288377  | -1.043509 | -0.007164 |
| C    | -0.154824 | -3.369193 | -0.049122 |
| H    | -0.579588 | -4.035692 | -0.804579 |
| H    | -0.397795 | -3.774483 | 0.943458  |
| C    | 1.348321  | -3.148083 | -0.227588 |
| H    | 1.957087  | -3.732289 | 0.466963  |
| H    | 1.680833  | -3.376382 | -1.249132 |
| C    | -2.063670 | -1.618345 | -0.128200 |
| C    | -2.612979 | -1.707113 | 1.320819  |
| H    | -1.971849 | -1.119741 | 1.990003  |
| H    | -2.577834 | -2.750565 | 1.666279  |
| C    | -4.060522 | -1.180092 | 1.366406  |
| H    | -4.437243 | -1.247745 | 2.395471  |
| C    | -4.941078 | -2.036341 | 0.433358  |
| H    | -4.953661 | -3.080963 | 0.776108  |
| H    | -5.978992 | -1.678710 | 0.461061  |
| C    | -4.396327 | -1.954385 | -1.007736 |
| H    | -5.020420 | -2.563812 | -1.674561 |
| C    | -2.949764 | -2.496841 | -1.043270 |
| H    | -2.554221 | -2.475667 | -2.067462 |
| H    | -2.938700 | -3.544032 | -0.706246 |
| C    | -4.414151 | -0.484579 | -1.473851 |
| H    | -4.057804 | -0.405747 | -2.509449 |
| H    | -5.444297 | -0.102030 | -1.460012 |
| C    | -3.524155 | 0.381767  | -0.540547 |
| H    | -3.559888 | 1.413818  | -0.893070 |

|   |           |           |           |
|---|-----------|-----------|-----------|
| C | -2.091408 | -0.168437 | -0.641671 |
| H | -1.763912 | -0.154098 | -1.690110 |
| C | -4.072462 | 0.289514  | 0.898451  |
| H | -3.471586 | 0.914763  | 1.569700  |
| H | -5.097202 | 0.683967  | 0.929254  |
| C | 2.811725  | -1.164052 | -0.184796 |
| C | 3.769665  | -1.282908 | 0.838639  |
| C | 5.075295  | -0.843163 | 0.586600  |
| H | 5.815772  | -0.922556 | 1.379863  |
| C | 5.451838  | -0.311347 | -0.648505 |
| C | 4.483873  | -0.239181 | -1.657374 |
| H | 4.761932  | 0.152604  | -2.633677 |
| C | 3.168297  | -0.665001 | -1.456530 |
| C | 3.428011  | -1.889504 | 2.180408  |
| H | 4.128961  | -1.551478 | 2.949826  |
| H | 3.487913  | -2.986312 | 2.151169  |
| H | 2.414231  | -1.629698 | 2.497413  |
| C | 6.858461  | 0.184391  | -0.890108 |
| H | 6.915044  | 1.276740  | -0.794661 |
| H | 7.204929  | -0.068973 | -1.898263 |
| H | 7.563909  | -0.244106 | -0.170946 |
| C | 2.164814  | -0.576443 | -2.583119 |
| H | 1.630402  | -1.521723 | -2.732807 |
| H | 2.663915  | -0.321500 | -3.522592 |
| H | 1.403645  | 0.186959  | -2.385616 |
| C | 0.171759  | 0.918857  | 2.169811  |
| C | 1.263931  | 1.882272  | 0.000340  |
| C | 1.137120  | 2.016927  | 1.558170  |
| H | 0.709868  | 0.080407  | 2.619854  |
| H | -0.544463 | 1.361451  | 2.869322  |
| H | 2.091068  | 1.229944  | -0.271649 |
| C | 1.335965  | 3.188526  | -0.762970 |
| H | 2.334934  | 3.632574  | -0.623923 |
| H | 1.193865  | 3.032983  | -1.836377 |
| H | 0.599994  | 3.921076  | -0.423817 |
| N | -1.841770 | 3.169281  | -0.578136 |
| O | -2.462296 | 4.216734  | -0.706396 |
| C | 2.528479  | 1.944922  | 2.215635  |
| H | 3.017442  | 0.987856  | 2.017921  |
| H | 3.175504  | 2.741220  | 1.829106  |
| H | 2.438378  | 2.072448  | 3.300665  |
| H | 0.684147  | 2.990715  | 1.759477  |

### 35

B3LYP SCF energy: -1536.03334049 a.u.  
 B3LYP enthalpy: -1535.369113 a.u.  
 B3LYP free energy: -1535.467126 a.u.  
 M06 SCF energy in solution: -1536.44702106 a.u.  
 M06 enthalpy in solution: -1535.782794 a.u.  
 M06 free energy in solution: -1535.880807 a.u.

### Cartesian coordinates

| ATOM | X         | Y         | Z         |
|------|-----------|-----------|-----------|
| Ru   | 0.363797  | 0.858989  | -0.058322 |
| O    | -0.723012 | 1.619373  | -1.912742 |
| O    | 0.951778  | 2.742980  | -1.104987 |
| N    | 0.810631  | -1.942361 | 0.664726  |
| N    | -1.361173 | -1.727873 | 0.424405  |
| C    | -0.182541 | -1.040287 | 0.408907  |
| C    | 0.350251  | -3.331899 | 0.607397  |
| H    | 0.791505  | -3.934822 | 1.405913  |
| H    | 0.610390  | -3.794044 | -0.355677 |
| C    | -1.165811 | -3.155111 | 0.765565  |
| H    | -1.749568 | -3.789864 | 0.093330  |
| H    | -1.494058 | -3.348598 | 1.793975  |
| C    | 2.145240  | -1.503793 | 0.251286  |
| C    | 2.318281  | -1.686938 | -1.282687 |
| H    | 1.486392  | -1.192605 | -1.804147 |
| H    | 2.270417  | -2.754315 | -1.541020 |
| C    | 3.657754  | -1.090449 | -1.744845 |
| H    | 3.767552  | -1.232971 | -2.827899 |

|   |           |           |           |
|---|-----------|-----------|-----------|
| C | 4.809112  | -1.803035 | -1.006326 |
| H | 4.817008  | -2.872157 | -1.262033 |
| H | 5.775369  | -1.390551 | -1.326343 |
| C | 4.637408  | -1.618074 | 0.516131  |
| H | 5.458611  | -2.120503 | 1.043804  |
| C | 3.294267  | -2.245133 | 0.965352  |
| H | 3.169936  | -2.157740 | 2.052526  |
| H | 3.286382  | -3.317590 | 0.718559  |
| C | 4.660935  | -0.107368 | 0.837719  |
| H | 4.587551  | 0.053864  | 1.921435  |
| H | 5.619960  | 0.321599  | 0.513569  |
| C | 3.487856  | 0.608847  | 0.113068  |
| H | 3.523328  | 1.677957  | 0.336416  |
| C | 2.182455  | -0.017284 | 0.658041  |
| H | 2.223586  | 0.002383  | 1.750482  |
| C | 3.657999  | 0.411703  | -1.408903 |
| H | 2.856560  | 0.927445  | -1.953911 |
| H | 4.600779  | 0.872509  | -1.734234 |
| C | -2.674491 | -1.281662 | 0.053681  |
| C | -2.984780 | -1.103301 | -1.309186 |
| C | -4.283612 | -0.707151 | -1.646493 |
| H | -4.525724 | -0.560708 | -2.696965 |
| C | -5.275352 | -0.506866 | -0.682902 |
| C | -4.947433 | -0.740838 | 0.655767  |
| H | -5.710012 | -0.612080 | 1.421432  |
| C | -3.664136 | -1.134169 | 1.045830  |
| C | -1.975186 | -1.346654 | -2.406358 |
| H | -2.486103 | -1.559054 | -3.350861 |
| H | -1.320015 | -2.193984 | -2.177917 |
| H | -1.341023 | -0.468159 | -2.565125 |
| C | -6.658007 | -0.041051 | -1.075471 |
| H | -6.720489 | 1.055267  | -1.071914 |
| H | -7.419777 | -0.412364 | -0.381494 |
| H | -6.922819 | -0.377081 | -2.083631 |
| C | -3.382989 | -1.402247 | 2.507402  |
| H | -3.556343 | -2.456984 | 2.761779  |
| H | -4.045261 | -0.807145 | 3.143971  |
| H | -2.349852 | -1.166309 | 2.779392  |
| C | -1.372864 | 1.434974  | 0.995198  |
| C | 0.654543  | 1.842390  | 1.880945  |
| C | -0.701313 | 2.531050  | 1.787666  |
| H | -1.778181 | 0.658252  | 1.640142  |
| H | 0.631754  | 1.065878  | 2.653896  |
| C | 1.846356  | 2.766545  | 2.053592  |
| H | 2.779327  | 2.233523  | 2.255817  |
| H | 1.991871  | 3.410590  | 1.179203  |
| H | 1.664723  | 3.427047  | 2.916521  |
| H | -2.084941 | 1.709165  | 0.211438  |
| N | 0.067901  | 2.634223  | -2.037433 |
| O | -0.014643 | 3.418128  | -2.958462 |
| C | -1.360454 | 2.911532  | 3.123798  |
| H | -0.758397 | 3.646663  | 3.672097  |
| H | -2.354587 | 3.346841  | 2.962527  |
| H | -1.478805 | 2.028051  | 3.764280  |
| H | -0.599546 | 3.432915  | 1.169413  |

### 35'

B3LYP SCF energy: -1536.03343169 a.u.  
 B3LYP enthalpy: -1535.369701 a.u.  
 B3LYP free energy: -1535.467990 a.u.  
 M06 SCF energy in solution: -1536.45179671 a.u.  
 M06 enthalpy in solution: -1535.788066 a.u.  
 M06 free energy in solution: -1535.886355 a.u.

### Cartesian coordinates

| ATOM | X         | Y         | Z         |
|------|-----------|-----------|-----------|
| Ru   | 0.407143  | 0.932897  | 0.173487  |
| O    | 1.856719  | 2.082517  | -1.748053 |
| O    | 1.414396  | 2.889499  | 0.232232  |
| N    | 0.672980  | -1.964602 | 0.173489  |
| N    | -1.480486 | -1.671701 | -0.013917 |

|   |           |           |           |
|---|-----------|-----------|-----------|
| C | -0.290731 | -1.005249 | 0.087005  |
| C | 0.185751  | -3.327267 | -0.051625 |
| H | 0.597301  | -4.027557 | 0.680544  |
| H | 0.462369  | -3.679030 | -1.054766 |
| C | -1.325991 | -3.138353 | 0.095451  |
| H | -1.903286 | -3.644317 | -0.683689 |
| H | -1.693019 | -3.484320 | 1.070294  |
| C | 2.084518  | -1.598486 | 0.104640  |
| C | 2.651361  | -1.797104 | -1.327043 |
| H | 2.043734  | -1.222205 | -2.036654 |
| H | 2.580319  | -2.857191 | -1.608732 |
| C | 4.121474  | -1.332727 | -1.383582 |
| H | 4.508552  | -1.499006 | -2.397285 |
| C | 4.959897  | -2.135481 | -0.369031 |
| H | 4.942329  | -3.206806 | -0.616017 |
| H | 6.009131  | -1.814566 | -0.414108 |
| C | 4.399246  | -1.909700 | 1.050204  |
| H | 4.998281  | -2.470329 | 1.779911  |
| C | 2.942472  | -2.419068 | 1.101689  |
| H | 2.525374  | -2.312743 | 2.112036  |
| H | 2.915814  | -3.488706 | 0.847088  |
| C | 4.442674  | -0.404537 | 1.390466  |
| H | 4.071283  | -0.235369 | 2.410666  |
| H | 5.480453  | -0.045125 | 1.364900  |
| C | 3.589924  | 0.397946  | 0.365018  |
| H | 3.624122  | 1.460900  | 0.622872  |
| C | 2.152504  | -0.122659 | 0.492238  |
| H | 1.835314  | -0.015446 | 1.560025  |
| C | 4.180780  | 0.166716  | -1.042034 |
| H | 3.629977  | 0.754012  | -1.779877 |
| H | 5.223352  | 0.513025  | -1.057543 |
| C | -2.818578 | -1.173741 | -0.137912 |
| C | -3.337847 | -0.949534 | -1.430951 |
| C | -4.672424 | -0.556870 | -1.553968 |
| H | -5.074324 | -0.371049 | -2.547794 |
| C | -5.509129 | -0.414511 | -0.439608 |
| C | -4.977914 | -0.691180 | 0.821483  |
| H | -5.616340 | -0.603528 | 1.698431  |
| C | -3.643019 | -1.079624 | 0.997840  |
| C | -2.494881 | -1.180153 | -2.664786 |
| H | -3.025977 | -0.850410 | -3.562583 |
| H | -2.264738 | -2.246478 | -2.792151 |
| H | -1.538330 | -0.651421 | -2.619872 |
| C | -6.941265 | 0.038891  | -0.601444 |
| H | -7.000182 | 1.130039  | -0.708212 |
| H | -7.550204 | -0.238484 | 0.265034  |
| H | -7.401455 | -0.397810 | -1.494707 |
| C | -3.147584 | -1.420822 | 2.385465  |
| H | -3.404062 | -2.455761 | 2.650517  |
| H | -3.615024 | -0.774683 | 3.135772  |
| H | -2.063874 | -1.314926 | 2.474793  |
| C | -0.902202 | 1.542659  | 1.579677  |
| C | -1.456787 | 2.409521  | 0.359715  |
| C | -1.005427 | 1.808124  | -1.006078 |
| H | -1.652643 | 0.819572  | 1.905637  |
| H | -1.758226 | 1.181116  | -1.479243 |
| H | -0.591983 | 2.544072  | -1.694429 |
| C | -0.371826 | 2.363491  | 2.743743  |
| H | -1.170383 | 2.983965  | 3.180659  |
| H | 0.001675  | 1.710470  | 3.542395  |
| H | 0.438597  | 3.030096  | 2.433859  |
| O | 2.644653  | 4.039449  | -1.162981 |
| N | 1.997514  | 3.028013  | -0.924763 |
| H | -0.992812 | 3.394433  | 0.451673  |
| C | -2.986798 | 2.549599  | 0.449554  |
| H | -3.489930 | 1.588413  | 0.330132  |
| H | -3.273441 | 2.970613  | 1.421114  |
| H | -3.347439 | 3.226106  | -0.334089 |

### 39

B3LYP SCF energy: -2175.59729155 a.u.

B3LYP enthalpy: -2174.962966 a.u.  
 B3LYP free energy: -2175.072060 a.u.  
 M06 SCF energy in solution: -2176.04627634 a.u.  
 M06 enthalpy in solution: -2175.411951 a.u.  
 M06 free energy in solution: -2175.521045 a.u.

H 2.943862 3.735304 0.121282  
 C -2.510030 2.561020 -1.084945  
 H -3.282565 1.822419 -0.844078  
 H -2.972281 3.556860 -0.992860  
 H -2.192191 2.404173 -2.116079

Cartesian coordinates

| ATOM | X         | Y         | Z         |
|------|-----------|-----------|-----------|
| N    | 1.102364  | -1.815533 | 0.179168  |
| C    | 0.768609  | -3.247730 | 0.343988  |
| H    | 1.106723  | -3.814027 | -0.530290 |
| C    | -0.761953 | -3.227464 | 0.483953  |
| N    | -1.094943 | -1.804999 | 0.250029  |
| H    | -1.099023 | -3.531908 | 1.480396  |
| C    | 2.481965  | -1.408321 | 0.067962  |
| C    | -2.476424 | -1.392213 | 0.194759  |
| C    | -5.192330 | -0.693315 | 0.087755  |
| C    | -3.151188 | -1.063783 | 1.388688  |
| C    | -3.156209 | -1.453069 | -1.038802 |
| C    | -4.506993 | -1.088089 | -1.064628 |
| C    | -4.500769 | -0.704861 | 1.302710  |
| C    | -2.476293 | -1.119062 | 2.737786  |
| C    | -2.481379 | -1.914745 | -2.307456 |
| H    | -5.037215 | -1.124721 | -2.013738 |
| H    | -5.027132 | -0.441246 | 2.217532  |
| C    | -6.641610 | -0.270474 | 0.023890  |
| C    | 5.193788  | -0.714913 | -0.131662 |
| C    | 3.098758  | -1.397246 | -1.199499 |
| C    | 3.217952  | -1.156610 | 1.244407  |
| C    | 4.564268  | -0.799971 | 1.114242  |
| C    | 4.448676  | -1.033980 | -1.269866 |
| C    | 2.363355  | -1.787854 | -2.458543 |
| C    | 2.606273  | -1.294681 | 2.617358  |
| H    | 5.137133  | -0.595041 | 2.016051  |
| H    | 4.930562  | -1.014138 | -2.244851 |
| C    | 6.640731  | -0.293761 | -0.241887 |
| H    | -2.078432 | -2.119697 | 2.950760  |
| H    | -1.643138 | -0.412190 | 2.805518  |
| H    | -2.004855 | -2.895211 | -2.183371 |
| H    | -1.707020 | -1.209402 | -2.626348 |
| H    | -7.156546 | -0.730593 | -0.826003 |
| H    | -6.730826 | 0.817935  | -0.091560 |
| H    | -7.180301 | -0.543726 | 0.937713  |
| H    | 2.266251  | -2.321747 | 2.805878  |
| H    | 1.747422  | -0.628838 | 2.744826  |
| H    | 3.055476  | -1.822125 | -3.305387 |
| H    | 1.565910  | -1.076719 | -2.697936 |
| H    | 7.106831  | -0.693100 | -1.148739 |
| H    | 7.224611  | -0.634230 | 0.620188  |
| H    | 6.731611  | 0.799823  | -0.283046 |
| C    | 0.004246  | -1.037099 | 0.111153  |
| Ru   | -0.000563 | 1.004845  | -0.124222 |
| Cl   | 0.146294  | 1.274552  | 2.323083  |
| Cl   | -0.127209 | 0.762497  | -2.574398 |
| C    | -1.368999 | 2.442913  | -0.101742 |
| H    | 3.343984  | -1.050882 | 3.387802  |
| H    | 1.904090  | -2.780420 | -2.370224 |
| H    | -3.214261 | -2.006299 | -3.114826 |
| H    | -3.192818 | -0.879025 | 3.529221  |
| H    | -1.265505 | -3.858808 | -0.253975 |
| H    | 1.270635  | -3.652258 | 1.227413  |
| C    | -0.036085 | 3.285229  | -0.430888 |
| C    | 1.328108  | 2.457775  | -0.493869 |
| H    | -0.190428 | 3.614596  | -1.461750 |
| H    | 1.656593  | 2.381021  | -1.531471 |
| C    | 0.037016  | 4.459516  | 0.557363  |
| H    | 0.895115  | 5.102437  | 0.335099  |
| H    | -0.871626 | 5.065922  | 0.477208  |
| H    | 0.122149  | 4.101336  | 1.586184  |
| H    | -1.681738 | 2.635812  | 0.927367  |
| C    | 2.468334  | 2.794481  | 0.439483  |
| H    | 2.165328  | 2.878250  | 1.482572  |
| H    | 3.231100  | 2.011022  | 0.367013  |

43

B3LYP SCF energy: -1483.00601958 a.u.  
 B3LYP enthalpy: -1482.333900 a.u.  
 B3LYP free energy: -1482.443620 a.u.  
 M06 SCF energy in solution: -1483.39668026 a.u.  
 M06 enthalpy in solution: -1482.724561 a.u.  
 M06 free energy in solution: -1482.834281 a.u.

Cartesian coordinates

| ATOM | X         | Y         | Z         |
|------|-----------|-----------|-----------|
| O    | 3.365962  | 2.361564  | -0.430098 |
| O    | 1.137929  | 2.736487  | -0.475820 |
| C    | 0.713210  | 0.612029  | 1.911919  |
| C    | 2.380601  | 3.072249  | -0.654429 |
| H    | 0.410234  | -0.336115 | 2.366277  |
| C    | -1.315128 | 1.677604  | 0.569846  |
| C    | -0.493012 | 1.650860  | 1.954783  |
| H    | -2.175228 | 1.019104  | 0.659701  |
| H    | -1.206548 | 1.188081  | 2.647813  |
| C    | 2.557065  | 4.505196  | -1.166901 |
| H    | 3.609501  | 4.712958  | -1.373077 |
| H    | 2.189197  | 5.216215  | -0.417261 |
| H    | 1.962570  | 4.661082  | -2.074015 |
| Ru   | 0.370613  | 0.761678  | -0.071316 |
| C    | -0.390725 | -1.136401 | -0.103457 |
| C    | 1.335925  | -0.009644 | -1.757747 |
| N    | 0.514605  | -2.169668 | -0.136203 |
| N    | -1.617216 | -1.698436 | -0.293297 |
| C    | 2.346767  | -0.843729 | -1.050022 |
| H    | 0.662101  | -0.596470 | -2.392137 |
| H    | 1.784241  | 0.808518  | -2.324762 |
| C    | -0.075551 | -3.424873 | -0.637089 |
| C    | 1.919960  | -1.924038 | -0.239765 |
| C    | -1.566846 | -3.170701 | -0.416729 |
| C    | -2.906824 | -1.069564 | -0.282885 |
| C    | 3.715621  | -0.555351 | -1.109629 |
| H    | 0.288732  | -4.295924 | -0.090301 |
| H    | 0.173085  | -3.554867 | -1.699574 |
| C    | 2.839340  | -2.707608 | 0.474577  |
| H    | -2.192038 | -3.507361 | -1.248562 |
| H    | -1.934391 | -3.643939 | 0.502573  |
| C    | -3.392266 | -0.476541 | -1.464333 |
| C    | -3.695969 | -1.120238 | 0.881394  |
| C    | 4.658500  | -1.338062 | -0.437373 |
| H    | 4.035768  | 0.316378  | -1.668639 |
| C    | 4.201650  | -2.404969 | 0.341556  |
| C    | 2.409091  | -3.817778 | 1.406063  |
| C    | -4.674718 | 0.078322  | -1.450271 |
| C    | -2.548317 | -0.410197 | -2.714339 |
| C    | -4.974404 | -0.551666 | 0.844369  |
| C    | -3.189476 | -1.745181 | 2.161522  |
| C    | 6.130888  | -1.014446 | -0.538780 |
| H    | 4.922066  | -3.004277 | 0.895152  |
| H    | 1.475707  | -3.568319 | 1.922590  |
| H    | 3.176212  | -3.997503 | 2.165795  |
| H    | 2.252806  | -4.770251 | 0.880557  |
| C    | -5.484097 | 0.049673  | -0.309027 |
| H    | -5.050970 | 0.546763  | -2.357400 |
| H    | -1.688757 | 0.255537  | -2.574728 |
| H    | -3.134828 | -0.034459 | -3.558038 |
| H    | -2.148744 | -1.393008 | -2.991150 |
| H    | -5.582550 | -0.574063 | 1.746347  |
| H    | -2.121008 | -1.559667 | 2.309802  |
| H    | -3.336121 | -2.833801 | 2.169854  |
| H    | -3.727929 | -1.344122 | 3.025662  |



|   |           |           |           |
|---|-----------|-----------|-----------|
| H | 6.521299  | -1.237474 | -1.540445 |
| H | 6.719855  | -1.591487 | 0.181809  |
| H | 6.309879  | 0.050380  | -0.352099 |
| C | -6.876919 | 0.635147  | -0.333224 |
| H | -7.239297 | 0.848647  | 0.677488  |
| H | -7.590613 | -0.058027 | -0.798211 |
| H | -6.909897 | 1.566628  | -0.908937 |
| C | -1.742438 | 3.022345  | 0.010961  |
| H | -2.296616 | 2.862542  | -0.922313 |
| H | -2.429727 | 3.534049  | 0.702792  |
| H | -0.893316 | 3.671797  | -0.199670 |
| C | -0.094082 | 3.038985  | 2.462051  |
| H | 0.394278  | 2.966366  | 3.439768  |
| H | 0.589656  | 3.528778  | 1.765877  |
| H | -0.978584 | 3.674231  | 2.578047  |
| C | 2.081472  | 1.030002  | 2.413875  |
| H | 2.054803  | 1.248095  | 3.493506  |
| H | 2.783497  | 0.201607  | 2.266700  |
| H | 2.485955  | 1.893314  | 1.883486  |

44

B3LYP SCF energy: -1483.01097092 a.u.  
 B3LYP enthalpy: -1482.338670 a.u.  
 B3LYP free energy: -1482.447516 a.u.  
 M06 SCF energy in solution: -1483.40010746 a.u.  
 M06 enthalpy in solution: -1482.727807 a.u.  
 M06 free energy in solution: -1482.836653 a.u.

Cartesian coordinates

| ATOM | X         | Y         | Z         |
|------|-----------|-----------|-----------|
| O    | -0.343761 | 2.584655  | -1.722469 |
| O    | 1.076465  | 2.895899  | -0.032886 |
| C    | 1.024597  | 0.497412  | 1.988919  |
| C    | 0.445751  | 3.309700  | -1.072969 |
| H    | 0.986337  | -0.529734 | 2.365125  |
| C    | -1.316612 | 1.333275  | 1.075132  |
| C    | -0.349427 | 1.252424  | 2.335603  |
| H    | -2.035547 | 0.518629  | 1.111348  |
| H    | -0.862780 | 0.557794  | 3.012411  |
| C    | 0.675962  | 4.757587  | -1.484438 |
| H    | 0.249741  | 4.952116  | -2.471058 |
| H    | 1.746235  | 4.988071  | -1.485101 |
| H    | 0.201504  | 5.424905  | -0.754407 |
| Ru   | 0.404345  | 0.799050  | 0.102812  |
| C    | -0.086584 | -1.158157 | -0.117243 |
| C    | 1.413438  | 0.336078  | -1.683550 |
| N    | 0.944065  | -2.061159 | -0.270012 |
| N    | -1.235571 | -1.842667 | -0.362423 |
| C    | 2.542679  | -0.407993 | -1.073035 |
| H    | 0.791445  | -0.268488 | -2.349643 |
| H    | 1.722874  | 1.249214  | -2.190581 |
| C    | 0.503706  | -3.318339 | -0.903446 |
| C    | 2.298073  | -1.618052 | -0.376934 |
| C    | -1.007641 | -3.270794 | -0.667969 |
| C    | -2.588825 | -1.362897 | -0.321194 |
| C    | 3.855418  | 0.083406  | -1.110940 |
| H    | 0.972471  | -4.192692 | -0.448137 |
| H    | 0.759780  | -3.306783 | -1.971910 |
| C    | 3.341187  | -2.329684 | 0.233611  |
| H    | -1.590768 | -3.571224 | -1.543153 |
| H    | -1.312047 | -3.897679 | 0.179011  |
| C    | -3.104579 | -0.645547 | -1.418312 |
| C    | -3.399832 | -1.686194 | 0.783883  |
| C    | 4.921699  | -0.618609 | -0.540021 |
| H    | 4.039377  | 1.028089  | -1.617112 |
| C    | 4.642743  | -1.819048 | 0.120436  |
| C    | 3.097790  | -3.583754 | 1.040926  |
| C    | -4.444929 | -0.248077 | -1.373962 |
| C    | -2.251543 | -0.282461 | -2.609440 |
| C    | -4.733778 | -1.265463 | 0.778004  |
| C    | -2.860532 | -2.447661 | 1.973806  |

|   |           |           |           |
|---|-----------|-----------|-----------|
| C | 6.336061  | -0.096058 | -0.643713 |
| H | 5.456657  | -2.364444 | 0.594184  |
| H | 2.164215  | -3.515152 | 1.609963  |
| H | 3.915149  | -3.748626 | 1.749769  |
| H | 3.035412  | -4.481078 | 0.409943  |
| C | -5.275532 | -0.542747 | -0.288325 |
| H | -4.849430 | 0.308129  | -2.217083 |
| H | -1.596484 | 0.567367  | -2.381618 |
| H | -2.881767 | -0.001838 | -3.459179 |
| H | -1.612483 | -1.115986 | -2.922309 |
| H | -5.361345 | -1.502863 | 1.634726  |
| H | -1.822894 | -2.175670 | 2.192269  |
| H | -2.887372 | -3.533940 | 1.812411  |
| H | -3.460536 | -2.242987 | 2.865876  |
| H | 6.768087  | -0.309644 | -1.630575 |
| H | 6.989045  | -0.555020 | 0.105932  |
| H | 6.371456  | 0.990160  | -0.504502 |
| C | -6.710099 | -0.068772 | -0.259959 |
| H | -6.773813 | 0.978850  | 0.062680  |
| H | -7.315560 | -0.662104 | 0.433075  |
| H | -7.171935 | -0.128850 | -1.251722 |
| C | -2.041571 | 2.636075  | 0.807638  |
| H | -2.535200 | 2.590803  | -0.167019 |
| H | -2.821031 | 2.798130  | 1.569554  |
| H | -1.381541 | 3.504355  | 0.812308  |
| C | -0.139386 | 2.598678  | 3.037048  |
| H | 0.464538  | 2.469269  | 3.941533  |
| H | 0.369909  | 3.311122  | 2.383535  |
| H | -1.099595 | 3.031979  | 3.337527  |
| C | 2.331684  | 1.164844  | 2.383235  |
| H | 2.442327  | 1.229655  | 3.477021  |
| H | 3.168966  | 0.564540  | 2.008173  |
| H | 2.424853  | 2.170742  | 1.966144  |

49

B3LYP SCF energy: -1575.34547253 a.u.  
 B3LYP enthalpy: -1574.651561 a.u.  
 B3LYP free energy: -1574.752804 a.u.  
 M06 SCF energy in solution: -1575.74732225 a.u.  
 M06 enthalpy in solution: -1575.053411 a.u.  
 M06 free energy in solution: -1575.154654 a.u.

Cartesian coordinates

| ATOM | X         | Y         | Z         |
|------|-----------|-----------|-----------|
| Ru   | -0.424055 | 0.769475  | 0.071953  |
| O    | -1.471569 | 2.672835  | 0.285245  |
| O    | -1.590038 | 2.390106  | -1.881212 |
| N    | -0.621910 | -2.111373 | -0.204175 |
| N    | 1.526994  | -1.798137 | 0.041083  |
| C    | 0.324935  | -1.148613 | -0.069790 |
| C    | -0.127999 | -3.470924 | 0.021278  |
| H    | -0.521033 | -4.171546 | -0.720721 |
| H    | -0.417932 | -3.830422 | 1.018392  |
| C    | 1.386302  | -3.266266 | -0.095983 |
| H    | 1.954620  | -3.781495 | 0.683974  |
| H    | 1.774256  | -3.592964 | -1.069166 |
| C    | -2.028888 | -1.719085 | -0.125008 |
| C    | -2.528529 | -1.749754 | 1.344763  |
| H    | -1.864346 | -1.132280 | 1.963462  |
| H    | -2.479096 | -2.776589 | 1.735138  |
| C    | -3.974566 | -1.224046 | 1.421140  |
| H    | -4.315610 | -1.254540 | 2.464500  |
| C    | -4.883032 | -2.117704 | 0.551706  |
| H    | -4.880338 | -3.148375 | 0.934852  |
| H    | -5.920568 | -1.761391 | 0.601480  |
| C    | -4.388402 | -2.090120 | -0.909747 |
| H    | -5.034069 | -2.725332 | -1.530394 |
| C    | -2.942289 | -2.632004 | -0.975250 |
| H    | -2.582467 | -2.647176 | -2.012638 |
| H    | -2.917193 | -3.666735 | -0.601838 |
| C    | -4.426610 | -0.638514 | -1.428989 |

|   |           |           |           |
|---|-----------|-----------|-----------|
| H | -4.105397 | -0.597545 | -2.478174 |
| H | -5.457471 | -0.258777 | -1.395513 |
| C | -3.508075 | 0.262595  | -0.560089 |
| H | -3.554293 | 1.280096  | -0.949961 |
| C | -2.075648 | -0.285397 | -0.681926 |
| H | -1.784860 | -0.306947 | -1.743262 |
| C | -4.006843 | 0.226256  | 0.898677  |
| H | -3.382642 | 0.876142  | 1.524009  |
| H | -5.030691 | 0.620877  | 0.951595  |
| C | 2.854866  | -1.268498 | -0.097559 |
| C | 3.682599  | -1.160738 | 1.032821  |
| C | 4.998124  | -0.705319 | 0.857168  |
| H | 5.638631  | -0.612296 | 1.732207  |
| C | 5.508430  | -0.378958 | -0.398222 |
| C | 4.669756  | -0.532982 | -1.511286 |
| H | 5.053759  | -0.300192 | -2.502347 |
| C | 3.354032  | -0.980293 | -1.389817 |
| C | 3.219693  | -1.537169 | 2.422597  |
| H | 3.845971  | -2.337635 | 2.835752  |
| H | 2.182166  | -1.875865 | 2.431453  |
| H | 3.298438  | -0.685175 | 3.108517  |
| C | 6.920695  | 0.132038  | -0.562901 |
| H | 6.930103  | 1.211348  | -0.763006 |
| H | 7.426970  | -0.355062 | -1.404169 |
| H | 7.517380  | -0.041196 | 0.338182  |
| C | 2.491137  | -1.134273 | -2.622041 |
| H | 3.054543  | -0.866440 | -3.520520 |
| H | 1.602098  | -0.495605 | -2.577986 |
| H | 2.136875  | -2.164287 | -2.750103 |
| C | 0.375809  | 0.984814  | 1.894628  |
| H | 0.885642  | 0.110824  | 2.305882  |
| C | 1.293326  | 1.690752  | -0.517332 |
| H | 2.044043  | 0.992647  | -0.874961 |
| C | 1.433097  | 1.872861  | 1.055815  |
| H | 2.389916  | 1.389801  | 1.279131  |
| C | 1.465789  | 3.339989  | 1.499175  |
| H | 1.672416  | 3.410458  | 2.572115  |
| H | 2.259091  | 3.881692  | 0.973205  |
| H | 0.516687  | 3.842241  | 1.299526  |
| C | 1.292594  | 2.927634  | -1.393012 |
| H | 2.313970  | 3.337013  | -1.445845 |
| H | 0.990498  | 2.666624  | -2.411403 |
| H | 0.633748  | 3.721750  | -1.041730 |
| O | -2.465461 | 4.169248  | -0.955476 |
| N | -1.861580 | 3.103466  | -0.886144 |
| C | -0.439424 | 1.678324  | 2.976044  |
| H | -1.126439 | 0.956402  | 3.434715  |
| H | 0.207569  | 2.055360  | 3.782729  |
| H | -1.029791 | 2.512850  | 2.592006  |

## 50

B3LYP SCF energy: -1575.34328511 a.u.  
 B3LYP enthalpy: -1574.649435 a.u.  
 B3LYP free energy: -1574.749969 a.u.  
 M06 SCF energy in solution: -1575.74246821 a.u.  
 M06 enthalpy in solution: -1575.048618 a.u.  
 M06 free energy in solution: -1575.149152 a.u.

## Cartesian coordinates

| ATOM | X         | Y         | Z         |
|------|-----------|-----------|-----------|
| Ru   | 0.361041  | 0.824832  | 0.244176  |
| O    | 1.305411  | 2.804172  | 0.444289  |
| O    | 1.831111  | 2.099713  | -1.550797 |
| N    | 0.719018  | -2.063962 | 0.113555  |
| N    | -1.444054 | -1.822863 | -0.056983 |
| C    | -0.267925 | -1.130026 | 0.065700  |
| C    | 0.265899  | -3.430885 | -0.156850 |
| H    | 0.693902  | -4.143775 | 0.553399  |
| H    | 0.553300  | -3.743819 | -1.169737 |
| C    | -1.252065 | -3.287377 | -0.008560 |
| H    | -1.812526 | -3.776707 | -0.810499 |

|   |           |           |           |
|---|-----------|-----------|-----------|
| H | -1.614388 | -3.683665 | 0.949049  |
| C | 2.120426  | -1.654135 | 0.052251  |
| C | 2.677874  | -1.785304 | -1.389794 |
| H | 2.052441  | -1.195857 | -2.071636 |
| H | 2.626874  | -2.834704 | -1.713222 |
| C | 4.137262  | -1.288980 | -1.440850 |
| H | 4.518641  | -1.406654 | -2.463646 |
| C | 5.001678  | -2.112725 | -0.465901 |
| H | 5.003312  | -3.174042 | -0.753725 |
| H | 6.043731  | -1.768800 | -0.508115 |
| C | 4.450046  | -1.952835 | 0.965488  |
| H | 5.067135  | -2.528923 | 1.667697  |
| C | 3.004563  | -2.494088 | 1.008859  |
| H | 2.595147  | -2.434959 | 2.026312  |
| H | 2.999236  | -3.554008 | 0.714606  |
| C | 4.466174  | -0.460877 | 1.363051  |
| H | 4.104695  | -0.338762 | 2.393494  |
| H | 5.496607  | -0.080166 | 1.339325  |
| C | 3.583961  | 0.360921  | 0.379763  |
| H | 3.604164  | 1.413816  | 0.677701  |
| C | 2.154607  | -0.190365 | 0.501665  |
| H | 1.864849  | -0.148279 | 1.579367  |
| C | 4.167838  | 0.196611  | -1.039744 |
| H | 3.600318  | 0.800907  | -1.750092 |
| H | 5.203069  | 0.564862  | -1.049154 |
| C | -2.792366 | -1.339502 | -0.133548 |
| C | -3.350710 | -1.095472 | -1.408514 |
| C | -4.675042 | -0.661747 | -1.486076 |
| H | -5.103174 | -0.457836 | -2.465286 |
| C | -5.468502 | -0.494235 | -0.343271 |
| C | -4.909149 | -0.808773 | 0.895571  |
| H | -5.519347 | -0.720136 | 1.792440  |
| C | -3.584073 | -1.248730 | 1.025710  |
| C | -2.557552 | -1.338470 | -2.673341 |
| H | -2.371889 | -2.410343 | -2.823901 |
| H | -1.580888 | -0.845814 | -2.655708 |
| H | -3.105934 | -0.976251 | -3.547875 |
| C | -6.887641 | 0.011733  | -0.455382 |
| H | -6.909608 | 1.102073  | -0.582175 |
| H | -7.470140 | -0.225695 | 0.440558  |
| H | -7.401032 | -0.423387 | -1.320106 |
| C | -3.084713 | -1.666051 | 2.391907  |
| H | -3.390383 | -0.947102 | 3.159691  |
| H | -1.997557 | -1.758077 | 2.429885  |
| H | -3.513563 | -2.636677 | 2.675458  |
| C | -1.154731 | 1.607615  | -0.885440 |
| H | -1.767959 | 0.828180  | -1.328166 |
| C | -0.921804 | 1.197775  | 1.734834  |
| H | -1.526856 | 0.366056  | 2.091850  |
| C | -1.711907 | 1.966295  | 0.560580  |
| H | -2.699879 | 1.494335  | 0.579700  |
| C | -1.845410 | 3.472659  | 0.810829  |
| H | -2.477965 | 3.933123  | 0.044529  |
| H | -2.315031 | 3.659332  | 1.782445  |
| H | -0.874234 | 3.972654  | 0.798149  |
| C | -0.400731 | 2.015746  | 2.907312  |
| H | -1.224879 | 2.468601  | 3.479361  |
| H | 0.140592  | 1.356916  | 3.598213  |
| H | 0.278556  | 2.814117  | 2.598854  |
| O | 2.572393  | 4.035307  | -0.846606 |
| N | 1.931973  | 3.004352  | -0.679421 |
| C | -0.983986 | 2.735793  | -1.883337 |
| H | -0.461089 | 2.373684  | -2.772964 |
| H | -1.974016 | 3.096133  | -2.205774 |
| H | -0.432043 | 3.593364  | -1.496692 |

## 54

B3LYP SCF energy: -2136.28292495 a.u.  
 B3LYP enthalpy: -2135.678284 a.u.  
 B3LYP free energy: -2135.783485 a.u.  
 M06 SCF energy in solution: -2136.75108305 a.u.

M06 enthalpy in solution: -2136.146442 a.u.  
M06 free energy in solution: -2136.251643 a.u.

Cartesian coordinates

| ATOM | X         | Y         | Z         |
|------|-----------|-----------|-----------|
| N    | 0.938782  | -1.788931 | 0.239317  |
| C    | 0.538734  | -3.201436 | 0.421638  |
| H    | 0.830893  | -3.789405 | -0.455380 |
| C    | -0.986208 | -3.101364 | 0.587307  |
| N    | -1.257206 | -1.679282 | 0.278571  |
| H    | -1.315727 | -3.330611 | 1.606543  |
| C    | 2.333076  | -1.434213 | 0.138175  |
| C    | -2.616800 | -1.200333 | 0.206631  |
| C    | -5.285291 | -0.349769 | 0.064292  |
| C    | -3.259519 | -0.754178 | 1.378388  |
| C    | -3.309460 | -1.306037 | -1.016808 |
| C    | -4.634765 | -0.862934 | -1.061944 |
| C    | -4.587135 | -0.323082 | 1.274298  |
| C    | -2.576482 | -0.758313 | 2.724474  |
| C    | -2.674320 | -1.905854 | -2.247828 |
| H    | -5.173720 | -0.929937 | -2.004498 |
| H    | -5.089535 | 0.032084  | 2.171397  |
| C    | -6.705097 | 0.158855  | -0.025964 |
| C    | 5.070008  | -0.841168 | -0.030257 |
| C    | 2.968739  | -1.469042 | -1.119780 |
| C    | 3.057511  | -1.179821 | 1.320990  |
| C    | 4.418204  | -0.876091 | 1.206394  |
| C    | 4.331537  | -1.155177 | -1.174803 |
| C    | 2.237767  | -1.854825 | -2.383194 |
| C    | 2.413937  | -1.246676 | 2.684631  |
| H    | 4.983391  | -0.670914 | 2.112897  |
| H    | 4.829307  | -1.171591 | -2.141871 |
| C    | 6.533054  | -0.475737 | -0.125914 |
| H    | -2.201618 | -1.756156 | 2.985974  |
| H    | -1.725361 | -0.070285 | 2.751708  |
| H    | -2.362672 | -2.944889 | -2.077185 |
| H    | -1.794121 | -1.336841 | -2.560983 |
| H    | -7.286354 | -0.402140 | -0.765832 |
| H    | -6.726644 | 1.214016  | -0.329446 |
| H    | -7.219773 | 0.086927  | 0.938012  |
| H    | 1.942229  | -2.220998 | 2.865388  |
| H    | 1.642139  | -0.478572 | 2.798977  |
| H    | 2.938729  | -1.918241 | -3.221018 |
| H    | 1.461329  | -1.127382 | -2.642922 |
| H    | 7.007086  | -0.942439 | -0.995831 |
| H    | 7.083263  | -0.784717 | 0.769322  |
| H    | 6.662870  | 0.609919  | -0.227919 |
| C    | -0.123932 | -0.968149 | 0.127144  |
| Ru   | -0.001319 | 1.051672  | -0.207089 |
| Cl   | 0.150909  | 1.499029  | 2.203353  |
| Cl   | -0.278351 | 0.705734  | -2.627471 |
| C    | -1.278987 | 2.544838  | -0.381560 |
| H    | 3.164696  | -1.096350 | 3.466275  |
| H    | 1.751402  | -2.833812 | -2.288536 |
| H    | -3.387256 | -1.912647 | -3.077710 |
| H    | -3.280780 | -0.459558 | 3.506822  |
| H    | -1.533348 | -3.748863 | -0.103205 |
| H    | 1.035896  | -3.625392 | 1.298444  |
| C    | 0.080954  | 3.309060  | -0.682048 |
| C    | 1.400187  | 2.381628  | -0.706526 |
| H    | -0.016687 | 3.601305  | -1.731019 |
| H    | 1.705225  | 2.221607  | -1.741726 |
| C    | 0.221105  | 4.508718  | 0.263367  |
| H    | 1.130211  | 5.078551  | 0.044973  |
| H    | -0.636880 | 5.177437  | 0.136300  |
| H    | 0.252010  | 4.181666  | 1.305851  |
| H    | -1.745816 | 2.855397  | 0.553414  |
| C    | 2.569035  | 2.717414  | 0.190797  |
| H    | 2.282853  | 2.891959  | 1.227402  |
| H    | 3.284130  | 1.887718  | 0.167852  |
| H    | 3.093091  | 3.604715  | -0.196858 |
| H    | -1.946073 | 2.493478  | -1.240311 |

58

B3LYP SCF energy: -1443.69596605 a.u.  
B3LYP enthalpy: -1443.053723 a.u.  
B3LYP free energy: -1443.161233 a.u.  
M06 SCF energy in solution: -1444.10703255 a.u.  
M06 enthalpy in solution: -1443.464790 a.u.  
M06 free energy in solution: -1443.572300 a.u.

Cartesian coordinates

| ATOM | X         | Y         | Z         |
|------|-----------|-----------|-----------|
| Ru   | 0.342297  | 0.807919  | -0.119605 |
| O    | 1.070168  | 2.799877  | -0.484544 |
| O    | 3.305931  | 2.467198  | -0.519799 |
| N    | 0.453916  | -2.121195 | -0.186508 |
| N    | -1.669662 | -1.613030 | -0.340936 |
| C    | -0.434926 | -1.073971 | -0.150861 |
| C    | -0.157801 | -3.364554 | -0.690439 |
| C    | -1.645691 | -3.085039 | -0.465847 |
| C    | 1.863588  | -1.890862 | -0.245535 |
| C    | 2.751693  | -2.688899 | 0.493822  |
| C    | 4.118257  | -2.386711 | 0.425542  |
| C    | 4.611176  | -1.303517 | -0.308850 |
| C    | 3.700075  | -0.505639 | -1.005034 |
| C    | 2.329172  | -0.797963 | -1.017985 |
| C    | 2.281272  | -3.810069 | 1.392107  |
| C    | 6.087974  | -0.985443 | -0.341140 |
| C    | 1.362924  | 0.048014  | -1.770126 |
| C    | -2.938833 | -0.946878 | -0.288914 |
| C    | -3.459789 | -0.376545 | -1.466036 |
| C    | -4.720020 | 0.224159  | -1.411626 |
| C    | -5.469406 | 0.269951  | -0.230409 |
| C    | -4.928245 | -0.316511 | 0.916471  |
| C    | -3.671075 | -0.932395 | 0.912121  |
| C    | -2.673093 | -0.382672 | -2.754696 |
| C    | -6.814618 | 0.957198  | -0.194334 |
| C    | -3.135402 | -1.555241 | 2.181526  |
| C    | -1.287953 | 1.831180  | 0.422232  |
| C    | 2.300370  | 3.166527  | -0.683795 |
| H    | 0.191709  | -4.244168 | -0.147858 |
| H    | 0.085222  | -3.495533 | -1.754103 |
| H    | -2.277756 | -3.411873 | -1.296438 |
| H    | -2.019122 | -3.552693 | 0.454323  |
| H    | 4.812576  | -2.997868 | 0.999240  |
| H    | 4.041196  | 0.380342  | -1.527844 |
| H    | 1.340185  | -3.554475 | 1.891719  |
| H    | 3.027096  | -4.017119 | 2.165772  |
| H    | 2.121034  | -4.749378 | 0.844647  |
| H    | 6.630396  | -1.513203 | 0.450422  |
| H    | 6.259292  | 0.089224  | -0.215927 |
| H    | 6.538206  | -1.276025 | -1.299710 |
| H    | 0.698116  | -0.528750 | -2.423090 |
| H    | 1.845880  | 0.858685  | -2.317891 |
| H    | -5.125963 | 0.670980  | -2.316821 |
| H    | -5.495730 | -0.293158 | 1.844584  |
| H    | -1.786288 | 0.257141  | -2.676580 |
| H    | -3.284418 | -0.013311 | -3.583439 |
| H    | -2.320364 | -1.387224 | -3.016444 |
| H    | -7.380058 | 0.779973  | -1.115901 |
| H    | -6.700154 | 2.044132  | -0.089357 |
| H    | -7.420787 | 0.609047  | 0.648256  |
| H    | -2.058642 | -1.394727 | 2.292498  |
| H    | -3.307427 | -2.639942 | 2.205824  |
| H    | -3.634633 | -1.132934 | 3.058977  |
| H    | -2.281300 | 1.395278  | 0.362860  |
| H    | -1.242423 | 2.857193  | 0.051531  |
| C    | 0.632594  | 0.722308  | 1.877788  |
| C    | -0.632659 | 1.689658  | 1.868310  |
| H    | 0.370763  | -0.233591 | 2.340916  |
| H    | -1.385349 | 1.160533  | 2.462928  |
| C    | 2.433824  | 4.621010  | -1.146642 |
| H    | 1.857166  | 4.779000  | -2.065176 |

|   |           |          |           |
|---|-----------|----------|-----------|
| H | 2.017266  | 5.295235 | -0.389090 |
| H | 3.481973  | 4.874158 | -1.321693 |
| C | -0.345515 | 3.076226 | 2.456268  |
| H | 0.354010  | 3.618231 | 1.814910  |
| H | -1.273315 | 3.656183 | 2.516667  |
| H | 0.078228  | 3.007121 | 3.464613  |
| C | 1.964696  | 1.223987 | 2.401487  |
| H | 2.720946  | 0.443681 | 2.262027  |
| H | 2.319447  | 2.113868 | 1.880939  |
| H | 1.907852  | 1.436681 | 3.480768  |

### 59

B3LYP SCF energy: -1443.70214267 a.u.  
 B3LYP enthalpy: -1443.059677 a.u.  
 B3LYP free energy: -1443.166106 a.u.  
 M06 SCF energy in solution: -1444.10944424 a.u.  
 M06 enthalpy in solution: -1443.466979 a.u.  
 M06 free energy in solution: -1443.573408 a.u.

### Cartesian coordinates

| ATOM | X         | Y         | Z         |
|------|-----------|-----------|-----------|
| O    | -0.381242 | 2.660277  | -1.656390 |
| O    | 1.018827  | 2.955734  | 0.051511  |
| C    | 0.909699  | 0.538642  | 2.018794  |
| C    | 0.367910  | 3.392027  | -0.966512 |
| H    | 0.886373  | -0.493341 | 2.382380  |
| C    | -1.307376 | 1.514682  | 0.982737  |
| C    | -0.510071 | 1.238570  | 2.305906  |
| H    | -1.472096 | 2.575710  | 0.791564  |
| H    | -2.220817 | 0.934485  | 0.886688  |
| H    | -1.083132 | 0.478965  | 2.849254  |
| C    | 0.548023  | 4.862187  | -1.319613 |
| H    | 1.594224  | 5.053891  | -1.584927 |
| H    | 0.317291  | 5.486924  | -0.449792 |
| H    | -0.095365 | 5.141496  | -2.156644 |
| Ru   | 0.380972  | 0.843919  | 0.099416  |
| C    | -0.140575 | -1.089808 | -0.172550 |
| C    | 1.425008  | 0.448860  | -1.673215 |
| N    | 0.875246  | -2.003228 | -0.358363 |
| N    | -1.300449 | -1.744502 | -0.434371 |
| C    | 2.517443  | -0.339070 | -1.053637 |
| H    | 0.800265  | -0.117645 | -2.369532 |
| H    | 1.767400  | 1.373047  | -2.136965 |
| C    | 0.411079  | -3.230329 | -1.032277 |
| C    | 2.236338  | -1.575599 | -0.419076 |
| C    | -1.099242 | -3.165542 | -0.784205 |
| C    | -2.639078 | -1.236676 | -0.327532 |
| C    | 3.836374  | 0.140021  | -1.024157 |
| H    | 0.867410  | -4.128203 | -0.611345 |
| H    | 0.659157  | -3.186038 | -2.101768 |
| C    | 3.254967  | -2.325638 | 0.190203  |
| H    | -1.692653 | -3.431156 | -1.663751 |
| H    | -1.407902 | -3.812195 | 0.046589  |
| C    | -3.183156 | -0.494319 | -1.393796 |
| C    | -3.403491 | -1.543220 | 0.813728  |
| C    | 4.876188  | -0.598259 | -0.453684 |
| H    | 4.044828  | 1.105274  | -1.479357 |
| C    | 4.563313  | -1.825462 | 0.140823  |
| C    | 2.974345  | -3.610190 | 0.934747  |
| C    | -4.507127 | -0.058597 | -1.284413 |
| C    | -2.368674 | -0.134380 | -2.612537 |
| C    | -4.723215 | -1.082117 | 0.874145  |
| C    | -2.833008 | -2.335219 | 1.968612  |
| C    | 6.298819  | -0.089366 | -0.488098 |
| H    | 5.356110  | -2.400506 | 0.615315  |
| H    | 2.028170  | -3.552139 | 1.483738  |
| H    | 3.771618  | -3.818524 | 1.654824  |
| H    | 2.914751  | -4.477475 | 0.262973  |
| C    | -5.293165 | -0.336824 | -0.161334 |
| H    | -4.933528 | 0.518629  | -2.102212 |
| H    | -1.694316 | 0.703875  | -2.397547 |

|   |           |           |           |
|---|-----------|-----------|-----------|
| H | -3.024225 | 0.165068  | -3.436312 |
| H | -1.753592 | -0.973648 | -2.956292 |
| H | -5.316503 | -1.306784 | 1.758283  |
| H | -1.782136 | -2.088865 | 2.150176  |
| H | -2.889458 | -3.417836 | 1.790457  |
| H | -3.392760 | -2.133685 | 2.887182  |
| H | 6.780019  | -0.317392 | -1.448709 |
| H | 6.907842  | -0.546836 | 0.298687  |
| H | 6.336919  | 0.997577  | -0.357489 |
| C | -6.710492 | 0.178105  | -0.063224 |
| H | -7.287261 | -0.373716 | 0.686165  |
| H | -7.233721 | 0.096190  | -1.022566 |
| H | -6.726895 | 1.237776  | 0.223584  |
| C | -0.394690 | 2.524111  | 3.136421  |
| H | 0.145895  | 2.352730  | 4.074025  |
| H | 0.129359  | 3.297338  | 2.567396  |
| H | -1.393754 | 2.900761  | 3.384787  |
| C | 2.173290  | 1.247325  | 2.480388  |
| H | 2.228516  | 1.308783  | 3.578316  |
| H | 3.049104  | 0.679217  | 2.144210  |
| H | 2.251237  | 2.258328  | 2.072591  |

### TS22-monodentateNO3

B3LYP SCF energy: -1536.00941184 a.u.  
 B3LYP enthalpy: -1535.348797 a.u.  
 B3LYP free energy: -1535.450126 a.u.  
 M06 SCF energy in solution: -1536.43168049 a.u.  
 M06 enthalpy in solution: -1535.771066 a.u.  
 M06 free energy in solution: -1535.872395 a.u.  
 Imaginary frequency: -174.2899 cm<sup>-1</sup>

### Cartesian coordinates

| ATOM | X         | Y         | Z         |
|------|-----------|-----------|-----------|
| Ru   | -0.334003 | 0.765807  | -0.139498 |
| O    | -1.380717 | 2.663318  | -0.515874 |
| O    | -2.130808 | 3.299327  | 1.455746  |
| N    | -0.559532 | -2.121634 | -0.120138 |
| N    | 1.580222  | -1.765486 | 0.184198  |
| C    | 0.379240  | -1.144566 | -0.031938 |
| C    | -0.054902 | -3.453478 | 0.224424  |
| H    | -0.413274 | -4.214574 | -0.474356 |
| H    | -0.375946 | -3.739763 | 1.235236  |
| C    | 1.462223  | -3.240045 | 0.145983  |
| H    | 2.006993  | -3.692115 | 0.980100  |
| H    | 1.885254  | -3.630413 | -0.788353 |
| C    | -1.978484 | -1.747779 | -0.091518 |
| C    | -2.520534 | -1.785611 | 1.361312  |
| H    | -1.883200 | -1.155282 | 1.992638  |
| H    | -2.472400 | -2.811935 | 1.753306  |
| C    | -3.975935 | -1.280112 | 1.393413  |
| H    | -4.345916 | -1.317072 | 2.426652  |
| C    | -4.844516 | -2.187995 | 0.498630  |
| H    | -4.836894 | -3.219218 | 0.880942  |
| H    | -5.888580 | -1.848252 | 0.517729  |
| C    | -4.307641 | -2.151217 | -0.947589 |
| H    | -4.924458 | -2.796483 | -1.587225 |
| C    | -2.851361 | -2.674294 | -0.969373 |
| H    | -2.459894 | -2.683267 | -1.995709 |
| H    | -2.825529 | -3.710130 | -0.598745 |
| C    | -4.356480 | -0.698489 | -1.466746 |
| H    | -4.007186 | -0.654257 | -2.507767 |
| H    | -5.395055 | -0.339475 | -1.464460 |
| C    | -3.477594 | 0.215635  | -0.572439 |
| H    | -3.517611 | 1.240396  | -0.950759 |
| C    | -2.035275 | -0.311410 | -0.635305 |
| H    | -1.728047 | -0.345526 | -1.708678 |
| C    | -4.017067 | 0.170432  | 0.872120  |
| H    | -3.422406 | 0.828785  | 1.515784  |
| H    | -5.048034 | 0.548107  | 0.894498  |
| C    | 2.896593  | -1.199238 | 0.116804  |
| C    | 3.585437  | -0.894816 | 1.304545  |

|   |           |           |           |   |           |           |           |
|---|-----------|-----------|-----------|---|-----------|-----------|-----------|
| C | 4.895804  | -0.403522 | 1.211214  | H | -2.686559 | -2.197042 | -2.164602 |
| H | 5.428859  | -0.163335 | 2.129209  | H | -3.142178 | -3.369811 | -0.916216 |
| C | 5.534802  | -0.221451 | -0.014979 | C | -4.453907 | -0.170099 | -1.384808 |
| C | 4.834322  | -0.563206 | -1.179300 | H | -4.096839 | -0.101028 | -2.410874 |
| H | 5.319476  | -0.443970 | -2.146027 | H | -5.466620 | 0.254233  | -1.329076 |
| C | 3.530542  | -1.059962 | -1.139617 | C | -3.513182 | 0.549892  | -0.382189 |
| C | 2.974979  | -1.090753 | 2.674185  | H | -3.491731 | 1.618067  | -0.619009 |
| H | 2.826164  | -0.129662 | 3.182106  | C | -2.111346 | -0.064433 | -0.542730 |
| H | 3.638417  | -1.687046 | 3.311581  | H | -1.845221 | -0.023653 | -1.608659 |
| H | 2.005531  | -1.589767 | 2.623867  | C | -4.062629 | 0.352264  | 1.044985  |
| C | 6.937268  | 0.334957  | -0.093663 | H | -3.418661 | 0.865607  | 1.769271  |
| H | 6.929570  | 1.380462  | -0.428203 | H | -5.061651 | 0.802604  | 1.126171  |
| H | 7.551566  | -0.226461 | -0.806824 | C | 2.728136  | -1.317993 | -0.177569 |
| H | 7.435673  | 0.304574  | 0.880290  | C | 3.645680  | -1.421354 | 0.883864  |
| C | 2.837665  | -1.450547 | -2.426780 | C | 4.962081  | -0.992334 | 0.674345  |
| H | 1.789583  | -1.136663 | -2.444748 | H | 5.672463  | -1.062461 | 1.495552  |
| H | 2.851802  | -2.538333 | -2.576398 | C | 5.387674  | -0.485047 | -0.555590 |
| H | 3.342125  | -1.001701 | -3.287672 | C | 4.457316  | -0.419075 | -1.599571 |
| C | -0.000840 | 1.099669  | 1.652541  | H | 4.772537  | -0.039384 | -2.569369 |
| H | 0.605949  | 0.490491  | 2.330220  | C | 3.131054  | -0.829920 | -1.439632 |
| C | 1.492886  | 1.817007  | -1.011851 | C | 3.246814  | -2.003729 | 2.220587  |
| H | 2.102336  | 0.977384  | -1.329072 | H | 3.951668  | -1.702882 | 3.001884  |
| C | 1.674400  | 2.214270  | 0.322212  | H | 3.243279  | -3.102091 | 2.195162  |
| H | 2.366944  | 1.614559  | 0.905854  | H | 2.242115  | -1.689807 | 2.518715  |
| C | 1.416368  | 3.618405  | 0.814726  | C | 6.806820  | -0.005881 | -0.754716 |
| H | 1.545216  | 3.692584  | 1.897878  | H | 7.188049  | -0.284118 | -1.743574 |
| H | 2.131991  | 4.306860  | 0.341972  | H | 7.481275  | -0.424533 | -0.000864 |
| H | 0.407441  | 3.952344  | 0.565734  | H | 6.869774  | 1.087782  | -0.680972 |
| C | 1.098113  | 2.771314  | -2.121162 | C | 2.161154  | -0.720137 | -2.593942 |
| H | 1.979854  | 3.348318  | -2.439389 | H | 1.423054  | 0.073214  | -2.424125 |
| H | 0.737969  | 2.224068  | -2.999420 | H | 1.596576  | -1.646120 | -2.750056 |
| H | 0.315093  | 3.465323  | -1.814982 | H | 2.693136  | -0.491381 | -3.522084 |
| H | -0.506905 | 1.971012  | 2.079229  | C | -0.246954 | 0.568433  | 2.142707  |
| O | -3.275214 | 3.721131  | -0.353089 | H | 0.208544  | -0.250387 | -2.714120 |
| N | -2.298193 | 3.239197  | 0.222873  | C | 1.647922  | 1.891745  | 0.207658  |
|   |           |           |           | H | 2.252012  | 1.172657  | -0.332665 |
|   |           |           |           | C | 1.549258  | 1.670655  | 1.606762  |
|   |           |           |           | H | 2.116374  | 0.820636  | 1.977139  |
|   |           |           |           | C | 1.399151  | 2.831005  | 2.572676  |
|   |           |           |           | H | 1.267886  | 2.486138  | 3.602270  |
|   |           |           |           | H | 2.304067  | 3.454200  | 2.539944  |
|   |           |           |           | H | 0.548851  | 3.465614  | 2.309484  |
|   |           |           |           | C | 1.672191  | 3.282519  | -0.384779 |
|   |           |           |           | H | 2.673488  | 3.717356  | -0.240447 |
|   |           |           |           | H | 1.474108  | 3.253722  | -1.458119 |
|   |           |           |           | H | 0.950771  | 3.958229  | 0.078796  |
|   |           |           |           | H | -0.740729 | 1.306014  | 2.788194  |
|   |           |           |           | O | -1.852301 | 4.104816  | -1.296277 |
|   |           |           |           | N | -1.344604 | 3.080121  | -0.868878 |

### TS22

B3LYP SCF energy: -1536.01999353 a.u.  
 B3LYP enthalpy: -1535.358479 a.u.  
 B3LYP free energy: -1535.456292 a.u.  
 M06 SCF energy in solution: -1536.43716588 a.u.  
 M06 enthalpy in solution: -1535.775651 a.u.  
 M06 free energy in solution: -1535.873464 a.u.  
 Imaginary frequency: -227.5934 cm<sup>-1</sup>

### Cartesian coordinates

| ATOM | X         | Y         | Z         |
|------|-----------|-----------|-----------|
| Ru   | -0.372163 | 0.812326  | 0.282362  |
| O    | -1.323965 | 2.813707  | 0.395697  |
| O    | -0.800941 | 2.207690  | -1.627150 |
| N    | -0.770994 | -2.006466 | -0.241107 |
| N    | 1.397826  | -1.822589 | 0.000776  |
| C    | 0.225556  | -1.110646 | -0.033489 |
| C    | -0.337604 | -3.402380 | -0.163458 |
| H    | -0.778991 | -4.007952 | -0.960085 |
| H    | -0.623778 | -3.845040 | 0.800808  |
| C    | 1.182741  | -3.257052 | -0.299838 |
| H    | 1.741150  | -3.889176 | 0.396171  |
| H    | 1.530074  | -3.481854 | -1.317096 |
| C    | -2.162763 | -1.554770 | -0.152171 |
| C    | -2.727031 | -1.762372 | 1.275503  |
| H    | -2.057475 | -1.289078 | 2.001699  |
| H    | -2.764560 | -2.836516 | 1.509531  |
| C    | -4.139652 | -1.154159 | 1.371575  |
| H    | -4.525280 | -1.296132 | 2.390229  |
| C    | -5.063894 | -1.866757 | 0.363586  |
| H    | -5.137082 | -2.936506 | 0.607417  |
| H    | -6.080348 | -1.454927 | 0.424467  |
| C    | -4.506289 | -1.679070 | -1.062652 |
| H    | -5.157619 | -2.190442 | -1.783935 |
| C    | -3.088782 | -2.295092 | -1.147626 |

### TS23

B3LYP SCF energy: -1536.02191790 a.u.  
 B3LYP enthalpy: -1535.360412 a.u.  
 B3LYP free energy: -1535.458405 a.u.  
 M06 SCF energy in solution: -1536.43716343 a.u.  
 M06 enthalpy in solution: -1535.775658 a.u.  
 M06 free energy in solution: -1535.873651 a.u.  
 Imaginary frequency: -218.1681 cm<sup>-1</sup>

### Cartesian coordinates

| ATOM | X         | Y         | Z         |
|------|-----------|-----------|-----------|
| Ru   | 0.302514  | 0.893695  | 0.186298  |
| O    | 1.498859  | 1.720932  | -1.750936 |
| O    | 1.310328  | 2.881479  | 0.078414  |
| N    | 0.677042  | -1.987571 | 0.158841  |
| N    | -1.488121 | -1.737485 | -0.011640 |
| C    | -0.304739 | -1.052760 | 0.091253  |
| C    | 0.212210  | -3.354911 | -0.088818 |
| H    | 0.642375  | -4.060078 | 0.627463  |
| H    | 0.489277  | -3.683386 | -1.099888 |
| C    | -1.304762 | -3.200929 | 0.071439  |

|   |           |           |           |
|---|-----------|-----------|-----------|
| H | -1.875318 | -3.707798 | -0.712337 |
| H | -1.657860 | -3.572053 | 1.042935  |
| C | 2.084897  | -1.581907 | 0.098869  |
| C | 2.623073  | -1.669165 | -1.352752 |
| H | 1.995747  | -1.053646 | -2.008198 |
| H | 2.565673  | -2.707314 | -1.711812 |
| C | 4.085366  | -1.178617 | -1.403498 |
| H | 4.455254  | -1.262813 | -2.433940 |
| C | 4.955761  | -2.039528 | -0.467217 |
| H | 4.947079  | -3.090851 | -0.790226 |
| H | 5.999770  | -1.700948 | -0.509867 |
| C | 4.420361  | -1.923481 | 0.974392  |
| C | 5.041605  | -2.526605 | 1.650204  |
| H | 2.971979  | -2.462770 | 1.012042  |
| H | 2.574258  | -2.439955 | 2.035782  |
| H | 2.966911  | -3.512515 | 0.681085  |
| C | 4.455788  | -0.443223 | 1.418445  |
| H | 4.112286  | -0.351993 | 2.458319  |
| H | 5.491990  | -0.076832 | 1.391241  |
| C | 3.561031  | 0.412955  | 0.478829  |
| H | 3.591675  | 1.459141  | 0.804761  |
| C | 2.123368  | -0.133223 | 0.612485  |
| H | 1.914954  | -0.182502 | 1.694240  |
| C | 4.132453  | 0.293211  | -0.951235 |
| H | 3.569755  | 0.914240  | -1.649992 |
| H | 5.172019  | 0.650235  | -0.957959 |
| C | -2.823218 | -1.230025 | -0.120034 |
| C | -3.362753 | -1.016433 | -1.407814 |
| C | -4.677129 | -0.557852 | -1.514747 |
| H | -5.090653 | -0.378118 | -2.504963 |
| C | -5.478321 | -0.334772 | -0.387585 |
| C | -4.937188 | -0.614014 | 0.868354  |
| H | -5.554144 | -0.479731 | 1.754936  |
| C | -3.623063 | -1.075992 | 1.027285  |
| C | -2.562522 | -1.320780 | -2.654963 |
| H | -3.060418 | -0.918474 | -3.542181 |
| H | -2.460014 | -2.404576 | -2.801460 |
| H | -1.549981 | -0.909174 | -2.614611 |
| C | -6.885784 | 0.195226  | -0.532603 |
| H | -6.885401 | 1.283230  | -0.680149 |
| H | -7.487207 | -0.014453 | 0.357798  |
| H | -7.392988 | -0.246752 | -1.397397 |
| C | -3.138646 | -1.450286 | 2.410777  |
| H | -2.051067 | -1.529287 | 2.463360  |
| H | -3.558519 | -2.418302 | 2.715834  |
| H | -3.463843 | -0.715346 | 3.155310  |
| C | -1.286237 | 1.763876  | -1.027170 |
| H | -1.792114 | 0.984177  | -1.580647 |
| C | -0.616343 | 1.199989  | 1.816581  |
| H | -1.422055 | 0.570210  | 2.204277  |
| C | -1.808521 | 2.155054  | 0.237128  |
| H | -2.652199 | 1.571403  | 0.597449  |
| C | -1.800245 | 3.617602  | 0.628995  |
| H | -2.575596 | 4.139529  | 0.051413  |
| H | -2.023666 | 3.775297  | 1.687600  |
| H | -0.836940 | 4.080097  | 0.398998  |
| H | -0.822159 | 2.530361  | -1.643093 |
| C | -0.125722 | 2.201105  | 2.827322  |
| H | -0.942088 | 2.737694  | 3.331217  |
| H | 0.405210  | 1.635751  | 3.610281  |
| H | 0.576369  | 2.923845  | 2.404068  |
| O | 2.470334  | 3.681416  | -1.603316 |
| N | 1.786986  | 2.791744  | -1.121004 |

Imaginary frequency: -109.1007 cm-1

Cartesian coordinates

| ATOM | X         | Y         | Z         |
|------|-----------|-----------|-----------|
| Ru   | -0.240243 | 0.943001  | 0.275833  |
| O    | -1.223888 | 2.936997  | 0.194898  |
| O    | -0.561975 | 2.059316  | -1.672216 |
| N    | -0.753217 | -1.922879 | -0.168064 |
| N    | 1.420095  | -1.750965 | 0.041572  |
| C    | 0.249150  | -1.035661 | 0.017060  |
| C    | -0.322161 | -3.322546 | -0.118696 |
| H    | -0.763877 | -3.905312 | -0.931514 |
| H    | -0.621464 | -3.783216 | 0.832303  |
| C    | 1.199301  | -3.187053 | -0.242006 |
| H    | 1.747158  | -3.812500 | 0.468379  |
| H    | 1.558039  | -3.427434 | -1.251318 |
| C    | -2.157802 | -1.491295 | -0.160637 |
| C    | -2.820841 | -1.774301 | 1.210100  |
| H    | -2.223040 | -1.340198 | 2.013118  |
| H    | -2.866643 | -2.859554 | 1.386872  |
| C    | -4.244107 | -1.183824 | 1.229361  |
| H    | -4.700285 | -1.371302 | 2.211049  |
| C    | -5.083817 | -1.863523 | 0.129408  |
| H    | -5.159816 | -2.942932 | 0.325347  |
| H    | -6.107454 | -1.464987 | 0.132393  |
| C    | -4.426736 | -1.611562 | -1.243114 |
| H    | -5.016510 | -2.101397 | -2.029558 |
| C    | -2.997949 | -2.213629 | -1.245358 |
| H    | -2.524664 | -2.076120 | -2.226565 |
| H    | -3.063186 | -3.297166 | -1.058532 |
| C    | -4.380573 | -0.088131 | -1.496965 |
| H    | -3.961102 | 0.122546  | -2.489478 |
| H    | -5.404965 | 0.313132  | -1.490545 |
| C    | -3.514805 | 0.597686  | -0.406120 |
| H    | -3.491940 | 1.677500  | -0.592662 |
| C    | -2.094018 | 0.003566  | -0.498218 |
| H    | -1.816613 | 0.047893  | -1.561346 |
| C    | -4.163460 | 0.335428  | 0.968698  |
| H    | -3.585556 | 0.826104  | 1.762020  |
| H    | -5.172792 | 0.769822  | 0.995924  |
| C    | 2.753882  | -1.259445 | -0.143200 |
| C    | 3.660123  | -1.337399 | 0.930358  |
| C    | 4.976387  | -0.908641 | 0.725408  |
| H    | 5.679426  | -0.959489 | 1.554264  |
| C    | 5.411238  | -0.422312 | -0.511063 |
| C    | 4.491459  | -0.382723 | -1.565065 |
| H    | 4.816183  | -0.025243 | -2.540249 |
| C    | 3.164731  | -0.797528 | -1.410841 |
| C    | 3.236464  | -1.867302 | 2.280951  |
| H    | 4.002298  | -1.662095 | 3.034996  |
| H    | 3.082189  | -2.954253 | 2.261217  |
| H    | 2.295038  | -1.420250 | 2.615934  |
| C    | 6.830176  | 0.060545  | -0.703567 |
| H    | 7.505878  | -0.373062 | 0.040771  |
| H    | 6.894208  | 1.152509  | -0.607163 |
| H    | 7.209651  | -0.197805 | -1.698272 |
| C    | 2.210124  | -0.727676 | -2.581151 |
| H    | 1.667894  | -1.668553 | -2.728380 |
| H    | 2.752705  | -0.508494 | -3.505587 |
| H    | 1.454377  | 0.053500  | -2.440240 |
| C    | -0.493538 | 0.456318  | 2.364226  |
| H    | -0.314776 | -0.585316 | 2.617561  |
| H    | -1.473523 | 0.833962  | 2.655075  |
| C    | 1.591015  | 1.619419  | 0.178898  |
| H    | 2.443047  | 1.067157  | 0.584751  |
| C    | 0.593525  | 1.368517  | 2.371924  |
| H    | 1.581007  | 0.941332  | 2.530146  |
| C    | 2.101940  | 2.813341  | -0.563171 |
| H    | 2.720450  | 3.412773  | 0.124874  |
| H    | 2.789218  | 2.483520  | -1.358580 |
| H    | 1.338256  | 3.453092  | -1.004964 |
| C    | 0.433292  | 2.794575  | 2.846612  |
| H    | 0.488454  | 2.814173  | 3.945296  |

**TS25'**

B3LYP SCF energy: -1535.99618155 a.u.  
 B3LYP enthalpy: -1535.335006 a.u.  
 B3LYP free energy: -1535.433988 a.u.  
 M06 SCF energy in solution: -1536.41625131 a.u.  
 M06 enthalpy in solution: -1535.755076 a.u.  
 M06 free energy in solution: -1535.854058 a.u.

|   |           |          |           |
|---|-----------|----------|-----------|
| H | 1.219476  | 3.452708 | 2.462677  |
| H | -0.531525 | 3.211794 | 2.548032  |
| N | -1.172480 | 3.029347 | -1.087709 |
| O | -1.658299 | 3.962876 | -1.698715 |

**TS24**

B3LYP SCF energy: -1496.70896418 a.u.  
 B3LYP enthalpy: -1496.077210 a.u.  
 B3LYP free energy: -1496.172693 a.u.  
 M06 SCF energy in solution: -1497.14366531 a.u.  
 M06 enthalpy in solution: -1496.511911 a.u.  
 M06 free energy in solution: -1496.607394 a.u.  
 Imaginary frequency: -123.8859 cm<sup>-1</sup>

Cartesian coordinates

| ATOM | X         | Y         | Z         |
|------|-----------|-----------|-----------|
| Ru   | 0.265473  | 0.987159  | 0.291664  |
| O    | 1.345493  | 1.833163  | -1.648188 |
| O    | 1.280941  | 2.974636  | 0.201298  |
| N    | 0.604989  | -1.888786 | 0.128945  |
| N    | -1.559135 | -1.593949 | -0.004757 |
| C    | -0.362867 | -0.936813 | 0.115982  |
| C    | 0.112929  | -3.233224 | -0.183639 |
| H    | 0.539630  | -3.982469 | 0.488664  |
| H    | 0.370449  | -3.513129 | -1.214414 |
| C    | -1.399900 | -3.062656 | 0.005393  |
| H    | -1.989212 | -3.521926 | -0.793713 |
| H    | -1.746325 | -3.474776 | 0.962737  |
| C    | 2.016264  | -1.493428 | 0.044266  |
| C    | 2.498742  | -1.494116 | -1.429647 |
| H    | 1.855092  | -0.832675 | -2.021003 |
| H    | 2.417085  | -2.506772 | -1.851523 |
| C    | 3.963068  | -1.013836 | -1.505492 |
| H    | 4.293317  | -1.036417 | -2.552487 |
| C    | 4.858217  | -1.939434 | -0.658670 |
| H    | 4.825660  | -2.968214 | -1.046394 |
| H    | 5.903664  | -1.608103 | -0.719814 |
| C    | 4.378224  | -1.909399 | 0.806747  |
| H    | 5.017691  | -2.559059 | 1.419539  |
| C    | 2.926164  | -2.438013 | 0.865515  |
| H    | 2.567747  | -2.476766 | 1.903192  |
| H    | 2.897865  | -3.464707 | 0.469534  |
| C    | 4.448606  | -0.459633 | 1.339367  |
| H    | 4.146233  | -0.429886 | 2.395409  |
| H    | 5.487805  | -0.103396 | 1.294690  |
| C    | 3.528026  | 0.461697  | 0.490715  |
| H    | 3.583033  | 1.485772  | 0.878702  |
| C    | 2.089521  | -0.079851 | 0.650167  |
| H    | 1.939155  | -0.207580 | 1.731841  |
| C    | 4.043938  | 0.426388  | -0.965005 |
| H    | 3.465200  | 1.093829  | -1.605061 |
| H    | 5.086817  | 0.773061  | -0.989038 |
| C    | -2.878218 | -1.050393 | -0.127568 |
| C    | -3.370550 | -0.760163 | -1.419670 |
| C    | -4.672370 | -0.272061 | -1.545229 |
| H    | -5.050570 | -0.035952 | -2.537711 |
| C    | -5.504575 | -0.085983 | -0.433392 |
| C    | -5.007642 | -0.431161 | 0.824047  |
| H    | -5.648450 | -0.322514 | 1.697162  |
| C    | -3.708048 | -0.927465 | 1.000944  |
| C    | -2.525578 | -1.000791 | -2.650727 |
| H    | -3.037766 | -0.639088 | -3.547185 |
| H    | -2.326879 | -2.070835 | -2.794503 |
| H    | -1.551926 | -0.504045 | -2.590989 |
| C    | -6.896887 | 0.477475  | -0.597168 |
| H    | -6.870038 | 1.568520  | -0.716908 |
| H    | -7.523570 | 0.258081  | 0.273180  |
| H    | -7.392459 | 0.068443  | -1.484710 |
| C    | -3.267754 | -1.359969 | 2.381755  |
| H    | -2.187208 | -1.502576 | 2.445171  |
| H    | -3.746436 | -2.308336 | 2.660017  |

|   |           |           |           |
|---|-----------|-----------|-----------|
| H | -3.560325 | -0.623678 | 3.138725  |
| C | -1.410184 | 2.051275  | -0.801655 |
| H | -1.945810 | 1.337775  | -1.412313 |
| C | -0.488215 | 1.172272  | 2.013769  |
| H | -1.268721 | 0.524822  | 2.430707  |
| C | -1.806182 | 2.264869  | 0.520289  |
| H | -2.643132 | 1.707765  | 0.927988  |
| O | 2.373367  | 3.767496  | -1.529498 |
| N | 1.693807  | 2.892174  | -1.019018 |
| H | -0.892398 | 2.839758  | -1.335713 |
| C | -0.009535 | 2.196598  | 3.004914  |
| H | 0.527248  | 1.659018  | 3.803390  |
| H | 0.677698  | 2.924046  | 2.565068  |
| H | -0.840945 | 2.726705  | 3.493085  |
| H | -1.567208 | 3.208772  | 1.000321  |

**TS26**

B3LYP SCF energy: -1496.70717925 a.u.  
 B3LYP enthalpy: -1496.075711 a.u.  
 B3LYP free energy: -1496.170197 a.u.  
 M06 SCF energy in solution: -1497.14310145 a.u.  
 M06 enthalpy in solution: -1496.511633 a.u.  
 M06 free energy in solution: -1496.606119 a.u.  
 Imaginary frequency: -200.2683 cm<sup>-1</sup>

Cartesian coordinates

| ATOM | X         | Y         | Z         |
|------|-----------|-----------|-----------|
| Ru   | -0.338312 | 0.861051  | 0.440990  |
| O    | -1.310578 | 2.849098  | 0.633724  |
| O    | -0.630007 | 2.369175  | -1.376799 |
| N    | -0.725128 | -1.896099 | -0.341229 |
| N    | 1.443886  | -1.722097 | -0.084730 |
| C    | 0.265291  | -1.021495 | -0.039148 |
| C    | -0.279251 | -3.287636 | -0.417396 |
| H    | -0.724187 | -3.810529 | -1.268615 |
| H    | -0.548313 | -3.832516 | 0.498458  |
| C    | 1.238035  | -3.111663 | -0.555188 |
| H    | 1.810821  | -3.819284 | 0.050099  |
| H    | 1.571080  | -3.206176 | -1.597571 |
| C    | -2.120584 | -1.458139 | -0.235609 |
| C    | -2.717150 | -1.806430 | 1.150772  |
| H    | -2.068133 | -1.405253 | 1.936292  |
| H    | -2.753998 | -2.898626 | 1.276986  |
| C    | -4.133784 | -1.212240 | 1.271827  |
| H    | -4.543216 | -1.454167 | 2.261910  |
| C    | -5.032279 | -1.822031 | 0.176649  |
| H    | -5.109150 | -2.910525 | 0.312451  |
| H    | -6.050821 | -1.417938 | 0.253975  |
| C    | -4.441837 | -1.494759 | -1.210585 |
| H    | -5.073887 | -1.934115 | -1.993823 |
| C    | -3.021080 | -2.099276 | -1.320120 |
| H    | -2.594255 | -1.903861 | -2.312563 |
| H    | -3.078479 | -3.191218 | -1.194438 |
| C    | -4.389102 | 0.038781  | -1.381226 |
| H    | -4.009593 | 0.300066  | -2.377913 |
| H    | -5.405031 | 0.452127  | -1.306620 |
| C    | -3.473938 | 0.657486  | -0.291469 |
| H    | -3.450078 | 1.744247  | -0.418051 |
| C    | -2.067305 | 0.063550  | -0.482350 |
| H    | -1.785550 | 0.202659  | -1.536131 |
| C    | -4.052074 | 0.318703  | 1.097335  |
| H    | -3.422858 | 0.756715  | 1.881827  |
| H    | -5.052742 | 0.760089  | 1.203816  |
| C    | 2.766456  | -1.180159 | -0.201098 |
| C    | 3.691174  | -1.418002 | 0.834077  |
| C    | 4.998317  | -0.942559 | 0.686425  |
| H    | 5.712921  | -1.117503 | 1.488192  |
| C    | 5.410174  | -0.255793 | -0.459691 |
| C    | 4.476097  | -0.060469 | -1.482038 |
| H    | 4.781752  | 0.456974  | -2.388982 |
| C    | 3.156187  | -0.514519 | -1.382027 |

|   |           |           |           |
|---|-----------|-----------|-----------|
| C | 3.303228  | -2.185706 | 2.077329  |
| H | 4.035235  | -2.028111 | 2.875266  |
| H | 3.260416  | -3.266435 | 1.886163  |
| H | 2.316528  | -1.891209 | 2.448613  |
| C | 6.819396  | 0.275420  | -0.582687 |
| H | 6.904667  | 1.276502  | -0.139456 |
| H | 7.126610  | 0.357003  | -1.630513 |
| H | 7.538356  | -0.369793 | -0.066458 |
| C | 2.187341  | -0.271304 | -2.516994 |
| H | 1.443506  | 0.491505  | -2.257609 |
| H | 1.630056  | -1.175730 | -2.785187 |
| H | 2.720482  | 0.070504  | -3.409114 |
| C | -0.330051 | 0.453074  | 2.276323  |
| H | 0.077562  | -0.416346 | 2.807700  |
| C | 1.682580  | 2.010326  | 0.578884  |
| H | 2.276428  | 1.456226  | -0.140395 |
| C | 1.566593  | 1.444149  | 1.858848  |
| H | 2.113525  | 0.537046  | 2.084794  |
| O | -1.730366 | 4.233409  | -1.014254 |
| N | -1.242476 | 3.191594  | -0.608080 |
| H | -0.816916 | 1.165519  | 2.957071  |
| C | 1.631022  | 3.503077  | 0.362305  |
| H | 2.638567  | 3.920424  | 0.504614  |
| H | 1.318296  | 3.748701  | -0.655481 |
| H | 0.956181  | 3.997094  | 1.066257  |
| H | 1.372878  | 2.108144  | 2.698871  |

### TS33

B3LYP SCF energy: -1536.01451892 a.u.  
 B3LYP enthalpy: -1535.353048 a.u.  
 B3LYP free energy: -1535.449742 a.u.  
 M06 SCF energy in solution: -1536.43121933 a.u.  
 M06 enthalpy in solution: -1535.769748 a.u.  
 M06 free energy in solution: -1535.866442 a.u.  
 Imaginary frequency: -214.5273 cm<sup>-1</sup>

### Cartesian coordinates

| ATOM | X         | Y         | Z         |
|------|-----------|-----------|-----------|
| Ru   | -0.410854 | 0.833347  | 0.420212  |
| O    | -1.383470 | 2.822801  | 0.575248  |
| O    | -0.726288 | 2.304254  | -1.433152 |
| N    | -0.779884 | -1.942129 | -0.312518 |
| N    | 1.394887  | -1.759827 | -0.144588 |
| C    | 0.214997  | -1.060104 | -0.045166 |
| C    | -0.334018 | -3.330904 | -0.412187 |
| H    | -0.817001 | -3.854401 | -1.241676 |
| H    | -0.555937 | -3.878642 | 0.514937  |
| C    | 1.170847  | -3.144623 | -0.623362 |
| H    | 1.777048  | -3.857641 | -0.059196 |
| H    | 1.451440  | -3.219295 | -1.682964 |
| C    | -2.175580 | -1.505440 | -0.227022 |
| C    | -2.783138 | -1.816170 | 1.162613  |
| H    | -2.138960 | -1.396717 | 1.942493  |
| H    | -2.821935 | -2.904782 | 1.316274  |
| C    | -4.199894 | -1.216788 | 1.256163  |
| H    | -4.617787 | -1.429583 | 2.249384  |
| C    | -5.090530 | -1.856042 | 0.171436  |
| H    | -5.169411 | -2.940296 | 0.336480  |
| H    | -6.109241 | -1.449220 | 0.229476  |
| C    | -4.489220 | -1.568123 | -1.219797 |
| H    | -5.115327 | -2.029359 | -1.995196 |
| C    | -3.068381 | -2.176898 | -1.300560 |
| H    | -2.633468 | -2.010266 | -2.294927 |
| H    | -3.129308 | -3.264627 | -1.144710 |
| C    | -4.433200 | -0.040412 | -1.434211 |
| H    | -4.045601 | 0.191950  | -2.434989 |
| H    | -5.448959 | 0.376541  | -1.379541 |
| C    | -3.525685 | 0.608153  | -0.355371 |
| H    | -3.501414 | 1.690702  | -0.513036 |
| C    | -2.118342 | 0.006830  | -0.518965 |
| H    | -1.827632 | 0.113546  | -1.573504 |

|   |           |           |           |
|---|-----------|-----------|-----------|
| C | -4.116290 | 0.308743  | 1.037772  |
| H | -3.495930 | 0.769916  | 1.815858  |
| H | -5.118192 | 0.752273  | 1.121161  |
| C | 2.713310  | -1.229612 | -0.332323 |
| C | 3.718386  | -1.570425 | 0.593401  |
| C | 5.018117  | -1.097511 | 0.377371  |
| H | 5.792931  | -1.350346 | 1.098490  |
| C | 5.346370  | -0.319055 | -0.734758 |
| C | 4.334929  | -0.033357 | -1.658852 |
| H | 4.575660  | 0.548647  | -2.546187 |
| C | 3.021262  | -0.481237 | -1.489829 |
| C | 3.435167  | -2.454445 | 1.787253  |
| H | 4.125732  | -2.235424 | 2.607923  |
| H | 3.565842  | -3.515939 | 1.534979  |
| H | 2.411673  | -2.331485 | 2.152321  |
| C | 6.748428  | 0.208412  | -0.932641 |
| H | 7.018584  | 0.239113  | -1.993807 |
| H | 7.487120  | -0.409458 | -0.411557 |
| H | 6.845622  | 1.231214  | -0.544842 |
| C | 1.979155  | -0.152615 | -2.533511 |
| H | 1.299703  | 0.638675  | -2.196481 |
| H | 1.354499  | -1.018681 | -2.778572 |
| H | 2.458250  | 0.187837  | -3.456493 |
| C | -0.448551 | 0.459291  | 2.256704  |
| H | 0.004915  | -0.376558 | 2.801947  |
| C | 1.627579  | 1.940443  | 0.613112  |
| H | 2.377586  | 1.255990  | 0.227173  |
| C | 1.299916  | 1.779694  | 1.977846  |
| C | 1.650335  | 3.313838  | -0.022641 |
| H | 2.636996  | 3.767114  | 0.157127  |
| H | 1.497067  | 3.272624  | -1.102880 |
| H | 0.898661  | 3.978025  | 0.412158  |
| H | -1.025530 | 1.126000  | 2.913753  |
| H | 0.797697  | 2.631762  | 2.435893  |
| C | 2.200165  | 0.984744  | 2.905355  |
| H | 1.727212  | 0.748729  | 3.862907  |
| H | 2.534266  | 0.058228  | 2.434602  |
| H | 3.094137  | 1.587368  | 3.119096  |
| O | -1.824042 | 4.173746  | -1.094916 |
| N | -1.329749 | 3.139964  | -0.675756 |

### TS36

B3LYP SCF energy: -1536.01855539 a.u.  
 B3LYP enthalpy: -1535.356806 a.u.  
 B3LYP free energy: -1535.454163 a.u.  
 M06 SCF energy in solution: -1536.43422044 a.u.  
 M06 enthalpy in solution: -1535.772471 a.u.  
 M06 free energy in solution: -1535.869828 a.u.  
 Imaginary frequency: -241.2579 cm<sup>-1</sup>

### Cartesian coordinates

| ATOM | X         | Y         | Z         |
|------|-----------|-----------|-----------|
| Ru   | 0.352682  | 0.940273  | 0.246824  |
| O    | 1.539691  | 1.810687  | -1.694387 |
| O    | 1.436404  | 2.887791  | 0.192597  |
| N    | 0.657408  | -1.950992 | 0.146528  |
| N    | -1.502787 | -1.660435 | 0.008443  |
| C    | -0.308058 | -0.995417 | 0.105248  |
| C    | 0.168229  | -3.307476 | -0.109364 |
| H    | 0.592552  | -4.025250 | 0.597811  |
| H    | 0.432708  | -3.631964 | -1.125123 |
| C    | -1.342770 | -3.129165 | 0.065426  |
| H    | -1.928946 | -3.609825 | -0.723286 |
| H    | -1.694631 | -3.511797 | 1.032245  |
| C    | 2.072226  | -1.578734 | 0.076749  |
| C    | 2.591377  | -1.652430 | -1.383263 |
| H    | 1.969046  | -1.012865 | -2.020265 |
| H    | 2.507469  | -2.682747 | -1.758946 |
| C    | 4.062647  | -1.190954 | -1.444027 |
| H    | 4.418197  | -1.265437 | -2.480244 |
| C    | 4.926648  | -2.084677 | -0.532960 |



|   |           |           |           |
|---|-----------|-----------|-----------|
| H | 4.893509  | -3.129866 | -0.873735 |
| H | 5.976567  | -1.765911 | -0.582416 |
| C | 4.410555  | -1.983143 | 0.916842  |
| H | 5.027487  | -2.610070 | 1.574674  |
| C | 2.952107  | -2.494331 | 0.962987  |
| H | 2.567315  | -2.482491 | 1.991833  |
| H | 2.921889  | -3.537317 | 0.612905  |
| C | 4.480965  | -0.511874 | 1.385382  |
| H | 4.150686  | -0.431341 | 2.430385  |
| H | 5.523835  | -0.165608 | 1.352430  |
| C | 3.593311  | 0.378209  | 0.470641  |
| H | 3.648749  | 1.417465  | 0.814115  |
| C | 2.148007  | -0.143817 | 0.614000  |
| H | 1.950287  | -0.206063 | 1.696817  |
| C | 4.144085  | 0.271702  | -0.968427 |
| H | 3.584429  | 0.914886  | -1.649510 |
| H | 5.189903  | 0.609603  | -0.983294 |
| C | -2.829384 | -1.155101 | -0.172136 |
| C | -3.270078 | -0.860746 | -1.481143 |
| C | -4.592541 | -0.450787 | -1.663554 |
| H | -4.932859 | -0.210941 | -2.668803 |
| C | -5.494213 | -0.358065 | -0.595042 |
| C | -5.040976 | -0.702491 | 0.679465  |
| H | -5.730299 | -0.654422 | 1.520240  |
| C | -3.720037 | -1.109630 | 0.914816  |
| C | -2.349271 | -1.023892 | -2.669164 |
| H | -2.839088 | -0.685710 | -3.587109 |
| H | -2.070103 | -2.076045 | -2.812094 |
| H | -1.417737 | -0.461723 | -2.550880 |
| C | -6.912896 | 0.110546  | -0.820473 |
| H | -7.559873 | -0.149638 | 0.023328  |
| H | -7.342018 | -0.332308 | -1.726389 |
| H | -6.955064 | 1.200664  | -0.944015 |
| C | -3.304759 | -1.515811 | 2.310575  |
| H | -2.231716 | -1.387464 | 2.472461  |
| H | -3.542892 | -2.571133 | 2.501666  |
| H | -3.838841 | -0.927336 | 3.063854  |
| C | -1.268686 | 1.968191  | -0.864406 |
| H | -2.029560 | 1.323384  | -1.289663 |
| C | -0.532575 | 1.263019  | 1.886083  |
| H | -1.403996 | 0.694274  | 2.228954  |
| C | -1.517482 | 2.526820  | 0.417290  |
| H | -0.684159 | 2.532772  | -1.582680 |
| C | -0.000912 | 2.210068  | 2.929835  |
| H | -0.788038 | 2.856562  | 3.347121  |
| H | 0.388110  | 1.609948  | 3.767099  |
| H | 0.812764  | 2.836487  | 2.554614  |
| H | -0.942033 | 3.417625  | 0.660094  |
| C | -2.895874 | 2.475120  | 1.045451  |
| H | -2.873651 | 2.661537  | 2.124356  |
| H | -3.507669 | 3.267731  | 0.592599  |
| H | -3.397836 | 1.523701  | 0.861065  |
| O | 2.612342  | 3.709833  | -1.465985 |
| N | 1.890725  | 2.833415  | -1.017463 |

|    |           |           |           |
|----|-----------|-----------|-----------|
| H  | -1.283379 | -3.319199 | 1.053567  |
| H  | -1.060431 | -3.337404 | -0.705417 |
| C  | 0.763138  | -2.810504 | 0.410096  |
| H  | 1.291650  | -3.469877 | -0.284467 |
| H  | 1.064597  | -3.075275 | 1.430746  |
| C  | -1.554229 | 1.962070  | -0.159869 |
| H  | -2.453252 | 1.346725  | -0.201058 |
| Cl | 0.487714  | 1.732272  | 2.296982  |
| C  | -2.488372 | -1.045149 | 0.059492  |
| C  | -5.221551 | -0.456632 | -0.122162 |
| C  | -3.092222 | -0.977771 | -1.210375 |
| C  | -3.222690 | -0.827793 | 1.239485  |
| C  | -4.584976 | -0.531140 | 1.121309  |
| C  | -4.457186 | -0.678157 | -1.273340 |
| H  | -5.161372 | -0.351212 | 2.026236  |
| H  | -4.933130 | -0.612475 | -2.249452 |
| C  | 2.471994  | -0.990516 | 0.072708  |
| C  | 5.170717  | -0.240031 | -0.086964 |
| C  | 3.181312  | -0.713193 | 1.257725  |
| C  | 3.121358  | -1.003482 | -1.181507 |
| C  | 4.460687  | -0.613149 | -1.233945 |
| C  | 4.520684  | -0.319590 | 1.145590  |
| H  | 4.964020  | -0.605350 | -2.198170 |
| H  | 5.069214  | -0.080695 | 2.054250  |
| C  | 2.421810  | -1.469104 | -2.435869 |
| H  | 1.611062  | -0.791319 | -2.715968 |
| H  | 1.996603  | -2.473304 | -2.311538 |
| H  | 3.128575  | -1.511557 | -3.270022 |
| C  | 2.587103  | -0.916157 | 2.631645  |
| H  | 3.020499  | -0.212948 | 3.348299  |
| H  | 2.809902  | -1.930901 | 2.992458  |
| H  | 1.507637  | -0.767382 | 2.649835  |
| C  | 6.602513  | 0.231303  | -0.184165 |
| H  | 6.646632  | 1.300803  | -0.428604 |
| H  | 7.148811  | -0.302505 | -0.969691 |
| H  | 7.137722  | 0.089787  | 0.760585  |
| C  | -2.292065 | -1.172184 | -2.477311 |
| H  | -2.937153 | -1.080648 | -3.356149 |
| H  | -1.820035 | -2.161743 | -2.518207 |
| H  | -1.491237 | -0.428613 | -2.565165 |
| C  | -2.559953 | -0.872234 | 2.596132  |
| H  | -2.097535 | -1.847760 | 2.793053  |
| H  | -3.292529 | -0.689125 | 3.387857  |
| H  | -1.768231 | -0.118492 | 2.680515  |
| C  | -6.701859 | -0.168888 | -0.219561 |
| H  | -7.285369 | -1.099330 | -0.222594 |
| H  | -6.946279 | 0.369770  | -1.141227 |
| H  | -7.050516 | 0.430565  | 0.627835  |
| C  | -1.757208 | 3.444616  | -0.212871 |
| H  | -2.285214 | 3.714470  | -1.139678 |
| H  | -2.383942 | 3.761521  | 0.634218  |
| H  | -0.821626 | 4.014974  | -0.175277 |

### TS38

|                              |                            |
|------------------------------|----------------------------|
| B3LYP SCF energy:            | -2175.58915930 a.u.        |
| B3LYP enthalpy:              | -2174.956822 a.u.          |
| B3LYP free energy:           | -2175.065025 a.u.          |
| M06 SCF energy in solution:  | -2176.03783512 a.u.        |
| M06 enthalpy in solution:    | -2175.405498 a.u.          |
| M06 free energy in solution: | -2175.513701 a.u.          |
| Imaginary frequency:         | -206.5483 cm <sup>-1</sup> |

### Cartesian coordinates

| ATOM | X         | Y         | Z         |
|------|-----------|-----------|-----------|
| N    | 1.024691  | -1.853182 | 0.194846  |
| C    | 0.646978  | -3.273066 | 0.357891  |
| H    | 0.961890  | -3.849836 | -0.518647 |
| C    | -0.880738 | -3.198775 | 0.501440  |
| N    | -1.166219 | -1.769505 | 0.244692  |
| H    | -1.224749 | -3.474425 | 1.504468  |
| C    | 2.413245  | -1.479036 | 0.087511  |

### 37

|                              |                     |
|------------------------------|---------------------|
| B3LYP SCF energy:            | -2018.36200465 a.u. |
| B3LYP enthalpy:              | -2017.847508 a.u.   |
| B3LYP free energy:           | -2017.950265 a.u.   |
| M06 SCF energy in solution:  | -2018.88886134 a.u. |
| M06 enthalpy in solution:    | -2018.374365 a.u.   |
| M06 free energy in solution: | -2018.477122 a.u.   |

### Cartesian coordinates

| ATOM | X         | Y         | Z         |
|------|-----------|-----------|-----------|
| Ru   | 0.156203  | 1.362190  | -0.037302 |
| Cl   | 0.763925  | 1.596019  | -2.333214 |
| C    | -0.010011 | -0.602653 | 0.070587  |
| N    | -1.103664 | -1.403088 | 0.161847  |
| N    | 1.092312  | -1.401064 | 0.136759  |
| C    | -0.758503 | -2.837952 | 0.223207  |

|    |           |           |           |
|----|-----------|-----------|-----------|
| C  | -2.536689 | -1.330466 | 0.199118  |
| C  | -5.247927 | -0.611309 | 0.122149  |
| C  | -3.179813 | -0.942188 | 1.390712  |
| C  | -3.235046 | -1.406306 | -1.021874 |
| C  | -4.584082 | -1.033972 | -1.033717 |
| C  | -4.528635 | -0.574756 | 1.320666  |
| C  | -2.460048 | -0.922167 | 2.717385  |
| C  | -2.569243 | -1.868166 | -2.295585 |
| H  | -5.128976 | -1.080669 | -1.974248 |
| H  | -5.030932 | -0.262957 | 2.234027  |
| C  | -6.714653 | -0.248009 | 0.085852  |
| C  | 5.132691  | -0.807905 | -0.106405 |
| C  | 3.033817  | -1.470527 | -1.179243 |
| C  | 3.154946  | -1.251012 | 1.266494  |
| C  | 4.503324  | -0.902205 | 1.139046  |
| C  | 4.386622  | -1.116631 | -1.246649 |
| C  | 2.302920  | -1.865960 | -2.439665 |
| C  | 2.550297  | -1.419620 | 2.639268  |
| H  | 5.078598  | -0.712307 | 2.042576  |
| H  | 4.870054  | -1.097751 | -2.220909 |
| C  | 6.581477  | -0.392407 | -0.213278 |
| H  | -2.047556 | -1.907529 | 2.969620  |
| H  | -1.625429 | -0.212408 | 2.718029  |
| H  | -2.109918 | -2.858069 | -2.181843 |
| H  | -1.779824 | -1.174667 | -2.605768 |
| H  | -7.002425 | 0.162584  | -0.887814 |
| H  | -6.963885 | 0.491464  | 0.854221  |
| H  | -7.345268 | -1.129101 | 0.265989  |
| H  | 2.245613  | -2.459926 | 2.816625  |
| H  | 1.674541  | -0.779652 | 2.775864  |
| H  | 3.001378  | -1.915607 | -3.280597 |
| H  | 1.514705  | -1.150244 | -2.694194 |
| H  | 7.046828  | -0.789195 | -1.121665 |
| H  | 7.163121  | -0.739241 | 0.647773  |
| H  | 6.676703  | 0.701000  | -0.249081 |
| C  | -0.044890 | -1.031440 | 0.110677  |
| Ru | 0.105312  | 1.027202  | -0.151280 |
| Cl | 0.370952  | 1.326914  | 2.288807  |
| Cl | -0.052989 | 0.772379  | -2.608980 |
| C  | -1.445872 | 2.077700  | -0.032046 |
| H  | 3.281973  | -1.160512 | 3.410441  |
| H  | 1.835062  | -2.853631 | -2.343175 |
| H  | -3.302322 | -1.937992 | -3.105053 |
| H  | -3.149287 | -0.641902 | 3.519925  |
| H  | -1.407893 | -3.826670 | -0.222894 |
| H  | 1.136424  | -3.697842 | 1.238991  |
| C  | 0.167989  | 3.386912  | -0.497466 |
| C  | 1.422465  | 2.696628  | -0.599023 |
| H  | -0.298047 | 3.580862  | -1.461340 |
| H  | 1.711770  | 2.444258  | -1.618132 |
| C  | -0.064551 | 4.433504  | 0.576522  |
| H  | 0.619078  | 5.277153  | 0.411692  |
| H  | -1.086454 | 4.823569  | 0.541336  |
| H  | 0.121823  | 4.031893  | 1.575522  |
| H  | -1.673308 | 2.424641  | 0.982067  |
| C  | 2.582275  | 2.922075  | 0.341947  |
| H  | 2.268487  | 3.118329  | 1.366714  |
| H  | 3.246735  | 2.051501  | 0.352504  |
| H  | 3.172593  | 3.777762  | -0.022322 |
| C  | -2.544907 | 2.323497  | -1.019785 |
| H  | -3.389655 | 1.679216  | -0.738591 |
| H  | -2.901171 | 3.362260  | -0.945320 |
| H  | -2.260394 | 2.093228  | -2.045934 |

Imaginary frequency: -184.9525 cm-1

Cartesian coordinates

| ATOM | X         | Y         | Z         |
|------|-----------|-----------|-----------|
| N    | 1.040645  | -1.822024 | 0.242175  |
| C    | 0.673664  | -3.233897 | 0.482048  |
| H    | 1.194083  | -3.888023 | -0.223228 |
| C    | -0.847370 | -3.222038 | 0.277355  |
| N    | -1.149339 | -1.777771 | 0.157497  |
| H    | -1.394097 | -3.655202 | 1.119445  |
| C    | 2.429510  | -1.436591 | 0.197254  |
| C    | -2.522970 | -1.364109 | 0.040972  |
| C    | -5.242086 | -0.703262 | -0.166640 |
| C    | -3.273698 | -1.160277 | 1.215285  |
| C    | -3.118124 | -1.291872 | -1.233739 |
| C    | -4.472924 | -0.948120 | -1.308390 |
| C    | -4.626239 | -0.825837 | 1.083128  |
| C    | -2.658391 | -1.299768 | 2.586617  |
| C    | -2.344076 | -1.589561 | -2.495206 |
| H    | -4.939802 | -0.884730 | -2.288977 |
| H    | -5.212602 | -0.662122 | 1.984775  |
| C    | -6.696878 | -0.309561 | -0.279854 |
| C    | 5.154574  | -0.769187 | 0.097220  |
| C    | 3.119458  | -1.527562 | -1.030554 |
| C    | 3.102596  | -1.104953 | 1.391254  |
| C    | 4.456940  | -0.759203 | 1.307751  |
| C    | 4.472648  | -1.176574 | -1.054017 |
| C    | 2.448017  | -2.017529 | -2.290081 |
| C    | 2.426622  | -1.157283 | 2.740083  |
| H    | 4.981405  | -0.491009 | 2.222241  |
| H    | 5.008548  | -1.233610 | -1.998972 |
| C    | 6.607545  | -0.359795 | 0.032207  |
| H    | -2.284818 | -2.316934 | 2.763664  |
| H    | -1.817079 | -0.610943 | 2.717562  |
| H    | -1.917979 | -2.601024 | -2.479671 |
| H    | -1.514338 | -0.888961 | -2.639441 |
| H    | -7.154800 | -0.722821 | -1.184795 |
| H    | -6.809884 | 0.781777  | -0.327968 |
| H    | -7.274599 | -0.656915 | 0.583390  |
| H    | 2.045598  | -2.163367 | 2.958716  |
| H    | 1.583705  | -0.462381 | 2.804387  |
| H    | 3.170218  | -2.067547 | -3.110518 |
| H    | 1.635746  | -1.349668 | -2.591930 |
| H    | 7.156559  | -0.946144 | -0.712752 |
| H    | 7.104339  | -0.486908 | 0.999751  |
| H    | 6.707765  | 0.696671  | -0.250098 |
| C    | -0.036461 | -1.017025 | 0.102716  |
| Ru   | 0.099514  | 1.054829  | -0.108809 |
| Cl   | -0.107633 | 1.305938  | 2.346345  |
| Cl   | 0.380057  | 0.837617  | -2.559420 |
| C    | -1.446746 | 2.043103  | -0.505811 |
| H    | 3.139122  | -0.901038 | 3.530100  |
| H    | 2.028667  | -3.023587 | -2.160424 |
| H    | -3.000385 | -1.525543 | -3.368504 |
| H    | -3.401032 | -1.086516 | 3.361490  |
| H    | -1.155984 | -3.744572 | -0.635173 |
| H    | 0.959992  | -3.529358 | 1.497573  |
| C    | 0.233522  | 3.417654  | -0.404620 |
| C    | 1.440413  | 2.740811  | -0.026738 |
| H    | -1.647257 | 2.164269  | -1.576097 |
| H    | 0.147335  | 3.635011  | -1.468646 |
| C    | -2.591348 | 2.426542  | 0.378544  |
| H    | -3.063642 | 3.356609  | 0.032875  |
| H    | -3.345520 | 1.633225  | 0.273129  |
| H    | -2.326521 | 2.499779  | 1.432922  |
| C    | -0.336430 | 4.455664  | 0.543833  |
| H    | -1.324022 | 4.812183  | 0.240910  |
| H    | -0.392067 | 4.066883  | 1.564021  |
| H    | 0.338482  | 5.322099  | 0.547402  |
| C    | 2.640573  | 2.626763  | -0.940657 |
| H    | 3.279005  | 3.510870  | -0.786642 |
| H    | 3.246014  | 1.746623  | -0.697904 |
| H    | 2.356212  | 2.568690  | -1.991742 |

#### TS40

|                              |                     |
|------------------------------|---------------------|
| B3LYP SCF energy:            | -2175.58716842 a.u. |
| B3LYP enthalpy:              | -2174.954893 a.u.   |
| B3LYP free energy:           | -2175.063588 a.u.   |
| M06 SCF energy in solution:  | -2176.03520093 a.u. |
| M06 enthalpy in solution:    | -2175.402926 a.u.   |
| M06 free energy in solution: | -2175.511621 a.u.   |

H 1.690605 2.830699 1.031549

H -2.079268 3.276662 -1.855586  
H -0.309064 3.407558 -2.008924  
H -1.274959 2.566420 -3.256194

41

B3LYP SCF energy: -1325.79426306 a.u.  
B3LYP enthalpy: -1325.241358 a.u.  
B3LYP free energy: -1325.341001 a.u.  
M06 SCF energy in solution: -1326.24801714 a.u.  
M06 enthalpy in solution: -1325.695112 a.u.  
M06 free energy in solution: -1325.794755 a.u.

Cartesian coordinates

| ATOM | X         | Y         | Z         |
|------|-----------|-----------|-----------|
| Ru   | 0.404764  | 0.988373  | -0.416466 |
| O    | 0.575464  | 1.975046  | 1.529907  |
| O    | 1.273405  | 3.151255  | -0.208654 |
| N    | 0.868443  | -1.799082 | 0.085292  |
| N    | -1.316559 | -1.565928 | -0.056917 |
| C    | -0.139819 | -0.877414 | -0.084954 |
| C    | 0.379041  | -3.179444 | -0.054929 |
| C    | -1.112214 | -2.998415 | 0.238986  |
| C    | 2.245232  | -1.423991 | -0.042969 |
| C    | 3.202233  | -1.918117 | 0.862066  |
| C    | 4.529516  | -1.494601 | 0.721714  |
| C    | 4.920406  | -0.572152 | -0.253366 |
| C    | 3.940414  | -0.067130 | -1.111481 |
| C    | 2.604304  | -0.488835 | -1.048744 |
| C    | 2.836993  | -2.835906 | 2.006141  |
| C    | 6.362511  | -0.138486 | -0.381078 |
| C    | 1.555265  | 0.089822  | -1.938924 |
| C    | -2.627417 | -1.007810 | 0.118868  |
| C    | -3.575489 | -1.180015 | -0.909613 |
| C    | -4.863437 | -0.671820 | -0.721981 |
| C    | -5.231741 | -0.010127 | 0.454301  |
| C    | -4.269931 | 0.134272  | 1.457327  |
| C    | -2.966515 | -0.359073 | 1.321490  |
| C    | -3.217983 | -1.874972 | -2.203330 |
| C    | -6.639190 | 0.507007  | 0.643382  |
| C    | -1.974028 | -0.176896 | 2.445924  |
| C    | -1.038638 | 1.440844  | -1.448345 |
| C    | 1.088541  | 3.046927  | 1.033132  |
| C    | 1.468946  | 4.163160  | 1.981008  |
| H    | 0.862783  | -3.865761 | 0.641376  |
| H    | 0.556649  | -3.540501 | -1.078009 |
| H    | -1.750754 | -3.627499 | -0.386096 |
| H    | -1.353733 | -3.200967 | 1.291969  |
| H    | 5.271513  | -1.873085 | 1.422083  |
| H    | 4.213215  | 0.665311  | -1.868093 |
| H    | 1.869261  | -2.564189 | 2.441804  |
| H    | 3.590949  | -2.776088 | 2.796958  |
| H    | 2.779316  | -3.889537 | 1.699318  |
| H    | 6.884267  | -0.712648 | -1.158736 |
| H    | 6.910005  | -0.286470 | 0.555845  |
| H    | 6.438995  | 0.919511  | -0.654639 |
| H    | 1.013761  | -0.679252 | -2.499453 |
| H    | 1.966660  | 0.826161  | -2.635784 |
| H    | -5.594491 | -0.789518 | -1.519490 |
| H    | -4.538664 | 0.642328  | 2.381215  |
| H    | -2.242406 | -1.549154 | -2.578876 |
| H    | -3.968700 | -1.668406 | -2.972211 |
| H    | -3.170629 | -2.966039 | -2.084413 |
| H    | -7.311545 | -0.287988 | 0.993312  |
| H    | -7.054505 | 0.890863  | -0.295018 |
| H    | -6.673688 | 1.312823  | 1.383732  |
| H    | -1.269470 | 0.637288  | 2.239563  |
| H    | -1.374970 | -1.079257 | 2.612748  |
| H    | -2.496884 | 0.054627  | 3.379491  |
| H    | -1.906236 | 0.782652  | -1.575082 |
| H    | 0.600598  | 4.448373  | 2.584360  |
| H    | 2.241978  | 3.809089  | 2.672135  |
| H    | 1.839620  | 5.028816  | 1.428777  |
| C    | -1.165893 | 2.750526  | -2.175001 |

46

B3LYP SCF energy: -1325.78815128 a.u.  
B3LYP enthalpy: -1325.235781 a.u.  
B3LYP free energy: -1325.337660 a.u.  
M06 SCF energy in solution: -1326.24510729 a.u.  
M06 enthalpy in solution: -1325.692737 a.u.  
M06 free energy in solution: -1325.794616 a.u.

Cartesian coordinates

| ATOM | X         | Y         | Z         |
|------|-----------|-----------|-----------|
| Ru   | 0.062284  | 1.160862  | -0.063066 |
| O    | -2.062711 | 1.752807  | 0.070926  |
| O    | -0.589998 | 3.354944  | -0.330253 |
| N    | 1.370486  | -1.550426 | -0.078380 |
| N    | -0.821168 | -1.687783 | -0.242492 |
| C    | 0.208177  | -0.816528 | -0.051334 |
| C    | 1.120775  | -2.916872 | -0.588281 |
| C    | -0.375571 | -3.086875 | -0.330727 |
| C    | 2.685863  | -0.986409 | -0.160022 |
| C    | 3.764886  | -1.626146 | 0.477078  |
| C    | 5.045057  | -1.068389 | 0.346987  |
| C    | 5.271457  | 0.112309  | -0.359810 |
| C    | 4.167029  | 0.757165  | -0.927906 |
| C    | 2.870553  | 0.239630  | -0.841959 |
| C    | 3.596878  | -2.846553 | 1.356091  |
| C    | 6.662790  | 0.683900  | -0.505730 |
| C    | 1.705255  | 1.014752  | -1.365348 |
| C    | -2.221144 | -1.397388 | -0.100044 |
| C    | -3.006267 | -1.274891 | -1.258605 |
| C    | -4.380582 | -1.066535 | -1.111738 |
| C    | -4.982469 | -0.979133 | 0.146567  |
| C    | -4.169422 | -1.096124 | 1.277865  |
| C    | -2.791139 | -1.304729 | 1.181488  |
| C    | -2.387903 | -1.340005 | -2.635699 |
| C    | -6.475095 | -0.784828 | 0.282780  |
| C    | -1.945680 | -1.389262 | 2.429976  |
| C    | 1.045520  | 1.364964  | 1.463910  |
| C    | -1.786546 | 2.986235  | -0.151962 |
| C    | -2.921421 | 3.986334  | -0.186884 |
| H    | 1.721335  | -3.668199 | -0.077868 |
| H    | 1.361471  | -2.952007 | -1.660049 |
| H    | -0.893889 | -3.617774 | -1.134000 |
| H    | -0.578272 | -3.612294 | 0.613249  |
| H    | 5.879420  | -1.564134 | 0.839453  |
| H    | 4.309747  | 1.699745  | -1.452822 |
| H    | 2.638533  | -2.832789 | 1.886501  |
| H    | 4.393213  | -2.880073 | 2.106371  |
| H    | 3.653874  | -3.788929 | 0.793777  |
| H    | 7.075087  | 0.480110  | -1.503206 |
| H    | 7.352406  | 0.252673  | 0.227657  |
| H    | 6.665779  | 1.772059  | -0.374067 |
| H    | 1.248797  | 0.515713  | -2.241400 |
| H    | 2.019975  | 2.017122  | -1.676909 |
| H    | -4.993925 | -0.963117 | -2.004506 |
| H    | -4.617939 | -1.016531 | 2.266128  |
| H    | -1.608441 | -0.579371 | -2.761269 |
| H    | -3.145700 | -1.174761 | -3.407423 |
| H    | -1.919439 | -2.311972 | -2.836844 |
| H    | -6.993769 | -1.745958 | 0.401433  |
| H    | -6.897232 | -0.294283 | -0.600589 |
| H    | -6.720607 | -0.174365 | 1.158548  |
| H    | -1.299225 | -0.508533 | 2.521300  |
| H    | -1.292311 | -2.269826 | 2.432645  |
| H    | -2.577649 | -1.439875 | 3.321901  |
| H    | -2.561839 | 4.969382  | -0.497002 |
| H    | -3.371511 | 4.060014  | 0.809729  |
| H    | -3.702617 | 3.637511  | -0.869949 |

|   |          |          |          |
|---|----------|----------|----------|
| H | 1.341594 | 0.504254 | 2.081756 |
| C | 1.504385 | 2.692067 | 1.995057 |
| H | 1.158472 | 2.836849 | 3.030358 |
| H | 2.605597 | 2.709127 | 2.027001 |
| H | 1.152681 | 3.527623 | 1.385237 |

**TS42**

B3LYP SCF energy: -1482.99299768 a.u.  
 B3LYP enthalpy: -1482.323242 a.u.  
 B3LYP free energy: -1482.433442 a.u.  
 M06 SCF energy in solution: -1483.38650292 a.u.  
 M06 enthalpy in solution: -1482.716747 a.u.  
 M06 free energy in solution: -1482.826947 a.u.  
 Imaginary frequency: -178.5623 cm-1

Cartesian coordinates

| ATOM | X         | Y         | Z         |
|------|-----------|-----------|-----------|
| Ru   | -0.412671 | -0.691257 | 0.051125  |
| O    | -1.378423 | -3.333067 | -1.937669 |
| O    | -1.740740 | -2.418872 | 0.098002  |
| N    | -0.495372 | 2.183417  | -0.232089 |
| N    | 1.636445  | 1.694651  | -0.361662 |
| C    | 0.411984  | 1.153566  | -0.126217 |
| C    | 0.095290  | 3.393918  | -0.831009 |
| C    | 1.589332  | 3.152614  | -0.597566 |
| C    | -1.897935 | 1.904053  | -0.328629 |
| C    | -2.830693 | 2.691965  | 0.366684  |
| C    | -4.185378 | 2.352208  | 0.267969  |
| C    | -4.624760 | 1.246697  | -0.470547 |
| C    | -3.671670 | 0.469659  | -1.132007 |
| C    | -2.303686 | 0.787624  | -1.106399 |
| C    | -2.410107 | 3.853213  | 1.237789  |
| C    | -6.095714 | 0.911100  | -0.561926 |
| C    | -1.280234 | -0.062627 | -1.771829 |
| C    | 2.915063  | 1.048831  | -0.286618 |
| C    | 3.447722  | 0.454388  | -1.446836 |
| C    | 4.714261  | -0.131550 | -1.369085 |
| C    | 5.458722  | -0.135770 | -0.183998 |
| C    | 4.901777  | 0.467300  | 0.947222  |
| C    | 3.638634  | 1.070125  | 0.919389  |
| C    | 2.664132  | 0.413434  | -2.736885 |
| C    | 6.835555  | -0.756913 | -0.138687 |
| C    | 3.078042  | 1.708564  | 2.169808  |
| C    | 1.193951  | -1.676146 | 0.204510  |
| C    | -2.005433 | -3.234310 | -0.876624 |
| H    | -0.264103 | 4.305722  | -0.349566 |
| H    | -0.155242 | 3.443902  | -1.899623 |
| H    | 2.210609  | 3.424902  | -1.455581 |
| H    | 1.962944  | 3.693843  | 0.281312  |
| H    | -4.913978 | 2.954340  | 0.807356  |
| H    | -3.985842 | -0.401278 | -1.701775 |
| H    | -1.471775 | 3.640886  | 1.761784  |
| H    | -3.177102 | 4.068834  | 1.988132  |
| H    | -2.261750 | 4.774930  | 0.658248  |
| H    | -6.543720 | 1.330648  | -1.472815 |
| H    | -6.652977 | 1.313555  | 0.290744  |
| H    | -6.256264 | -0.171892 | -0.592079 |
| H    | -0.601375 | 0.508658  | -2.414008 |
| H    | -1.692935 | -0.918135 | -2.304528 |
| H    | 5.128051  | -0.601308 | -2.259015 |
| H    | 5.462063  | 0.469087  | 1.879879  |
| H    | 1.767843  | -0.208472 | -2.633081 |
| H    | 3.273172  | 0.000777  | -3.546564 |
| H    | 2.327979  | 1.410994  | -3.044140 |
| H    | 7.588244  | -0.084364 | -0.571194 |
| H    | 6.872211  | -1.691219 | -0.709707 |
| H    | 7.143276  | -0.975426 | 0.888901  |
| H    | 2.038664  | 1.413460  | 2.346895  |
| H    | 3.095951  | 2.804874  | 2.111621  |
| H    | 3.666862  | 1.422686  | 3.046546  |
| H    | 2.131191  | -1.180004 | 0.466920  |

|   |           |           |           |
|---|-----------|-----------|-----------|
| C | -0.707432 | -0.428885 | 2.191805  |
| C | 0.298849  | -1.447558 | 2.243015  |
| H | -0.364336 | 0.574642  | 2.445671  |
| H | 1.290529  | -1.097667 | 2.523427  |
| C | -3.214510 | -4.138005 | -0.606102 |
| H | -4.109625 | -3.527931 | -0.436308 |
| H | -3.386001 | -4.812063 | -1.448384 |
| H | -3.051280 | -4.725502 | 0.305149  |
| C | -0.030382 | -2.860975 | 2.665264  |
| H | -0.822773 | -3.278038 | 2.039691  |
| H | 0.845705  | -3.513101 | 2.608702  |
| H | -0.374921 | -2.862487 | 3.709602  |
| C | -2.145596 | -0.697781 | 2.596104  |
| H | -2.787268 | 0.141721  | 2.308882  |
| H | -2.533306 | -1.600744 | 2.122899  |
| H | -2.214387 | -0.808388 | 3.689746  |
| C | 1.401554  | -3.104421 | -0.208771 |
| H | 0.505023  | -3.577727 | -0.606961 |
| H | 2.163443  | -3.099210 | -1.003554 |
| H | 1.822458  | -3.705089 | 0.611912  |

**TS45**

B3LYP SCF energy: -1482.99960790 a.u.  
 B3LYP enthalpy: -1482.329438 a.u.  
 B3LYP free energy: -1482.437286 a.u.  
 M06 SCF energy in solution: -1483.38857176 a.u.  
 M06 enthalpy in solution: -1482.718402 a.u.  
 M06 free energy in solution: -1482.826250 a.u.  
 Imaginary frequency: -240.8078 cm-1

Cartesian coordinates

| ATOM | X         | Y         | Z         |
|------|-----------|-----------|-----------|
| O    | -0.749536 | 2.163225  | -1.611841 |
| O    | 0.647076  | 3.093254  | -0.168459 |
| C    | 1.312564  | 0.685576  | 1.753213  |
| C    | -0.094326 | 3.164542  | -1.205126 |
| H    | 1.337679  | -0.241951 | 2.340476  |
| C    | -1.540528 | 1.313101  | 1.294544  |
| C    | -0.565804 | 1.398294  | 2.354956  |
| H    | -2.105701 | 0.389109  | 1.274608  |
| H    | -0.585438 | 0.550442  | 3.038426  |
| C    | -0.157425 | 4.473510  | -1.971213 |
| H    | -1.123157 | 4.578544  | -2.472432 |
| H    | 0.625288  | 4.479410  | -2.739874 |
| H    | 0.019554  | 5.321094  | -1.303725 |
| Ru   | 0.302214  | 0.895986  | 0.153362  |
| C    | 0.043803  | -1.104010 | -0.041831 |
| C    | 1.531192  | 0.498165  | -1.545720 |
| N    | 1.130630  | -1.944317 | -0.166569 |
| N    | -1.058494 | -1.864891 | -0.303138 |
| C    | 2.693543  | -0.272385 | -1.020730 |
| H    | 0.945200  | -0.070472 | -2.277738 |
| H    | 1.846094  | 1.438935  | -2.004650 |
| C    | 0.768696  | -3.228694 | -0.798998 |
| C    | 2.477344  | -1.471681 | -0.300769 |
| C    | -0.739701 | -3.279897 | -0.572137 |
| C    | -2.443153 | -1.485711 | -0.285974 |
| C    | 4.007828  | 0.192231  | -1.139207 |
| H    | 1.292142  | -4.070384 | -0.343276 |
| H    | 1.028639  | -3.198590 | -1.866217 |
| C    | 3.536653  | -2.166541 | 0.298759  |
| H    | -1.297107 | -3.640149 | -1.441542 |
| H    | -1.007591 | -3.904316 | -0.290135 |
| C    | -3.019396 | -0.918361 | -1.439073 |
| C    | -3.226451 | -1.786988 | 0.845885  |
| C    | 5.095020  | -0.498589 | -0.585822 |
| H    | 4.181616  | 1.118681  | -1.682813 |
| C    | 4.839175  | -1.668270 | 0.129990  |
| C    | 3.322335  | -3.395585 | 1.153315  |
| C    | -4.388542 | -0.629047 | -1.417099 |
| C    | -2.206974 | -0.615307 | -2.674747 |

|   |           |           |           |
|---|-----------|-----------|-----------|
| C | -4.590008 | -1.477917 | 0.816672  |
| C | -2.625973 | -2.417086 | 2.082625  |
| C | 6.505676  | 0.013362  | -0.767308 |
| H | 5.666111  | -2.203700 | 0.592424  |
| H | 2.379952  | -3.338690 | 1.708939  |
| H | 4.136063  | -3.503169 | 1.877735  |
| H | 3.301278  | -4.320647 | 0.560284  |
| C | -5.189683 | -0.892660 | -0.302318 |
| H | -4.840199 | -0.188814 | -2.303789 |
| H | -1.657951 | 0.325992  | -2.559176 |
| H | -2.861876 | -0.521943 | -3.547175 |
| H | -1.473517 | -1.401685 | -2.883758 |
| H | -5.196250 | -1.697696 | 1.693275  |
| H | -1.620180 | -2.035304 | 2.284624  |
| H | -2.546272 | -3.508460 | 1.987002  |
| H | -3.249685 | -2.217314 | 2.959436  |
| H | 6.863462  | -0.158478 | -1.791346 |
| H | 7.204027  | -0.485747 | -0.087306 |
| H | 6.567855  | 1.092454  | -0.583811 |
| C | -6.658196 | -0.536031 | -0.301619 |
| H | -6.809736 | 0.515560  | -0.023965 |
| H | -7.219710 | -1.146516 | 0.413388  |
| H | -7.104935 | -0.675463 | -1.292144 |
| C | -2.374926 | 2.508998  | 0.891537  |
| H | -2.836476 | 2.342706  | -0.084205 |
| H | -3.180911 | 2.656278  | 1.627923  |
| H | -1.795414 | 3.432472  | 0.843076  |
| C | -0.285141 | 2.738590  | 3.007806  |
| H | 0.469852  | 2.659815  | 3.794556  |
| H | 0.053558  | 3.472733  | 2.272539  |
| H | -1.206079 | 3.120529  | 3.469653  |
| C | 2.412817  | 1.636030  | 2.137287  |
| H | 2.508524  | 1.771942  | 3.223799  |
| H | 3.351131  | 1.177695  | 1.788489  |
| H | 2.314923  | 2.608513  | 1.649171  |

#### 47

B3LYP SCF energy: -1418.13051205 a.u.  
 B3LYP enthalpy: -1417.556611 a.u.  
 B3LYP free energy: -1417.648604 a.u.  
 M06 SCF energy in solution: -1418.59410000 a.u.  
 M06 enthalpy in solution: -1418.020199 a.u.  
 M06 free energy in solution: -1418.112192 a.u.

#### Cartesian coordinates

| ATOM | X         | Y         | Z         |
|------|-----------|-----------|-----------|
| Ru   | -0.231927 | 1.041275  | 0.260103  |
| O    | 1.396355  | 2.326795  | -0.471499 |
| O    | -0.317540 | 3.329972  | 0.420464  |
| N    | -0.975475 | -1.593198 | -0.661092 |
| N    | 1.196050  | -1.637910 | -0.308484 |
| C    | 0.090133  | -0.854024 | -0.251443 |
| C    | -0.640014 | -3.009845 | -0.839176 |
| H    | -1.088123 | -3.422339 | -1.747790 |
| H    | -0.989027 | -3.603982 | 0.016739  |
| C    | 0.897295  | -2.956827 | -0.906173 |
| H    | 1.380941  | -3.762106 | -0.346686 |
| H    | 1.265226  | -2.990515 | -1.940316 |
| C    | -2.313032 | -1.057517 | -0.379728 |
| C    | -2.827487 | -1.569396 | 0.989158  |
| H    | -2.081053 | -1.340865 | 1.757526  |
| H    | -2.950630 | -2.661367 | 0.957648  |
| C    | -4.170308 | -0.897543 | 1.334925  |
| H    | -4.523406 | -1.273750 | 2.304382  |
| C    | -5.203290 | -1.232932 | 0.240593  |
| H    | -5.373038 | -2.318293 | 0.199030  |
| H    | -6.169645 | -0.767398 | 0.477066  |
| C    | -4.692800 | -0.718561 | -1.121305 |
| H    | -5.425668 | -0.955393 | -1.903717 |
| C    | -3.352318 | -1.415141 | -1.466196 |
| H    | -2.985903 | -1.085028 | -2.447308 |

|   |           |           |           |
|---|-----------|-----------|-----------|
| H | -3.506025 | -2.503244 | -1.523464 |
| C | -4.499830 | 0.812020  | -1.037312 |
| H | -4.175416 | 1.210144  | -2.008192 |
| H | -5.460268 | 1.291477  | -0.800946 |
| C | -3.448343 | 1.149890  | 0.054025  |
| H | -3.304920 | 2.236332  | 0.101754  |
| C | -2.129627 | 0.474307  | -0.349190 |
| H | -1.903362 | 0.790823  | -1.395321 |
| C | -3.957631 | 0.627811  | 1.412119  |
| H | -3.236813 | 0.868455  | 2.202208  |
| H | -4.901841 | 1.126112  | 1.671751  |
| C | 2.556854  | -1.199672 | -0.160694 |
| C | 3.252701  | -1.549323 | 1.012512  |
| C | 4.589205  | -1.161151 | 1.135102  |
| H | 5.131077  | -1.425830 | 2.040713  |
| C | 5.245101  | -0.443101 | 0.129719  |
| C | 4.530650  | -0.128114 | -1.028408 |
| H | 5.025841  | 0.421301  | -1.826355 |
| C | 3.190626  | -0.492877 | -1.199167 |
| C | 2.584059  | -2.318892 | 2.127666  |
| H | 3.284747  | -2.491758 | 2.950011  |
| H | 2.217246  | -3.298032 | 1.795275  |
| H | 1.721700  | -1.774597 | 2.527969  |
| C | 6.680088  | -0.001640 | 0.300025  |
| H | 6.732288  | 1.017920  | 0.704205  |
| H | 7.215065  | 0.001709  | -0.655849 |
| H | 7.222428  | -0.655269 | 0.991447  |
| C | 2.468855  | -0.098158 | -2.466361 |
| H | 1.714286  | -0.831607 | -2.766997 |
| H | 3.178100  | 0.015253  | -3.292571 |
| H | 1.961408  | 0.863841  | -2.330020 |
| C | -0.246522 | 0.638564  | 2.048045  |
| H | 0.020467  | -0.355705 | 2.433201  |
| O | 1.349556  | 4.522392  | -0.366078 |
| N | 0.824119  | 3.453280  | -0.141964 |
| C | -0.520952 | 1.646367  | 3.130997  |
| H | -1.326302 | 1.288653  | 3.791720  |
| H | 0.370895  | 1.768873  | 3.765202  |
| H | -0.796917 | 2.627706  | 2.736772  |

#### TS48

B3LYP SCF energy: -1575.33621703 a.u.  
 B3LYP enthalpy: -1574.644401 a.u.  
 B3LYP free energy: -1574.744989 a.u.  
 M06 SCF energy in solution: -1575.73592476 a.u.  
 M06 enthalpy in solution: -1575.044109 a.u.  
 M06 free energy in solution: -1575.144697 a.u.  
 Imaginary frequency: -230.6816 cm<sup>-1</sup>

#### Cartesian coordinates

| ATOM | X         | Y         | Z         |
|------|-----------|-----------|-----------|
| Ru   | -0.370126 | 0.817258  | 0.126153  |
| O    | -1.385690 | 2.790533  | 0.129317  |
| O    | -0.968640 | 2.096414  | -1.888411 |
| N    | -0.689752 | -2.051467 | -0.186845 |
| N    | 1.469255  | -1.805858 | 0.072307  |
| C    | 0.284819  | -1.119917 | -0.039799 |
| C    | -0.232750 | -3.427913 | 0.011639  |
| H    | -0.646793 | -4.103479 | -0.742086 |
| H    | -0.531762 | -3.796838 | 1.002533  |
| C    | 1.285916  | -3.265055 | -0.104826 |
| H    | 1.839720  | -3.821828 | 0.656197  |
| H    | 1.660837  | -3.572049 | -1.090011 |
| C    | -2.093885 | -1.634255 | -0.144454 |
| C    | -2.664173 | -1.749137 | 1.290991  |
| H    | -2.016874 | -1.195681 | 1.979751  |
| H    | -2.666056 | -2.801025 | 1.612680  |
| C    | -4.098692 | -1.187090 | 1.328576  |
| H    | -4.491572 | -1.265336 | 2.351449  |
| C    | -4.986111 | -2.005831 | 0.369024  |
| H    | -5.024010 | -3.056509 | 0.691396  |

|   |           |           |           |   |           |           |           |
|---|-----------|-----------|-----------|---|-----------|-----------|-----------|
| H | -6.016888 | -1.627245 | 0.391702  | N | -0.463746 | -2.170188 | 0.056308  |
| C | -4.420955 | -1.905714 | -1.062934 | N | 1.674336  | -1.749368 | 0.280005  |
| H | -5.047987 | -2.490993 | -1.748664 | C | 0.444989  | -1.168147 | 0.083309  |
| C | -2.983861 | -2.478542 | -1.088504 | C | 0.081217  | -3.472377 | 0.444971  |
| H | -2.573222 | -2.443641 | -2.106263 | H | -0.288707 | -4.274472 | -0.199055 |
| H | -3.004746 | -3.534041 | -0.777001 | H | -0.189852 | -3.713515 | 1.482495  |
| C | -4.412295 | -0.424483 | -1.498324 | C | 1.587499  | -3.227857 | 0.287764  |
| H | -4.048489 | -0.330832 | -2.530041 | H | 2.181928  | -3.645441 | 1.105560  |
| H | -5.438837 | -0.030822 | -1.484054 | H | 1.972750  | -3.634508 | -0.656103 |
| C | -3.508647 | 0.400077  | -0.543720 | C | -1.888641 | -1.826636 | -0.001877 |
| H | -3.521022 | 1.446717  | -0.861662 | C | -2.475762 | -1.655692 | 1.424455  |
| C | -2.083191 | -0.176049 | -0.638396 | H | -1.878778 | -0.916746 | 1.978183  |
| H | -1.803309 | -0.203179 | -1.701575 | H | -2.405145 | -2.604752 | 1.976561  |
| C | -4.073379 | 0.291398  | 0.887146  | C | -3.944396 | -1.194770 | 1.338937  |
| H | -3.464629 | 0.886506  | 1.577428  | H | -4.346546 | -1.082128 | 2.354634  |
| H | -5.090685 | 0.705877  | 0.919095  | C | -4.760404 | -2.255180 | 0.571788  |
| C | 2.803038  | -1.309173 | -0.110792 | H | -4.739608 | -3.214975 | 1.108369  |
| C | 3.686156  | -1.299163 | 0.984378  | H | -5.812215 | -1.945749 | 0.509975  |
| C | 5.008091  | -0.888286 | 0.773421  | C | -4.178816 | -2.424333 | -0.847254 |
| H | 5.691744  | -0.870903 | 1.619768  | H | -4.758758 | -3.178524 | -1.395888 |
| C | 5.473670  | -0.510962 | -0.488294 | C | -2.711626 | -2.901630 | -0.745576 |
| C | 4.578549  | -0.560503 | -1.563354 | H | -2.287979 | -3.060136 | -1.746438 |
| H | 4.925191  | -0.284516 | -2.557088 | H | -2.675856 | -3.865857 | -0.215310 |
| C | 3.248215  | -0.958082 | -1.403788 | C | -4.241036 | -1.072059 | -1.587565 |
| C | 3.250485  | -1.749918 | 2.359910  | H | -3.857110 | -1.182304 | -2.611117 |
| H | 3.935144  | -1.374819 | 3.126874  | H | -5.287082 | -0.745158 | -1.673257 |
| H | 3.245784  | -2.845703 | 2.439627  | C | -3.412155 | -0.007562 | -0.822239 |
| H | 2.239616  | -1.409416 | 2.600782  | H | -3.464566 | 0.940863  | -1.361060 |
| C | 6.898067  | -0.048241 | -0.688346 | C | -1.948358 | -0.484945 | -0.770195 |
| H | 7.296965  | -0.385121 | -1.651469 | H | -1.614641 | -0.684892 | -1.799803 |
| H | 7.556492  | -0.423288 | 0.101925  | C | -4.004610 | 0.154323  | 0.593906  |
| H | 6.963832  | 1.047738  | -0.676975 | H | -3.455354 | 0.924001  | 1.148462  |
| C | 2.318113  | -0.982737 | -2.595390 | H | -5.046466 | 0.495883  | 0.527163  |
| H | 1.542792  | -0.211252 | -2.517685 | C | 2.963377  | -1.165328 | 0.032460  |
| H | 1.798354  | -1.942470 | -2.694797 | C | 3.806376  | -0.851194 | 1.113992  |
| H | 2.875103  | -0.807863 | -3.520519 | C | 5.073158  | -0.314054 | 0.843449  |
| C | -0.126621 | 0.739911  | 2.013749  | H | 5.721412  | -0.061908 | 1.680601  |
| H | 0.440536  | -0.052095 | 2.519732  | C | 5.527532  | -0.103692 | -0.458365 |
| C | 1.569268  | 1.832640  | -0.166131 | C | 4.687266  | -0.476376 | -1.515419 |
| H | 2.216268  | 1.069477  | -0.580882 | H | 5.033802  | -0.349744 | -2.539161 |
| C | 1.509359  | 1.844849  | 1.274052  | C | 3.419001  | -1.019395 | -1.299322 |
| H | 2.163652  | 1.113939  | 1.744287  | C | 3.416347  | -1.100790 | 2.553971  |
| C | 1.416187  | 3.173895  | 2.000193  | H | 3.391729  | -0.165993 | 3.126451  |
| H | 1.393747  | 3.046294  | 3.085300  | H | 4.150153  | -1.754191 | 3.041574  |
| H | 2.299979  | 3.779946  | 1.758220  | H | 2.434236  | -1.570086 | 2.637341  |
| H | 0.531631  | 3.740584  | 1.698240  | C | 6.881523  | 0.510563  | -0.726401 |
| C | 1.606658  | 3.122412  | -0.957996 | H | 7.373495  | 0.038096  | -1.583808 |
| H | 2.613120  | 3.562653  | -0.875053 | H | 7.543571  | 0.415513  | 0.140184  |
| H | 1.409397  | 2.938617  | -2.016140 | H | 6.791761  | 1.580686  | -0.955207 |
| H | 0.894345  | 3.869778  | -0.603915 | C | 2.593301  | -1.473611 | -2.483831 |
| O | -2.058744 | 3.975447  | -1.587492 | H | 1.534317  | -1.223905 | -2.378427 |
| N | -1.490410 | 2.986837  | -1.146940 | H | 2.661409  | -2.561457 | -2.618735 |
| C | -0.935183 | 1.557492  | 2.991038  | H | 2.959902  | -1.013362 | -3.406381 |
| H | -1.703638 | 0.895856  | 3.417178  | C | 0.731475  | 1.314574  | 1.850967  |
| H | -0.335942 | 1.918560  | 3.838211  | H | 1.224432  | 0.399773  | 2.166432  |
| H | -1.442398 | 2.403583  | 2.521392  | C | 0.879253  | 1.373480  | -1.248289 |

#### TS51

B3LYP SCF energy: -1575.32385084 a.u.  
 B3LYP enthalpy: -1574.632942 a.u.  
 B3LYP free energy: -1574.736596 a.u.  
 M06 SCF energy in solution: -1575.72500829 a.u.  
 M06 enthalpy in solution: -1575.034099 a.u.  
 M06 free energy in solution: -1575.137753 a.u.  
 Imaginary frequency: -132.0763 cm<sup>-1</sup>

#### Cartesian coordinates

| ATOM | X         | Y        | Z         |
|------|-----------|----------|-----------|
| Ru   | -0.356557 | 0.712167 | -0.006794 |
| O    | -2.436106 | 2.971752 | -1.656452 |
| O    | -1.538149 | 2.529159 | 0.308493  |

|   |           |           |           |
|---|-----------|-----------|-----------|
| N | -0.463746 | -2.170188 | 0.056308  |
| N | 1.674336  | -1.749368 | 0.280005  |
| C | 0.444989  | -1.168147 | 0.083309  |
| C | 0.081217  | -3.472377 | 0.444971  |
| H | -0.288707 | -4.274472 | -0.199055 |
| H | -0.189852 | -3.713515 | 1.482495  |
| C | 1.587499  | -3.227857 | 0.287764  |
| H | 2.181928  | -3.645441 | 1.105560  |
| H | 1.972750  | -3.634508 | -0.656103 |
| C | -1.888641 | -1.826636 | -0.001877 |
| C | -2.475762 | -1.655692 | 1.424455  |
| H | -1.878778 | -0.916746 | 1.978183  |
| H | -2.405145 | -2.604752 | 1.976561  |
| C | -3.944396 | -1.194770 | 1.338937  |
| H | -4.346546 | -1.082128 | 2.354634  |
| C | -4.760404 | -2.255180 | 0.571788  |
| H | -4.739608 | -3.214975 | 1.108369  |
| H | -5.812215 | -1.945749 | 0.509975  |
| C | -4.178816 | -2.424333 | -0.847254 |
| H | -4.758758 | -3.178524 | -1.395888 |
| C | -2.711626 | -2.901630 | -0.745576 |
| H | -2.287979 | -3.060136 | -1.746438 |
| H | -2.675856 | -3.865857 | -0.215310 |
| C | -4.241036 | -1.072059 | -1.587565 |
| H | -3.857110 | -1.182304 | -2.611117 |
| H | -5.287082 | -0.745158 | -1.673257 |
| C | -3.412155 | -0.007562 | -0.822239 |
| H | -3.464566 | 0.940863  | -1.361060 |
| C | -1.948358 | -0.484945 | -0.770195 |
| H | -1.614641 | -0.684892 | -1.799803 |
| C | -4.004610 | 0.154323  | 0.593906  |
| H | -3.455354 | 0.924001  | 1.148462  |
| H | -5.046466 | 0.495883  | 0.527163  |
| C | 2.963377  | -1.165328 | 0.032460  |
| C | 3.806376  | -0.851194 | 1.113992  |
| C | 5.073158  | -0.314054 | 0.843449  |
| H | 5.721412  | -0.061908 | 1.680601  |
| C | 5.527532  | -0.103692 | -0.458365 |
| C | 4.687266  | -0.476376 | -1.515419 |
| H | 5.033802  | -0.349744 | -2.539161 |
| C | 3.419001  | -1.019395 | -1.299322 |
| C | 3.416347  | -1.100790 | 2.553971  |
| H | 3.391729  | -0.165993 | 3.126451  |
| H | 4.150153  | -1.754191 | 3.041574  |
| H | 2.434236  | -1.570086 | 2.637341  |
| C | 6.881523  | 0.510563  | -0.726401 |
| H | 7.373495  | 0.038096  | -1.583808 |
| H | 7.543571  | 0.415513  | 0.140184  |
| H | 6.791761  | 1.580686  | -0.955207 |
| C | 2.593301  | -1.473611 | -2.483831 |
| H | 1.534317  | -1.223905 | -2.378427 |
| H | 2.661409  | -2.561457 | -2.618735 |
| H | 2.959902  | -1.013362 | -3.406381 |
| C | 0.731475  | 1.314574  | 1.850967  |
| H | 1.224432  | 0.399773  | 2.166432  |
| C | 0.879253  | 1.373480  | -1.248289 |
| H | 1.843519  | 0.882863  | -1.403797 |
| C | 1.466692  | 2.111496  | 0.946693  |
| H | 2.429241  | 1.708968  | 0.642095  |
| C | -0.221581 | 1.885936  | 2.885138  |
| H | 0.355333  | 2.298986  | 3.726652  |
| H | -0.861708 | 2.668311  | 2.477401  |
| H | -0.866850 | 1.100198  | 3.295482  |
| C | 1.320834  | 3.609441  | 0.858590  |
| H | 1.787351  | 4.069733  | 1.742292  |
| H | 1.826323  | 4.014974  | -0.022503 |
| H | 0.272128  | 3.910836  | 0.831138  |
| O | -3.218758 | 3.894426  | 0.160466  |
| N | -2.432618 | 3.148807  | -0.424635 |
| C | 0.633048  | 2.499951  | -2.203431 |
| H | 1.438773  | 3.247537  | -2.137542 |
| H | 0.683501  | 2.088516  | -3.224525 |
| H | -0.340030 | 2.976460  | -2.077566 |

**Ts51'**

B3LYP SCF energy: -1575.33106604 a.u.  
 B3LYP enthalpy: -1574.639452 a.u.  
 B3LYP free energy: -1574.739869 a.u.  
 M06 SCF energy in solution: -1575.72768388 a.u.  
 M06 enthalpy in solution: -1575.036070 a.u.  
 M06 free energy in solution: -1575.136487 a.u.  
 Imaginary frequency: -222.8024 cm<sup>-1</sup>

## Cartesian coordinates

| ATOM | X         | Y         | Z         |
|------|-----------|-----------|-----------|
| Ru   | 0.302175  | 0.838066  | 0.240600  |
| O    | 1.682970  | 1.779911  | -1.460712 |
| O    | 1.324859  | 2.812916  | 0.415815  |
| N    | 0.741569  | -1.982720 | -0.280391 |
| N    | -1.420373 | -1.738717 | -0.526054 |
| C    | -0.261742 | -1.075249 | -0.190977 |
| C    | 0.336519  | -3.255700 | -0.881743 |
| H    | 0.759227  | -4.108510 | -0.343832 |
| H    | 0.668912  | -3.311599 | -1.927162 |
| C    | -1.189507 | -3.178532 | -0.769399 |
| H    | -1.706197 | -3.505915 | -1.676568 |
| H    | -1.571431 | -3.770638 | 0.072932  |
| C    | 2.137775  | -1.575457 | -0.087754 |
| C    | 2.859792  | -1.379763 | -1.445159 |
| H    | 2.315447  | -0.640620 | -2.042779 |
| H    | 2.866952  | -2.327181 | -2.004328 |
| C    | 4.309452  | -0.904665 | -1.205636 |
| H    | 4.811173  | -0.787145 | -2.175226 |
| C    | 5.065878  | -1.940352 | -0.351494 |
| H    | 5.116580  | -2.908418 | -0.871011 |
| H    | 6.100713  | -1.608528 | -0.191724 |
| C    | 4.346539  | -2.103123 | 1.002787  |
| H    | 4.884847  | -2.832238 | 1.623420  |
| C    | 2.916400  | -2.627260 | 0.741989  |
| H    | 2.387614  | -2.805936 | 1.688180  |
| H    | 2.974995  | -3.590402 | 0.212272  |
| C    | 4.295567  | -0.739690 | 1.730030  |
| H    | 3.816256  | -0.854351 | 2.712267  |
| H    | 5.319202  | -0.383149 | 1.913663  |
| C    | 3.515809  | 0.292189  | 0.866674  |
| H    | 3.486143  | 1.254830  | 1.390623  |
| C    | 2.080503  | -0.258415 | 0.705682  |
| H    | 1.745332  | -0.523964 | 1.721169  |
| C    | 4.280318  | 0.447156  | -0.467491 |
| H    | 3.826845  | 1.205563  | -1.105239 |
| H    | 5.308591  | 0.773856  | -0.256651 |
| C    | -2.772246 | -1.323644 | -0.287254 |
| C    | -3.568151 | -0.904835 | -1.371604 |
| C    | -4.891489 | -0.521386 | -1.123512 |
| H    | -5.501291 | -0.180412 | -1.957916 |
| C    | -5.450155 | -0.568712 | 0.155727  |
| C    | -4.655998 | -1.051861 | 1.201746  |
| H    | -5.083549 | -1.134377 | 2.199340  |
| C    | -3.330735 | -1.451661 | 1.004186  |
| C    | -3.054204 | -0.903442 | -2.794404 |
| H    | -3.405959 | -0.021260 | -3.339858 |
| H    | -3.424702 | -1.783696 | -3.337249 |
| H    | -1.963236 | -0.922962 | -2.838567 |
| C    | -6.867735 | -0.109790 | 0.406681  |
| H    | -6.890505 | 0.929063  | 0.761649  |
| H    | -7.358551 | -0.722746 | 1.170591  |
| H    | -7.471180 | -0.156050 | -0.505613 |
| C    | -2.571647 | -2.079199 | 2.154383  |
| H    | -1.491139 | -1.945482 | 2.071672  |
| H    | -2.768921 | -3.159156 | 2.199544  |
| H    | -2.894831 | -1.658064 | 3.111977  |
| C    | -1.284116 | 1.775468  | -1.010057 |
| H    | -1.711524 | 0.932112  | -1.540501 |
| C    | -0.743433 | 0.978412  | 1.820862  |

|   |           |          |           |
|---|-----------|----------|-----------|
| H | -1.558169 | 0.307264 | 2.103264  |
| C | -1.840179 | 2.016761 | 0.288665  |
| H | -2.665018 | 1.360928 | 0.554511  |
| C | -0.910384 | 2.918860 | -1.929521 |
| H | -1.829770 | 3.354237 | -2.352208 |
| H | -0.375050 | 3.724135 | -1.422151 |
| H | -0.292063 | 2.571010 | -2.759259 |
| C | -1.945974 | 3.433104 | 0.818361  |
| H | -2.612445 | 4.016490 | 0.167620  |
| H | -2.367630 | 3.459974 | 1.826643  |
| H | -0.975135 | 3.934884 | 0.835000  |
| O | 2.670924  | 3.698809 | -1.073679 |
| N | 1.923521  | 2.796702 | -0.727922 |
| C | -0.343550 | 1.890263 | 2.952223  |
| H | -1.204246 | 2.362078 | 3.446778  |
| H | 0.147074  | 1.261707 | 3.712628  |
| H | 0.368043  | 2.662959 | 2.650907  |

**52**

B3LYP SCF energy: -1979.03579316 a.u.  
 B3LYP enthalpy: -1978.551488 a.u.  
 B3LYP free energy: -1978.649665 a.u.  
 M06 SCF energy in solution: -1979.58117039 a.u.  
 M06 enthalpy in solution: -1979.096865 a.u.  
 M06 free energy in solution: -1979.195042 a.u.

## Cartesian coordinates

| ATOM | X         | Y         | Z         |
|------|-----------|-----------|-----------|
| C    | 3.163661  | 1.021805  | 0.969125  |
| C    | 2.396457  | -0.159366 | 0.921406  |
| C    | 2.994960  | -1.409336 | 0.657211  |
| C    | 4.351840  | -1.435114 | 0.327762  |
| C    | 5.124464  | -0.270579 | 0.276253  |
| C    | 4.517098  | 0.939149  | 0.620941  |
| N    | 1.003054  | -0.134422 | 1.291474  |
| C    | 0.631194  | -0.228385 | 2.715813  |
| C    | -0.881452 | -0.462876 | 2.649051  |
| N    | -1.194131 | -0.160668 | 1.237663  |
| C    | -0.079608 | -0.023478 | 0.473505  |
| C    | -2.568769 | -0.220780 | 0.829150  |
| C    | -3.357536 | 0.941938  | 0.916546  |
| C    | -4.707935 | 0.847519  | 0.568170  |
| C    | -5.284377 | -0.358222 | 0.151148  |
| C    | -4.470693 | -1.493180 | 0.084632  |
| C    | -3.112381 | -1.452686 | 0.422120  |
| Ru   | 0.107756  | 0.426227  | -1.444476 |
| Cl   | 1.083706  | -1.555657 | -2.303637 |
| C    | -2.765520 | 2.261897  | 1.349543  |
| C    | -6.751169 | -0.427011 | -0.205915 |
| C    | -2.259726 | -2.694457 | 0.299942  |
| C    | 2.220700  | -2.701619 | 0.762915  |
| C    | 6.576413  | -0.321234 | -0.136860 |
| C    | 2.601995  | 2.335648  | 1.458379  |
| Cl   | 0.207425  | 2.776786  | -1.100361 |
| C    | -1.566559 | 0.251972  | -2.101779 |
| H    | 1.172192  | -1.047188 | 3.197991  |
| H    | 0.887038  | 0.704226  | 3.231927  |
| H    | -1.446825 | 0.197984  | 3.311954  |
| H    | -1.159214 | -1.498258 | 2.881736  |
| H    | -2.478035 | -0.080486 | -1.608494 |
| H    | -1.658939 | 0.513966  | -3.169843 |
| H    | -5.324713 | 1.742153  | 0.622422  |
| H    | -4.900238 | -2.437965 | -0.240898 |
| H    | 4.816975  | -2.393296 | 0.107809  |
| H    | 5.112877  | 1.849120  | 0.636462  |
| H    | 3.280874  | 3.156712  | 1.209631  |
| H    | 1.630401  | 2.565719  | 1.018108  |
| H    | 2.491952  | 2.327859  | 2.552122  |
| H    | 2.889371  | -3.556804 | 0.627413  |
| H    | 1.741887  | -2.809219 | 1.744737  |
| H    | 1.441925  | -2.761377 | -0.001905 |

|   |           |           |           |
|---|-----------|-----------|-----------|
| H | 7.157534  | 0.477801  | 0.335897  |
| H | 7.035570  | -1.279975 | 0.126809  |
| H | 6.678097  | -0.199545 | -1.223317 |
| H | -2.867253 | -3.547016 | -0.017304 |
| H | -1.456538 | -2.560243 | -0.433996 |
| H | -1.784821 | -2.965062 | 1.250905  |
| H | -3.528946 | 3.045471  | 1.343903  |
| H | -2.354130 | 2.209571  | 2.365901  |
| H | -1.950074 | 2.571899  | 0.686780  |
| H | -7.014950 | -1.400654 | -0.630191 |
| H | -7.382586 | -0.266623 | 0.677336  |
| H | -7.020729 | 0.344044  | -0.937288 |

**TS53**

B3LYP SCF energy: -2136.26989020 a.u.  
 B3LYP enthalpy: -2135.667767 a.u.  
 B3LYP free energy: -2135.774037 a.u.  
 M06 SCF energy in solution: -2136.73685495 a.u.  
 M06 enthalpy in solution: -2136.134732 a.u.  
 M06 free energy in solution: -2136.241002 a.u.  
 Imaginary frequency: -207.2349 cm-1

Cartesian coordinates

| ATOM | X         | Y         | Z         |
|------|-----------|-----------|-----------|
| N    | 0.922005  | -1.810967 | 0.303030  |
| C    | 0.509894  | -3.187878 | 0.645999  |
| H    | 0.956748  | -3.904591 | -0.049333 |
| C    | -1.021316 | -3.116264 | 0.530718  |
| N    | -1.268610 | -1.676166 | 0.293126  |
| H    | -1.531582 | -3.442960 | 1.441374  |
| C    | 2.316964  | -1.459682 | 0.209008  |
| C    | -2.624808 | -1.204980 | 0.178569  |
| C    | -5.302273 | -0.392433 | -0.020376 |
| C    | -3.323841 | -0.844806 | 1.347424  |
| C    | -3.255776 | -1.217451 | -1.080452 |
| C    | -4.589226 | -0.798013 | -1.151919 |
| C    | -4.655500 | -0.436385 | 1.218487  |
| C    | -2.678045 | -0.895664 | 2.710746  |
| C    | -2.542541 | -1.674603 | -2.330126 |
| H    | -5.083621 | -0.799332 | -2.121039 |
| H    | -5.201573 | -0.151103 | 2.115231  |
| C    | -6.731420 | 0.085976  | -0.132066 |
| C    | 5.047036  | -0.835063 | 0.020916  |
| C    | 2.982829  | -1.633413 | -1.023388 |
| C    | 3.015101  | -1.063097 | 1.368729  |
| C    | 4.372156  | -0.742358 | 1.241338  |
| C    | 4.339519  | -1.301926 | -1.091237 |
| C    | 2.282914  | -2.190955 | -2.238775 |
| C    | 2.358448  | -1.013783 | 2.727280  |
| H    | 4.916781  | -0.427737 | 2.128877  |
| H    | 4.857622  | -1.423264 | -2.039998 |
| C    | 6.503146  | -0.448920 | -0.094200 |
| H    | -2.295298 | -1.897341 | 2.945055  |
| H    | -1.836695 | -0.197644 | 2.777933  |
| H    | -2.128149 | -2.684340 | -2.217357 |
| H    | -1.711449 | -1.009340 | -2.589406 |
| H    | -7.229743 | -0.339811 | -1.009354 |
| H    | -6.776436 | 1.178930  | -0.230155 |
| H    | -7.315231 | -0.182667 | 0.755105  |
| H    | 1.934467  | -1.987096 | 3.005264  |
| H    | 1.549667  | -0.277049 | 2.762741  |
| H    | 2.993360  | -2.315192 | -3.061583 |
| H    | 1.482851  | -1.526097 | -2.578349 |
| H    | 7.030197  | -1.082051 | -0.816286 |
| H    | 7.017494  | -0.529246 | 0.869173  |
| H    | 6.609871  | 0.589212  | -0.435918 |
| C    | -0.126819 | -0.975116 | 0.141501  |
| Ru   | 0.093226  | 1.044919  | -0.242199 |
| Cl   | -0.049573 | 1.551650  | 2.167294  |
| Cl   | 0.228979  | 0.674448  | -2.677464 |
| C    | -1.481483 | 1.972292  | -0.506050 |

|   |           |           |           |
|---|-----------|-----------|-----------|
| H | 3.093419  | -0.748162 | 3.493252  |
| H | 1.840652  | -3.174577 | -2.035088 |
| H | -3.236355 | -1.698775 | -3.176083 |
| H | -3.404301 | -0.633568 | 3.486230  |
| H | -1.409877 | -3.705526 | -0.307117 |
| H | 0.844781  | -3.440673 | 1.657985  |
| C | 0.169774  | 3.414985  | -0.776080 |
| C | 1.426979  | 2.762710  | -0.633067 |
| H | -1.960171 | 2.019933  | -1.487948 |
| H | -0.174192 | 3.494868  | -1.804901 |
| H | 1.869112  | 2.422099  | -1.567860 |
| C | 2.417781  | 3.077671  | 0.463211  |
| H | 3.093453  | 2.232044  | 0.630007  |
| H | 3.037453  | 3.931025  | 0.146008  |
| H | 1.939544  | 3.320154  | 1.411805  |
| C | -0.290413 | 4.492294  | 0.183038  |
| H | -1.304911 | 4.828774  | -0.048826 |
| H | -0.263498 | 4.145674  | 1.218998  |
| H | 0.378100  | 5.359662  | 0.094345  |
| H | -2.022558 | 2.406750  | 0.338375  |

**TS55**

B3LYP SCF energy: -2136.27474827 a.u.  
 B3LYP enthalpy: -2135.672171 a.u.  
 B3LYP free energy: -2135.776932 a.u.  
 M06 SCF energy in solution: -2136.74259784 a.u.  
 M06 enthalpy in solution: -2136.140021 a.u.  
 M06 free energy in solution: -2136.244782 a.u.  
 Imaginary frequency: -201.6078 cm-1

Cartesian coordinates

| ATOM | X         | Y         | Z         |
|------|-----------|-----------|-----------|
| N    | 1.190152  | -1.700208 | 0.288075  |
| C    | 0.883281  | -3.110443 | 0.610847  |
| H    | 1.424343  | -3.781557 | -0.061908 |
| C    | -0.639320 | -3.171916 | 0.423059  |
| N    | -1.001954 | -1.748365 | 0.242847  |
| H    | -1.159446 | -3.589801 | 1.289314  |
| C    | 2.560064  | -1.254344 | 0.210254  |
| C    | -2.389357 | -1.387878 | 0.116517  |
| C    | -5.128549 | -0.824821 | -0.104431 |
| C    | -3.141172 | -1.159284 | 1.285224  |
| C    | -2.989682 | -1.382868 | -1.157896 |
| C    | -4.355323 | -1.087962 | -1.239742 |
| C    | -4.504639 | -0.875512 | 1.146227  |
| C    | -2.515010 | -1.215948 | 2.657847  |
| C    | -2.207166 | -1.695364 | -2.410796 |
| H    | -4.827288 | -1.077787 | -2.219907 |
| H    | -5.092868 | -0.694112 | 2.043205  |
| C    | -6.596440 | -0.486379 | -0.227006 |
| C    | 5.245150  | -0.455627 | 0.046090  |
| C    | 3.243858  | -1.376796 | -1.017980 |
| C    | 3.224480  | -0.827505 | 1.378282  |
| C    | 4.558803  | -0.419458 | 1.262346  |
| C    | 4.576317  | -0.958223 | -1.074429 |
| C    | 2.591128  | -1.975798 | -2.239964 |
| C    | 2.562787  | -0.841318 | 2.735229  |
| H    | 5.076486  | -0.077940 | 2.156034  |
| H    | 5.106642  | -1.036978 | -2.020945 |
| C    | 6.672855  | 0.027750  | -0.056796 |
| H    | -2.078852 | -2.201252 | 2.867592  |
| H    | -1.716229 | -0.473580 | 2.761620  |
| H    | -1.713063 | -2.673148 | -2.347685 |
| H    | -1.426277 | -0.950354 | -2.600828 |
| H    | -6.745239 | 0.594247  | -0.354260 |
| H    | -7.153212 | -0.787202 | 0.666768  |
| H    | -7.050426 | -0.979545 | -1.093184 |
| H    | 2.214961  | -1.847523 | 3.002610  |
| H    | 1.699441  | -0.170263 | 2.777969  |
| H    | 3.302674  | -2.013003 | -3.070250 |
| H    | 1.728183  | -1.385483 | -2.560254 |



|    |           |           |           |
|----|-----------|-----------|-----------|
| H  | 7.245020  | -0.561565 | -0.781732 |
| H  | 7.186308  | -0.027403 | 0.908866  |
| H  | 6.711233  | 1.073972  | -0.388178 |
| C  | 0.078968  | -0.949896 | 0.127817  |
| Ru | 0.108686  | 1.108139  | -0.194142 |
| Cl | -0.065890 | 1.500159  | 2.233963  |
| Cl | 0.469225  | 0.822540  | -2.618864 |
| C  | -1.467873 | 2.028804  | -0.641328 |
| H  | 3.274160  | -0.528136 | 3.505458  |
| H  | 2.251512  | -3.003159 | -2.053646 |
| H  | -2.872990 | -1.720351 | -3.278876 |
| H  | -3.267075 | -1.021494 | 3.428545  |
| H  | -0.933837 | -3.747138 | -0.462233 |
| H  | 1.189970  | -3.334942 | 1.638495  |
| C  | 0.132202  | 3.454668  | -0.627830 |
| C  | 1.376483  | 2.795639  | -0.350736 |
| H  | -1.686747 | 2.067565  | -1.713946 |
| H  | -0.054031 | 3.629739  | -1.685811 |
| H  | 2.046748  | 2.585041  | -1.179827 |
| C  | -2.612962 | 2.432430  | 0.235106  |
| H  | -3.101878 | 3.338137  | -0.150837 |
| H  | -3.355759 | 1.624153  | 0.176664  |
| H  | -2.337682 | 2.563672  | 1.281141  |
| C  | -0.367402 | 4.510362  | 0.336484  |
| H  | -1.386311 | 4.837165  | 0.114093  |
| H  | -0.323285 | 4.149459  | 1.367360  |
| H  | 0.285642  | 5.388831  | 0.252355  |
| H  | 1.833997  | 2.973885  | 0.620983  |

|   |           |           |           |
|---|-----------|-----------|-----------|
| H | -1.441268 | -2.932519 | 1.574226  |
| H | 5.215934  | -1.684599 | 1.570512  |
| H | 4.181623  | 0.491469  | -1.976476 |
| H | 1.806355  | -2.222346 | 2.658922  |
| H | 3.525646  | -2.411201 | 3.037671  |
| H | 2.704002  | -3.630056 | 2.067108  |
| H | 6.830031  | -0.810761 | -1.144904 |
| H | 6.878358  | -0.249837 | 0.530244  |
| H | 6.412549  | 0.862458  | -0.768850 |
| H | 0.970739  | -0.888257 | -2.459134 |
| H | 1.939370  | 0.582982  | -2.765594 |
| H | -5.583235 | -0.775862 | -1.625610 |
| H | -4.616726 | 1.036440  | 2.138007  |
| H | -2.234519 | -1.639301 | -2.526704 |
| H | -3.952403 | -1.859868 | -2.912278 |
| H | -3.117995 | -3.024834 | -1.883599 |
| H | -7.352526 | 0.027194  | 0.824872  |
| H | -7.070782 | 0.987486  | -0.629590 |
| H | -6.699100 | 1.662279  | 0.966507  |
| H | -1.345947 | 0.973983  | 2.082793  |
| H | -1.486176 | -0.688088 | 2.644468  |
| H | -2.609009 | 0.539235  | 3.249040  |
| H | -1.006371 | 2.359838  | -2.193945 |
| H | -1.998863 | 0.866797  | -1.721849 |
| H | 0.615458  | 4.748206  | 2.023307  |
| H | 2.270215  | 4.143832  | 2.109855  |
| H | 1.798785  | 5.227212  | 0.767379  |

#### 56

B3LYP SCF energy: -1286.47272499 a.u.  
 B3LYP enthalpy: -1285.949811 a.u.  
 B3LYP free energy: -1286.045471 a.u.  
 M06 SCF energy in solution: -1286.94855166 a.u.  
 M06 enthalpy in solution: -1286.425638 a.u.  
 M06 free energy in solution: -1286.521298 a.u.

#### Cartesian coordinates

| ATOM | X         | Y         | Z         |
|------|-----------|-----------|-----------|
| Ru   | 0.376970  | 1.011158  | -0.587893 |
| O    | 0.604373  | 2.177692  | 1.228031  |
| O    | 1.191128  | 3.189027  | -0.650484 |
| N    | 0.812205  | -1.708100 | 0.232829  |
| N    | -1.367956 | -1.465660 | 0.045576  |
| C    | -0.183683 | -0.801666 | -0.050027 |
| C    | 0.305157  | -3.089594 | 0.253315  |
| C    | -1.186613 | -2.856486 | 0.507762  |
| C    | 2.193015  | -1.364752 | 0.066110  |
| C    | 3.145506  | -1.767015 | 1.019762  |
| C    | 4.477177  | -1.376230 | 0.833395  |
| C    | 4.877523  | -0.570385 | -0.236493 |
| C    | 3.902005  | -0.150827 | -1.144283 |
| C    | 2.561963  | -0.549791 | -1.036239 |
| C    | 2.771368  | -2.550019 | 2.257148  |
| C    | 6.324125  | -0.169154 | -0.410836 |
| C    | 1.521663  | -0.066341 | -1.991317 |
| C    | -2.673148 | -0.872889 | 0.121024  |
| C    | -3.591000 | -1.133665 | -0.915078 |
| C    | -4.874627 | -0.589114 | -0.821177 |
| C    | -5.265505 | 0.195311  | 0.269174  |
| C    | -4.331315 | 0.428816  | 1.281699  |
| C    | -3.033985 | -0.095515 | 1.237638  |
| C    | -3.201673 | -1.955976 | -2.122104 |
| C    | -6.668087 | 0.750445  | 0.361134  |
| C    | -2.067422 | 0.196780  | 2.361438  |
| C    | -1.058325 | 1.416684  | -1.629377 |
| C    | 1.069184  | 3.206810  | 0.601783  |
| C    | 1.465648  | 4.416456  | 1.417906  |
| H    | 0.772480  | -3.693474 | 1.032347  |
| H    | 0.487258  | -3.573003 | -0.717049 |
| H    | -1.828033 | -3.545095 | -0.047736 |

#### Ts57

B3LYP SCF energy: -1443.67459973 a.u.  
 B3LYP enthalpy: -1443.035410 a.u.  
 B3LYP free energy: -1443.143404 a.u.  
 M06 SCF energy in solution: -1444.08729563 a.u.  
 M06 enthalpy in solution: -1443.448106 a.u.  
 M06 free energy in solution: -1443.556100 a.u.  
 Imaginary frequency: -126.6487 cm<sup>-1</sup>

#### Cartesian coordinates

| ATOM | X         | Y         | Z         |
|------|-----------|-----------|-----------|
| Ru   | 0.421739  | 0.729941  | 0.015832  |
| O    | 1.030305  | 3.403305  | -1.968168 |
| O    | 1.651058  | 2.513307  | 0.020579  |
| N    | 0.473114  | -2.140061 | -0.241117 |
| N    | -1.654116 | -1.632090 | -0.375992 |
| C    | -0.426565 | -1.103040 | -0.136966 |
| C    | -0.126049 | -3.345331 | -0.841864 |
| C    | -1.619461 | -3.090763 | -0.607941 |
| C    | 1.875837  | -1.855845 | -0.323304 |
| C    | 2.800245  | -2.634662 | 0.396550  |
| C    | 4.154202  | -2.291741 | 0.320796  |
| C    | 4.605096  | -1.190429 | -0.419260 |
| C    | 3.662981  | -0.423449 | -1.105233 |
| C    | 2.294541  | -0.746668 | -1.106467 |
| C    | 2.364774  | -3.790498 | 1.267286  |
| C    | 6.077022  | -0.853153 | -0.484116 |
| C    | 1.287695  | 0.102240  | -1.798280 |
| C    | -2.920591 | -0.966577 | -0.273145 |
| C    | -3.484897 | -0.395372 | -1.430240 |
| C    | -4.737370 | 0.215172  | -1.324394 |
| C    | -5.436184 | 0.269451  | -0.112569 |
| C    | -4.847965 | -0.309700 | 1.015078  |
| C    | -3.598179 | -0.938467 | 0.958391  |
| C    | -2.742611 | -0.398994 | -2.745093 |
| C    | -6.796915 | 0.922164  | -0.035524 |
| C    | -3.008211 | -1.563127 | 2.202266  |
| C    | -1.094233 | 1.787395  | -0.088440 |
| C    | 1.716381  | 3.387339  | -0.943225 |
| H    | 0.224946  | -4.261059 | -0.361077 |
| H    | 0.122889  | -3.396975 | -1.910782 |
| H    | -2.242861 | -3.362340 | -1.464664 |
| H    | -1.996416 | -3.626499 | 0.273216  |

|   |           |           |           |
|---|-----------|-----------|-----------|
| H | 4.874241  | -2.886513 | 0.879639  |
| H | 3.984026  | 0.445312  | -1.674327 |
| H | 1.422367  | -3.570655 | 1.780864  |
| H | 3.123279  | -4.009176 | 2.025282  |
| H | 2.215225  | -4.712439 | 0.688547  |
| H | 6.234112  | 0.223346  | -0.608166 |
| H | 6.562200  | -1.353148 | -1.333318 |
| H | 6.602160  | -1.171264 | 0.423101  |
| H | 0.608011  | -0.468192 | -2.439428 |
| H | 1.715603  | 0.945325  | -2.338141 |
| H | -5.174543 | 0.668131  | -2.211819 |
| H | -5.373669 | -0.274535 | 1.967020  |
| H | -1.825477 | 0.197093  | -2.677129 |
| H | -3.363879 | 0.021265  | -3.541380 |
| H | -2.447808 | -1.410995 | -3.047927 |
| H | -7.569984 | 0.281425  | -0.479862 |
| H | -6.815546 | 1.873161  | -0.579675 |
| H | -7.088881 | 1.119472  | 1.000819  |
| H | -1.962289 | -1.274195 | 2.346898  |
| H | -3.035586 | -2.659922 | 2.158761  |
| H | -3.570886 | -1.261065 | 3.090723  |
| H | -2.133251 | 1.463742  | 0.019168  |
| C | 0.682994  | 0.604483  | 2.286841  |
| C | -0.337712 | 1.560784  | 2.262031  |
| H | 0.377791  | -0.419369 | 2.497365  |
| H | -1.353141 | 1.194580  | 2.390159  |
| C | 2.763546  | 4.481385  | -0.695625 |
| H | 3.740356  | 4.035146  | -0.477003 |
| H | 2.842808  | 5.137154  | -1.565678 |
| H | 2.481432  | 5.079024  | 0.180088  |
| C | -0.112729 | 3.026984  | 2.537046  |
| H | 0.712875  | 3.410072  | 1.932884  |
| H | -1.009229 | 3.615859  | 2.322950  |
| H | 0.136895  | 3.168188  | 3.599168  |
| C | 2.123402  | 0.928824  | 2.629703  |
| H | 2.785254  | 0.109566  | 2.330388  |
| H | 2.459988  | 1.837565  | 2.127680  |
| H | 2.231644  | 1.059268  | 3.717476  |
| H | -0.949321 | 2.857954  | -0.263755 |

#### TS60

B3LYP SCF energy: -1443.68952604 a.u.  
 B3LYP enthalpy: -1443.049442 a.u.  
 B3LYP free energy: -1443.155367 a.u.  
 M06 SCF energy in solution: -1444.09586616 a.u.  
 M06 enthalpy in solution: -1443.455782 a.u.  
 M06 free energy in solution: -1443.561707 a.u.  
 Imaginary frequency: -231.1418 cm<sup>-1</sup>

#### Cartesian coordinates

| ATOM | X         | Y         | Z         |
|------|-----------|-----------|-----------|
| O    | -0.759744 | 2.648139  | -0.879667 |
| O    | 0.535443  | 3.190709  | 0.832189  |
| C    | 1.146077  | 0.396829  | 2.147738  |
| C    | -0.173006 | 3.519454  | -0.178825 |
| H    | 1.114824  | -0.637121 | 2.516458  |
| C    | -1.629108 | 1.244086  | 1.580581  |
| C    | -0.835662 | 0.977332  | 2.740458  |
| H    | -1.932577 | 2.274648  | 1.412645  |
| H    | -2.341133 | 0.500880  | 1.247346  |
| H    | -0.963651 | -0.012260 | 3.176703  |
| C    | -0.275161 | 4.989183  | -0.546097 |
| H    | 0.627624  | 5.288971  | -1.092198 |
| H    | -0.334604 | 5.605252  | 0.355932  |
| H    | -1.142563 | 5.168378  | -1.185721 |
| Ru   | 0.262632  | 0.980941  | 0.566760  |
| C    | 0.049377  | -0.917414 | -0.108416 |
| C    | 1.560280  | 1.031272  | -1.118463 |
| N    | 1.153930  | -1.684464 | -0.412535 |
| N    | -1.033323 | -1.610495 | -0.562151 |
| C    | 2.715505  | 0.162447  | -0.758818 |

|   |           |           |           |
|---|-----------|-----------|-----------|
| H | 1.004962  | 0.658054  | -1.987616 |
| H | 1.872856  | 2.059844  | -1.314613 |
| C | 0.825709  | -2.776406 | -1.350481 |
| C | 2.495576  | -1.182126 | -0.375371 |
| C | -0.682783 | -2.912419 | -1.160324 |
| C | -2.424096 | -1.283382 | -0.428081 |
| C | 4.024234  | 0.654175  | -0.703354 |
| H | 1.365357  | -3.694717 | -1.115210 |
| H | 1.089371  | -2.473109 | -2.373165 |
| C | 3.545913  | -1.995914 | 0.071353  |
| H | -1.226242 | -3.064167 | -2.097281 |
| H | -0.942009 | -3.731202 | -0.476359 |
| C | -3.038583 | -0.470974 | -1.400353 |
| C | -3.168954 | -1.853111 | 0.622759  |
| C | 5.103705  | -0.144862 | -0.302375 |
| H | 4.199925  | 1.689797  | -0.987240 |
| C | 4.844175  | -1.460097 | 0.083262  |
| C | 3.324916  | -3.401628 | 0.583020  |
| C | -4.410516 | -0.224184 | -1.280902 |
| C | -2.256453 | 0.149005  | -2.532506 |
| C | -4.537454 | -1.573762 | 0.698102  |
| C | -2.525208 | -2.738296 | 1.666156  |
| C | 6.509667  | 0.410261  | -0.291499 |
| H | 5.663925  | -2.087896 | 0.426922  |
| H | 2.362952  | -3.494443 | 1.098763  |
| H | 4.114685  | -3.678873 | 1.288619  |
| H | 3.341953  | -4.149704 | -0.221909 |
| C | -5.176624 | -0.758237 | -0.240447 |
| H | -4.892036 | 0.405373  | -2.026282 |
| H | -1.713535 | 1.036310  | -2.186645 |
| H | -2.930252 | 0.455925  | -3.338934 |
| H | -1.520221 | -0.546125 | -2.950776 |
| H | -5.115843 | -2.002453 | 1.514179  |
| H | -1.519407 | -2.394142 | 1.926629  |
| H | -2.433970 | -3.776630 | 1.319676  |
| H | -3.127200 | -2.758050 | 2.579944  |
| H | 6.893880  | 0.543087  | -1.311635 |
| H | 7.200100  | -0.256210 | 0.235947  |
| H | 6.549413  | 1.391943  | 0.195257  |
| C | -6.649609 | -0.441903 | -0.121606 |
| H | -7.183061 | -1.216138 | 0.439815  |
| H | -7.120382 | -0.350735 | -1.106573 |
| H | -6.808351 | 0.510113  | 0.402135  |
| C | -0.590666 | 2.102763  | 3.727197  |
| H | 0.160480  | 1.852124  | 4.480940  |
| H | -0.276559 | 3.008308  | 3.200940  |
| H | -1.528044 | 2.320499  | 4.257015  |
| C | 2.196238  | 1.227957  | 2.830578  |
| H | 2.209180  | 1.099933  | 3.922231  |
| H | 3.167934  | 0.869792  | 2.456168  |
| H | 2.114765  | 2.289229  | 2.583577  |

#### E-butene

B3LYP SCF energy: -157.22387052 a.u.  
 B3LYP enthalpy: -157.108916 a.u.  
 B3LYP free energy: -157.142690 a.u.  
 M06 SCF energy in solution: -157.13351694 a.u.  
 M06 enthalpy in solution: -157.018562 a.u.  
 M06 free energy in solution: -157.052336 a.u.

#### Cartesian coordinates

| ATOM | X         | Y         | Z         |
|------|-----------|-----------|-----------|
| C    | -0.538154 | -0.395563 | 0.000045  |
| H    | -0.392445 | -1.477890 | -0.000051 |
| C    | 0.538151  | 0.395548  | 0.000018  |
| H    | 0.392391  | 1.477873  | -0.000028 |
| C    | -1.963802 | 0.079262  | -0.000030 |
| H    | -2.508227 | -0.289062 | -0.880482 |
| H    | -2.508226 | -0.289044 | 0.880481  |
| H    | -2.022894 | 1.173244  | 0.000016  |
| C    | 1.963808  | -0.079246 | -0.000013 |

|   |          |           |           |
|---|----------|-----------|-----------|
| H | 2.022921 | -1.173239 | -0.000229 |
| H | 2.508268 | 0.289234  | -0.880395 |
| H | 2.508194 | 0.288879  | 0.880568  |

|                              |                     |
|------------------------------|---------------------|
| B3LYP SCF energy:            | -1536.03380584 a.u. |
| B3LYP enthalpy:              | -1535.369804 a.u.   |
| B3LYP free energy:           | -1535.467919 a.u.   |
| M06 SCF energy in solution:  | -1536.45382313 a.u. |
| M06 enthalpy in solution:    | -1535.789821 a.u.   |
| M06 free energy in solution: | -1535.887936 a.u.   |

**ethylene**

|                              |                   |
|------------------------------|-------------------|
| B3LYP SCF energy:            | -78.58582485 a.u. |
| B3LYP enthalpy:              | -78.530604 a.u.   |
| B3LYP free energy:           | -78.555465 a.u.   |
| M06 SCF energy in solution:  | -78.53967110 a.u. |
| M06 enthalpy in solution:    | -78.484450 a.u.   |
| M06 free energy in solution: | -78.509311 a.u.   |

Cartesian coordinates

| ATOM | X        | Y         | Z         |
|------|----------|-----------|-----------|
| C    | 0.000000 | 0.000000  | 0.665610  |
| H    | 0.000000 | 0.923760  | 1.239622  |
| H    | 0.000000 | -0.923760 | 1.239622  |
| C    | 0.000000 | 0.000000  | -0.665610 |
| H    | 0.000000 | -0.923760 | -1.239622 |
| H    | 0.000000 | 0.923760  | -1.239622 |

**propene**

|                              |                    |
|------------------------------|--------------------|
| B3LYP SCF energy:            | -117.90521904 a.u. |
| B3LYP enthalpy:              | -117.820087 a.u.   |
| B3LYP free energy:           | -117.850105 a.u.   |
| M06 SCF energy in solution:  | -117.83720744 a.u. |
| M06 enthalpy in solution:    | -117.752075 a.u.   |
| M06 free energy in solution: | -117.782093 a.u.   |

Cartesian coordinates

| ATOM | X         | Y         | Z         |
|------|-----------|-----------|-----------|
| C    | 1.139458  | -0.504279 | 0.000000  |
| H    | 0.779347  | -1.538748 | 0.000000  |
| H    | 1.781316  | -0.366166 | 0.880645  |
| H    | 1.781316  | -0.366166 | -0.880645 |
| C    | 0.000000  | 0.475026  | 0.000000  |
| H    | 0.277926  | 1.530165  | 0.000000  |
| C    | -1.293406 | 0.149794  | 0.000000  |
| H    | -1.621773 | -0.887951 | 0.000000  |
| H    | -2.074446 | 0.905621  | 0.000000  |

**Z-butene**

|                              |                    |
|------------------------------|--------------------|
| B3LYP SCF energy:            | -157.22172615 a.u. |
| B3LYP enthalpy:              | -157.106612 a.u.   |
| B3LYP free energy:           | -157.140805 a.u.   |
| M06 SCF energy in solution:  | -157.13186478 a.u. |
| M06 enthalpy in solution:    | -157.016751 a.u.   |
| M06 free energy in solution: | -157.050944 a.u.   |

Cartesian coordinates

| ATOM | X         | Y         | Z         |
|------|-----------|-----------|-----------|
| C    | -0.669341 | 0.664333  | 0.000017  |
| H    | -1.169678 | 1.633564  | -0.000021 |
| C    | 0.669331  | 0.664372  | 0.000011  |
| H    | 1.169571  | 1.633649  | -0.000063 |
| C    | -1.593233 | -0.521956 | -0.000003 |
| H    | -2.250579 | -0.505579 | -0.880214 |
| H    | -1.060367 | -1.476899 | 0.000055  |
| H    | -2.250674 | -0.505532 | 0.880113  |
| C    | 1.593246  | -0.521949 | 0.000000  |
| H    | 1.060349  | -1.476859 | 0.000189  |
| H    | 2.250550  | -0.505677 | -0.880247 |
| H    | 2.250810  | -0.505469 | 0.880041  |

Cartesian coordinates

| ATOM | X         | Y         | Z         |
|------|-----------|-----------|-----------|
| Ru   | -0.433569 | 0.803673  | 0.203201  |
| O    | -1.497047 | 2.507263  | -1.643022 |
| O    | -1.465675 | 2.692377  | 0.535121  |
| N    | -0.646777 | -2.053470 | -0.180673 |
| N    | 1.506822  | -1.764092 | 0.066336  |
| C    | 0.308479  | -1.103782 | -0.019586 |
| C    | -0.163013 | -3.422013 | 0.008730  |
| H    | -0.568969 | -4.102708 | -0.744695 |
| H    | -0.445125 | -3.800904 | 1.000899  |
| C    | 1.351539  | -3.225791 | -0.120687 |
| H    | 1.923546  | -3.776159 | 0.631339  |
| H    | 1.722979  | -3.518301 | -1.111366 |
| C    | -2.050880 | -1.648581 | -0.108192 |
| C    | -2.574496 | -1.713603 | 1.351999  |
| H    | -1.915671 | -1.121824 | 1.999966  |
| H    | -2.542608 | -2.752136 | 1.712201  |
| C    | -4.016354 | -1.174427 | 1.418790  |
| H    | -4.373490 | -1.227230 | 2.455743  |
| H    | -4.920351 | -2.036282 | 0.513572  |
| C    | -4.933716 | -3.076276 | 0.870299  |
| H    | -5.954985 | -1.670763 | 0.556240  |
| C    | -4.402625 | -1.976871 | -0.938705 |
| H    | -5.043817 | -2.590335 | -1.585335 |
| C    | -2.960625 | -2.530014 | -0.995837 |
| H    | -2.584819 | -2.522969 | -2.027621 |
| H    | -2.950080 | -3.573736 | -0.647823 |
| C    | -4.419458 | -0.512705 | -1.422354 |
| H    | -4.082135 | -0.449146 | -2.465400 |
| H    | -5.446820 | -0.123432 | -1.394494 |
| C    | -3.505821 | 0.357954  | -0.517161 |
| H    | -3.536751 | 1.385593  | -0.882417 |
| C    | -2.077931 | -0.200333 | -0.632990 |
| H    | -1.767710 | -0.197599 | -1.688789 |
| C    | -4.026177 | 0.289245  | 0.933084  |
| H    | -3.404476 | 0.916858  | 1.583082  |
| H    | -5.046680 | 0.692904  | 0.980711  |
| C    | 2.830355  | -1.233943 | -0.106652 |
| C    | 3.708105  | -1.204960 | 0.992712  |
| C    | 5.015673  | -0.745515 | 0.791287  |
| H    | 5.693922  | -0.710991 | 1.641364  |
| C    | 5.473371  | -0.339619 | -0.464414 |
| C    | 4.587683  | -0.417479 | -1.545347 |
| H    | 4.930025  | -0.123816 | -2.535445 |
| C    | 3.271883  | -0.864060 | -1.395511 |
| C    | 3.285620  | -1.687245 | 2.361305  |
| H    | 3.952337  | -1.293821 | 3.134654  |
| H    | 3.325421  | -2.783277 | 2.427731  |
| H    | 2.262337  | -1.388988 | 2.602831  |
| C    | 6.878796  | 0.182473  | -0.651612 |
| H    | 6.902837  | 1.279097  | -0.601244 |
| H    | 7.286251  | -0.104933 | -1.626946 |
| H    | 7.553800  | -0.194500 | 0.123620  |
| C    | 2.354332  | -0.925786 | -2.595827 |
| H    | 1.902661  | -1.916841 | -2.719784 |
| H    | 2.905523  | -0.695333 | -3.512107 |
| H    | 1.528714  | -0.210199 | -2.510442 |
| C    | 0.262675  | 0.942326  | 2.056745  |
| C    | 1.309731  | 1.782392  | -0.239509 |
| C    | 1.408132  | 1.800359  | 1.342879  |
| H    | 0.658615  | 0.082452  | 2.599841  |
| H    | -0.375417 | 1.566099  | 2.691062  |
| H    | 2.330967  | 1.251645  | 1.554219  |
| H    | 2.059090  | 1.112102  | -0.650044 |
| C    | 1.456426  | 3.208879  | 1.948928  |

**23-mono**

|   |           |          |           |
|---|-----------|----------|-----------|
| H | 1.635603  | 3.140578 | 3.027809  |
| H | 2.261415  | 3.808173 | 1.509443  |
| H | 0.508068  | 3.730794 | 1.793796  |
| C | 1.331789  | 3.101580 | -0.984250 |
| H | 2.353711  | 3.512152 | -0.965882 |
| H | 1.058503  | 2.948837 | -2.032061 |
| H | 0.663615  | 3.856140 | -0.568055 |
| N | -1.811077 | 3.177678 | -0.626137 |
| O | -2.413973 | 4.243757 | -0.676197 |

**24-mono**

B3LYP SCF energy: -1536.03471628 a.u.  
 B3LYP enthalpy: -1535.370905 a.u.  
 B3LYP free energy: -1535.468727 a.u.  
 M06 SCF energy in solution: -1536.45385846 a.u.  
 M06 enthalpy in solution: -1535.790047 a.u.  
 M06 free energy in solution: -1535.887869 a.u.

Cartesian coordinates

| ATOM | X         | Y         | Z         |
|------|-----------|-----------|-----------|
| Ru   | -0.332880 | 0.865344  | -0.173476 |
| O    | -1.772311 | 2.154169  | 1.761104  |
| O    | -1.245855 | 2.867225  | -0.237983 |
| N    | -0.695674 | -2.016420 | -0.204171 |
| N    | 1.467367  | -1.778888 | -0.013413 |
| C    | 0.292275  | -1.086998 | -0.105072 |
| C    | -0.239922 | -3.394924 | -0.004610 |
| H    | -0.659347 | -4.069237 | -0.756601 |
| H    | -0.534866 | -3.763594 | 0.987014  |
| C    | 1.280924  | -3.239898 | -0.133013 |
| H    | 1.835432  | -3.765172 | 0.650150  |
| H    | 1.651734  | -3.589862 | -1.105200 |
| C    | -2.095007 | -1.602464 | -0.115375 |
| C    | -2.646338 | -1.792583 | 1.323122  |
| H    | -2.008878 | -1.243787 | 2.027453  |
| H    | -2.607154 | -2.856484 | 1.597188  |
| C    | -4.098526 | -1.279358 | 1.405904  |
| H    | -4.474930 | -1.438682 | 2.424788  |
| C    | -4.978540 | -2.048633 | 0.400616  |
| H    | -4.992225 | -3.121285 | 0.642146  |
| H    | -6.015853 | -1.693753 | 0.463658  |
| C    | -4.432997 | -1.832939 | -1.026084 |
| H    | -5.060505 | -2.370988 | -1.748851 |
| C    | -2.993395 | -2.387119 | -1.104061 |
| H    | -2.589852 | -2.285463 | -2.120444 |
| H    | -2.996813 | -3.459392 | -0.858680 |
| C    | -4.436306 | -0.324841 | -1.357258 |
| H    | -4.077840 | -0.160817 | -2.382971 |
| H    | -5.462443 | 0.065029  | -1.311803 |
| C    | -3.541026 | 0.443465  | -0.343251 |
| H    | -3.545353 | 1.508989  | -0.593043 |
| C    | -2.120924 | -0.118036 | -0.492790 |
| H    | -1.821129 | -0.019864 | -1.565840 |
| C    | -4.113565 | 0.223512  | 1.073043  |
| H    | -3.530391 | 0.789249  | 1.803167  |
| H    | -5.143700 | 0.603813  | 1.110042  |
| C    | 2.802177  | -1.274525 | 0.123028  |
| C    | 3.315229  | -1.063007 | 1.421302  |
| C    | 4.625329  | -0.598488 | 1.552902  |
| H    | 5.020276  | -0.419420 | 2.550761  |
| C    | 5.445707  | -0.368954 | 0.440653  |
| C    | 4.929407  | -0.648575 | -0.825624 |
| H    | 5.560713  | -0.506430 | -1.700642 |
| C    | 3.620544  | -1.115090 | -1.009789 |
| C    | 2.494224  | -1.378463 | 2.651741  |
| H    | 2.986539  | -0.999980 | 3.552402  |
| H    | 2.373903  | -2.463221 | 2.776456  |
| H    | 1.489746  | -0.948781 | 2.605462  |
| C    | 6.847189  | 0.168933  | 0.612193  |
| H    | 6.836227  | 1.254291  | 0.777246  |
| H    | 7.461195  | -0.021784 | -0.273795 |

|   |           |           |           |
|---|-----------|-----------|-----------|
| H | 7.346876  | -0.283155 | 1.476208  |
| C | 3.159174  | -1.479492 | -2.403788 |
| H | 3.559494  | -2.459068 | -2.698593 |
| H | 3.520866  | -0.753551 | -3.139775 |
| H | 2.071131  | -1.528095 | -2.483056 |
| C | 0.985475  | 1.393025  | -1.590352 |
| C | 1.741296  | 2.045438  | -0.323586 |
| C | 1.072955  | 1.645705  | 1.041835  |
| H | 1.602351  | 0.596459  | -2.004773 |
| H | 2.716841  | 1.551261  | -0.324997 |
| H | 1.688834  | 0.989741  | 1.650703  |
| H | 0.703104  | 2.499320  | 1.610234  |
| C | 0.490406  | 2.315667  | -2.693136 |
| H | 1.328806  | 2.822488  | -3.194315 |
| H | -0.026601 | 1.724298  | -3.459457 |
| H | -0.200904 | 3.078468  | -2.328137 |
| O | -2.427249 | 4.133228  | 1.094943  |
| N | -1.840328 | 3.074304  | 0.905863  |
| C | 1.901552  | 3.568194  | -0.426720 |
| H | 2.506708  | 3.933932  | 0.410508  |
| H | 2.405375  | 3.856157  | -1.356174 |
| H | 0.929215  | 4.065967  | -0.388948 |

**30-mono**

B3LYP SCF energy: -1496.72425741 a.u.  
 B3LYP enthalpy: -1496.090256 a.u.  
 B3LYP free energy: -1496.185918 a.u.  
 M06 SCF energy in solution: -1497.16342619 a.u.  
 M06 enthalpy in solution: -1496.529425 a.u.  
 M06 free energy in solution: -1496.625087 a.u.

Cartesian coordinates

| ATOM | X         | Y         | Z         |
|------|-----------|-----------|-----------|
| Ru   | -0.308622 | 0.947510  | -0.204367 |
| O    | -1.784914 | 2.234515  | 1.690059  |
| O    | -1.258102 | 2.926264  | -0.316010 |
| N    | -0.582577 | -1.943942 | -0.150158 |
| N    | 1.572447  | -1.629960 | 0.027371  |
| C    | 0.374828  | -0.981331 | -0.083633 |
| C    | -0.081503 | -3.299102 | 0.095489  |
| H    | -0.481514 | -4.013086 | -0.629967 |
| H    | -0.360362 | -3.641407 | 1.101127  |
| C    | 1.433344  | -3.099351 | -0.045582 |
| H    | 2.007551  | -3.582011 | 0.750629  |
| H    | 1.811191  | -3.467430 | -1.008376 |
| C    | -1.994713 | -1.569994 | -0.078993 |
| C    | -2.545960 | -1.728840 | 1.362876  |
| H    | -1.928664 | -1.137438 | 2.050528  |
| H    | -2.475859 | -2.781364 | 1.672519  |
| C    | -4.013673 | -1.257296 | 1.423136  |
| H    | -4.390016 | -1.394416 | 2.445260  |
| C    | -4.865294 | -2.085497 | 0.440367  |
| H    | -4.847523 | -3.149638 | 0.716826  |
| H    | -5.913231 | -1.760733 | 0.487958  |
| C    | -4.319897 | -1.900226 | -0.990548 |
| H    | -4.927800 | -2.480022 | -1.697619 |
| C    | -2.864170 | -2.414083 | -1.044206 |
| H    | -2.458660 | -2.334614 | -2.061789 |
| H    | -2.837070 | -3.477196 | -0.762895 |
| C    | -4.366517 | -0.404374 | -1.371172 |
| H    | -4.007966 | -0.263265 | -2.400241 |
| H    | -5.404378 | -0.045067 | -1.342747 |
| C    | -3.500132 | 0.423775  | -0.379648 |
| H    | -3.535761 | 1.480128  | -0.664278 |
| C    | -2.062952 | -0.099549 | -0.506349 |
| H    | -1.763994 | -0.030511 | -1.581040 |
| C    | -4.072310 | 0.232769  | 1.040829  |
| H    | -3.509955 | 0.839362  | 1.754186  |
| H    | -5.113604 | 0.582834  | 1.061876  |
| C    | 2.888868  | -1.072287 | 0.132388  |
| C    | 3.408317  | -0.802685 | 1.417517  |

|   |           |           |           |   |           |           |           |
|---|-----------|-----------|-----------|---|-----------|-----------|-----------|
| C | 4.698991  | -0.280181 | 1.518951  | H | -5.344383 | -0.045723 | -1.505237 |
| H | 5.097633  | -0.055965 | 2.506177  | C | -3.449040 | 0.412354  | -0.521760 |
| C | 5.495446  | -0.047783 | 0.389808  | H | -3.488127 | 1.460920  | -0.820936 |
| C | 4.976115  | -0.384671 | -0.861120 | C | -2.006129 | -0.109922 | -0.618421 |
| H | 5.590475  | -0.241437 | -1.747944 | H | -1.659724 | -0.033207 | -1.660115 |
| C | 3.686248  | -0.911678 | -1.014881 | C | -4.023744 | 0.237418  | 0.898724  |
| C | 2.615826  | -1.116119 | 2.667131  | H | -3.444369 | 0.833074  | 1.614210  |
| H | 3.094972  | -0.679758 | 3.548510  | H | -5.054714 | 0.615159  | 0.930623  |
| H | 2.554783  | -2.200503 | 2.832071  | C | 2.895632  | -1.066956 | -0.099250 |
| H | 1.589545  | -0.742142 | 2.615899  | C | 3.789484  | -1.083703 | 0.986761  |
| C | 6.875317  | 0.551929  | 0.528454  | C | 5.078687  | -0.569423 | 0.798374  |
| H | 6.820054  | 1.634016  | 0.705230  | H | 5.769575  | -0.570568 | 1.638866  |
| H | 7.472612  | 0.396666  | -0.375586 | C | 5.502570  | -0.064353 | -0.432914 |
| H | 7.418698  | 0.115246  | 1.373989  | C | 4.601248  | -0.095593 | -1.503406 |
| C | 3.225929  | -1.338690 | -2.391450 | H | 4.917264  | 0.276717  | -2.475716 |
| H | 3.666663  | -2.308178 | -2.660757 | C | 3.303113  | -0.593882 | -1.365620 |
| H | 3.546925  | -0.620715 | -3.153649 | C | 3.402907  | -1.667137 | 2.326274  |
| H | 2.140327  | -1.438404 | -2.455993 | H | 4.088020  | -1.328431 | 3.109354  |
| C | 0.995004  | 1.475983  | -1.631171 | H | 3.445995  | -2.764855 | 2.311857  |
| C | 1.679855  | 2.197591  | -0.378620 | H | 2.385174  | -1.391392 | 2.615093  |
| C | 1.071101  | 1.802455  | 1.002324  | C | 6.888191  | 0.512495  | -0.606653 |
| H | 1.646543  | 0.695174  | -2.020436 | H | 6.870537  | 1.608617  | -0.545492 |
| H | 1.574772  | 3.275229  | -0.520901 | H | 7.310926  | 0.251071  | -1.583032 |
| H | 2.730771  | 1.896299  | -0.388126 | H | 7.573080  | 0.152329  | 0.167685  |
| H | 1.718567  | 1.175989  | 1.608493  | C | 2.366550  | -0.599063 | -2.552560 |
| H | 0.668015  | 2.642986  | 1.564782  | H | 1.931650  | -1.589254 | -2.731272 |
| C | 0.523983  | 2.409399  | -2.733750 | H | 2.897018  | -0.300024 | -3.461235 |
| H | 1.379177  | 2.940553  | -3.180505 | H | 1.528911  | 0.092869  | -2.407896 |
| H | 0.040437  | 1.841636  | -3.538523 | C | 0.242464  | 0.842746  | 2.223526  |
| H | -0.184026 | 3.155192  | -2.362701 | C | 1.311833  | 1.915811  | 0.026418  |
| O | -2.489490 | 4.181484  | 0.981460  | C | 1.350353  | 1.790064  | 1.593474  |
| N | -1.870183 | 3.137397  | 0.816677  | H | 0.658965  | -0.054743 | 2.682998  |

### 31-mono

B3LYP SCF energy: -1496.72303339 a.u.  
 B3LYP enthalpy: -1496.088920 a.u.  
 B3LYP free energy: -1496.185017 a.u.  
 M06 SCF energy in solution: -1497.16320049 a.u.  
 M06 enthalpy in solution: -1496.529087 a.u.  
 M06 free energy in solution: -1496.625184 a.u.

|   |           |           |           |
|---|-----------|-----------|-----------|
| H | -5.344383 | -0.045723 | -1.505237 |
| C | -3.449040 | 0.412354  | -0.521760 |
| H | -3.488127 | 1.460920  | -0.820936 |
| C | -2.006129 | -0.109922 | -0.618421 |
| H | -1.659724 | -0.033207 | -1.660115 |
| C | -4.023744 | 0.237418  | 0.898724  |
| H | -3.444369 | 0.833074  | 1.614210  |
| H | -5.054714 | 0.615159  | 0.930623  |
| C | 2.895632  | -1.066956 | -0.099250 |
| C | 3.789484  | -1.083703 | 0.986761  |
| C | 5.078687  | -0.569423 | 0.798374  |
| H | 5.769575  | -0.570568 | 1.638866  |
| C | 5.502570  | -0.064353 | -0.432914 |
| C | 4.601248  | -0.095593 | -1.503406 |
| H | 4.917264  | 0.276717  | -2.475716 |
| C | 3.303113  | -0.593882 | -1.365620 |
| C | 3.402907  | -1.667137 | 2.326274  |
| H | 4.088020  | -1.328431 | 3.109354  |
| H | 3.445995  | -2.764855 | 2.311857  |
| H | 2.385174  | -1.391392 | 2.615093  |
| C | 6.888191  | 0.512495  | -0.606653 |
| H | 6.870537  | 1.608617  | -0.545492 |
| H | 7.310926  | 0.251071  | -1.583032 |
| H | 7.573080  | 0.152329  | 0.167685  |
| C | 2.366550  | -0.599063 | -2.552560 |
| H | 1.931650  | -1.589254 | -2.731272 |
| H | 2.897018  | -0.300024 | -3.461235 |
| H | 1.528911  | 0.092869  | -2.407896 |
| C | 0.242464  | 0.842746  | 2.223526  |
| C | 1.311833  | 1.915811  | 0.026418  |
| C | 1.350353  | 1.790064  | 1.593474  |
| H | 0.658965  | -0.054743 | 2.682998  |
| H | -0.422991 | 1.382595  | 2.902961  |
| H | 2.323296  | 1.363720  | 1.851548  |
| H | 2.094520  | 1.320915  | -0.436080 |
| C | 1.310720  | 3.329717  | -0.517934 |
| H | 2.322506  | 3.753615  | -0.418116 |
| H | 1.047793  | 3.345078  | -1.579093 |
| H | 0.620454  | 3.985727  | 0.017577  |
| N | -1.819864 | 3.254880  | -0.313871 |
| O | -2.458366 | 4.300639  | -0.295497 |
| H | 1.232207  | 2.788945  | 2.018660  |

### Cartesian coordinates

| ATOM | X         | Y         | Z         |
|------|-----------|-----------|-----------|
| Ru   | -0.408766 | 0.856085  | 0.343563  |
| O    | -1.457067 | 2.679957  | -1.373330 |
| O    | -1.485940 | 2.687787  | 0.812274  |
| N    | -0.554284 | -1.965370 | -0.239997 |
| N    | 1.590400  | -1.645855 | 0.056078  |
| C    | 0.378091  | -1.009482 | -0.007598 |
| C    | -0.042938 | -3.332869 | -0.133689 |
| H    | -0.421605 | -3.970664 | -0.937240 |
| H    | -0.332471 | -3.783001 | 0.826044  |
| C    | 1.469759  | -3.096388 | -0.224613 |
| H    | 2.041428  | -3.681327 | 0.501103  |
| H    | 1.862985  | -3.317987 | -1.225287 |
| C    | -1.968629 | -1.590546 | -0.188707 |
| C    | -2.544453 | -1.761185 | 1.242728  |
| H    | -1.924152 | -1.201236 | 1.953796  |
| H    | -2.503286 | -2.820582 | 1.534802  |
| C    | -3.999826 | -1.254643 | 1.288067  |
| H    | -4.393757 | -1.382518 | 2.304948  |
| C    | -4.850771 | -2.072078 | 0.294733  |
| H    | -4.855222 | -3.133443 | 0.581822  |
| H    | -5.893871 | -1.729795 | 0.321561  |
| C    | -4.280835 | -1.906228 | -1.129308 |
| H    | -4.884295 | -2.487038 | -1.839293 |
| C    | -2.826802 | -2.428167 | -1.165892 |
| H    | -2.412133 | -2.347701 | -2.179458 |
| H    | -2.807992 | -3.491916 | -0.885287 |
| C    | -4.309019 | -0.413932 | -1.516653 |
| H    | -3.932779 | -0.276659 | -2.539185 |
